# Supplementary material for: Zika virus remodels and hijacks IGF2BP2 ribonucleoprotein complex to promote viral replication organelle biogenesis
Source: eLife journal article supplement (doi:10.7554/elife.94347), 2024-02-19

Figure 4A

## Anti-IGF2BP2

- 1-
  - 2- Mock 48hpi
  - 3- Mock 72hpi
  - 4-
  - 5- ZIKV 48hpi
  - 6- ZIKV 72hpi
  - 7-
  - 8-
  - 9-
- Use for figure
- Use for figure

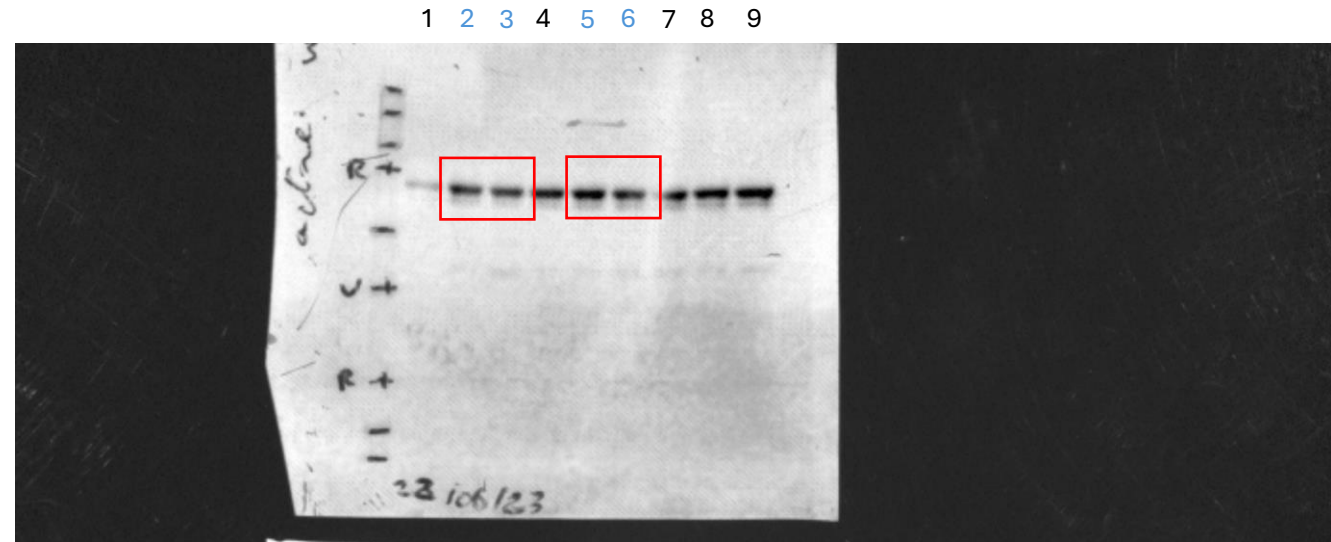

## Anti-IGF2BP1

- 1-
  - 2- Mock 48hpi
  - 3- Mock 72hpi
  - 4-
  - 5- ZIKV 48hpi
  - 6- ZIKV 72hpi
  - 7-
  - 8-
  - 9-
- Use for figure
- Use for figure

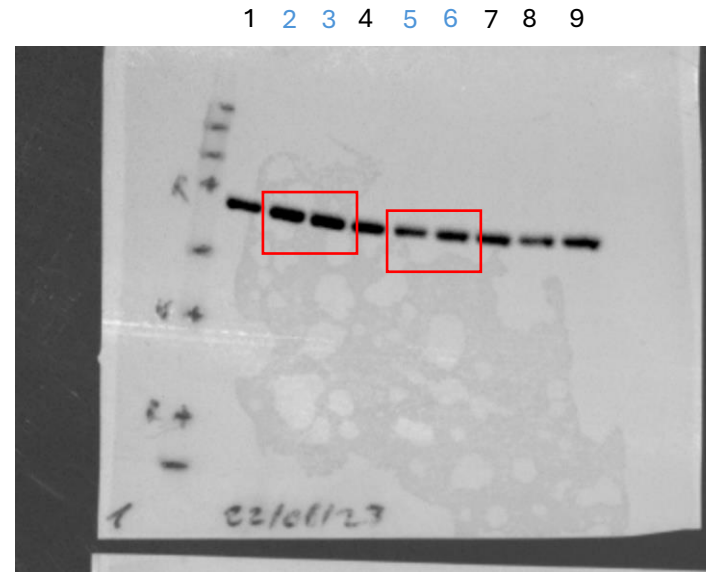

## Anti-IGF2BP3

- 1-
  - 2- Mock 48hpi
  - 3- Mock 72hpi
  - 4-
  - 5- ZIKV 48hpi
  - 6- ZIKV 72hpi
  - 7-
  - 8-
  - 9-
- Use for figure
- Use for figure

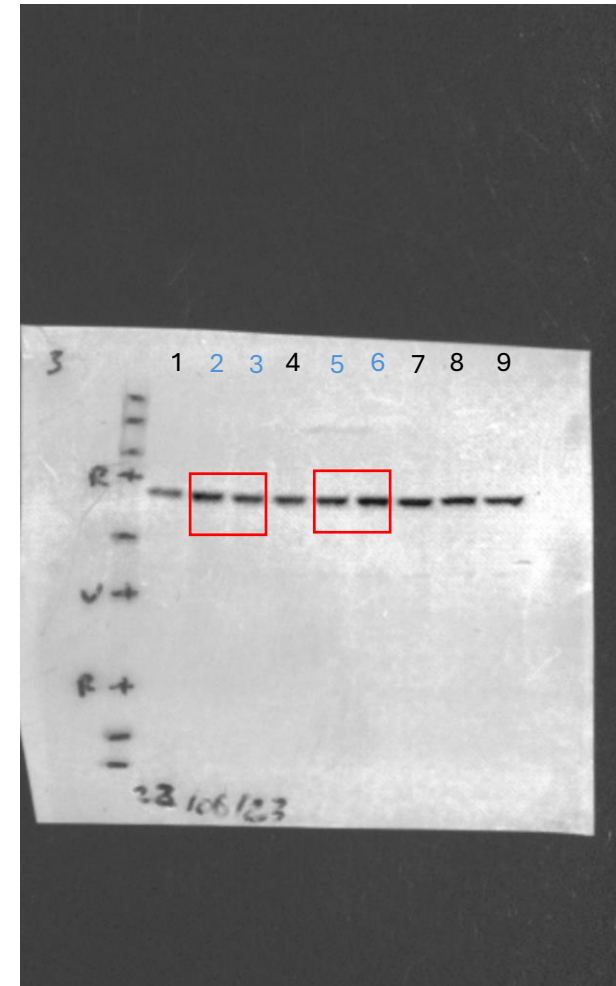

## Anti-DDX3

- 1-
  - 2- Mock 48hpi
  - 3- Mock 72hpi
  - 4-
  - 5- ZIKV 48hpi
  - 6- ZIKV 72hpi
  - 7-
  - 8-
  - 9-
- Use for figure
- Use for figure

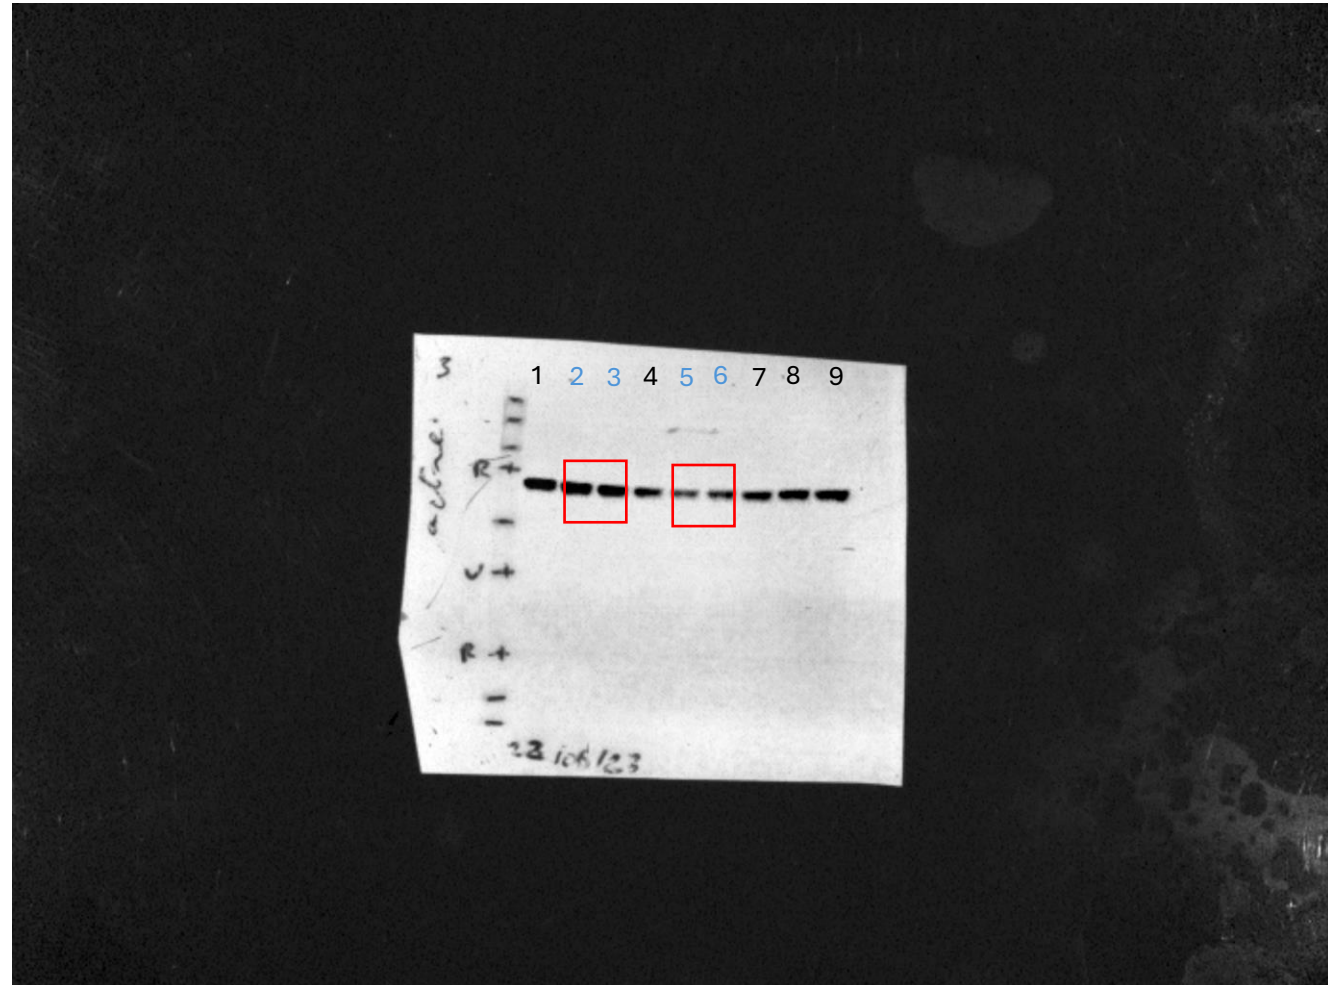

## Anti-DDX5

- 1-
  - 2- Mock 48hpi
  - 3- Mock 72hpi
  - 4-
  - 5- ZIKV 48hpi
  - 6- ZIKV 72hpi
  - 7-
  - 8-
  - 9-
- Use for figure
- Use for figure

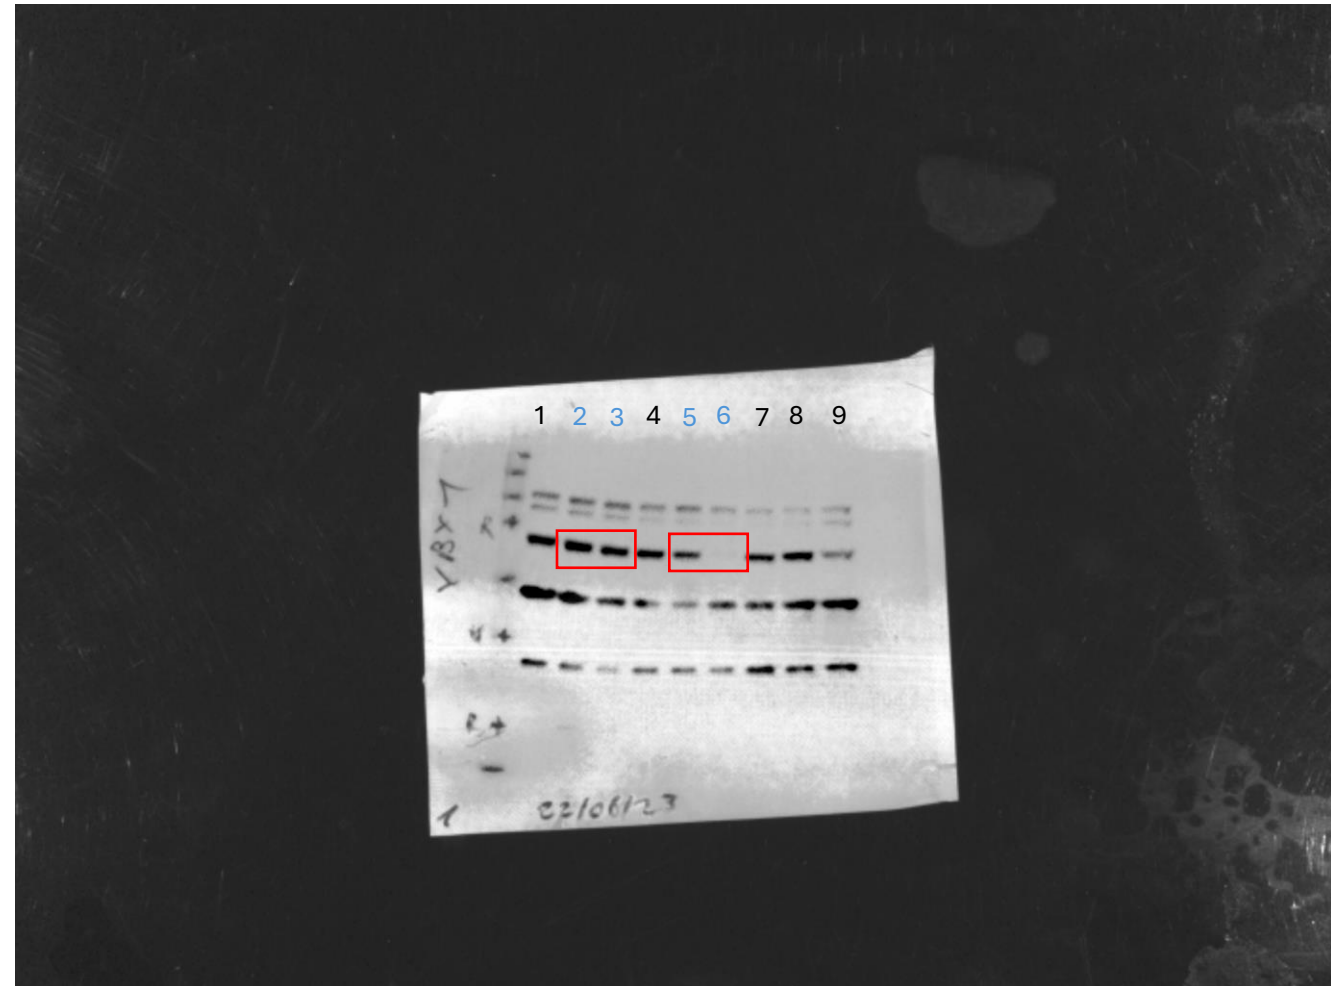

## Anti-NS3

- 1-
  - 2- Mock 48hpi
  - 3- Mock 72hpi
  - 4-
  - 5- ZIKV 48hpi
  - 6- ZIKV 72hpi
  - 7-
  - 8-
  - 9-
- Use for figure
- Use for figure

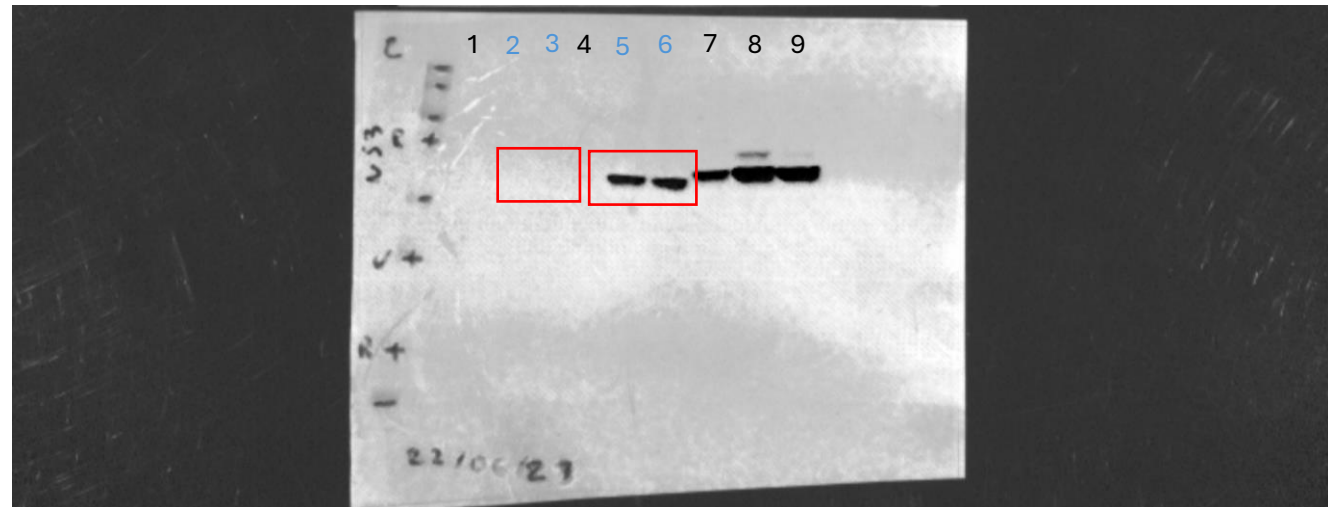

## Anti-actin

- 1-
  - 2- Mock 48hpi
  - 3- Mock 72hpi
  - 4-
  - 5- ZIKV 48hpi
  - 6- ZIKV 72hpi
  - 7-
  - 8-
  - 9-
- Use for figure
- Use for figure

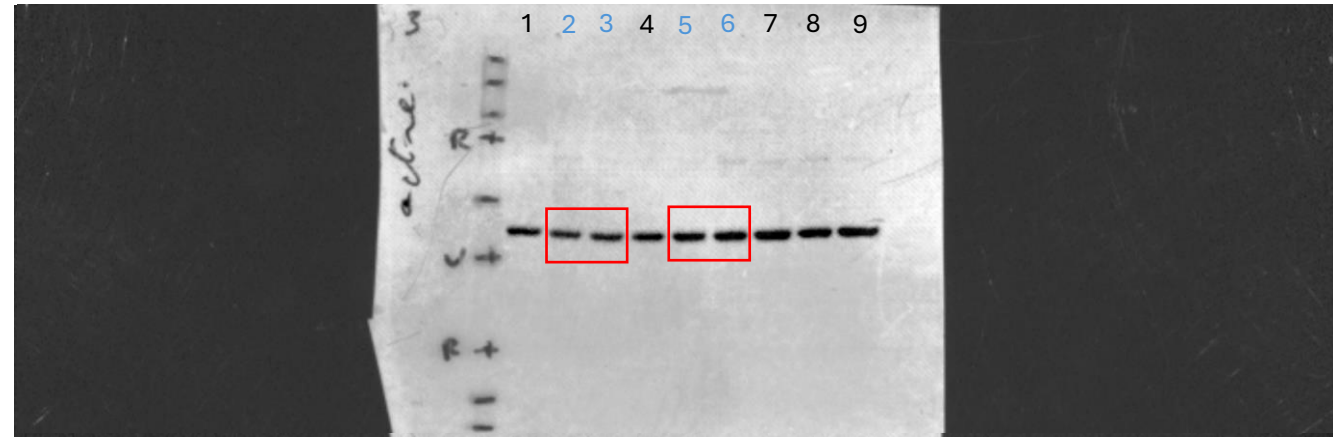



Figure 4C

## Anti-HA

### Cell extracts

- 1- Mock IGF2BP2-HA (-)
- 2- Mock IGF2BP2-HA (+)
- 3- ZIKV H/PF/2013 IGF2BP2-HA (-)
- 4- ZIKV H/PF/2013 IGF2BP2-HA (+)
- 5- ZIKV MR766 IGF2BP2-HA (-)
- 6- ZIKV MR766 IGF2BP2-HA (+)

Use for figure

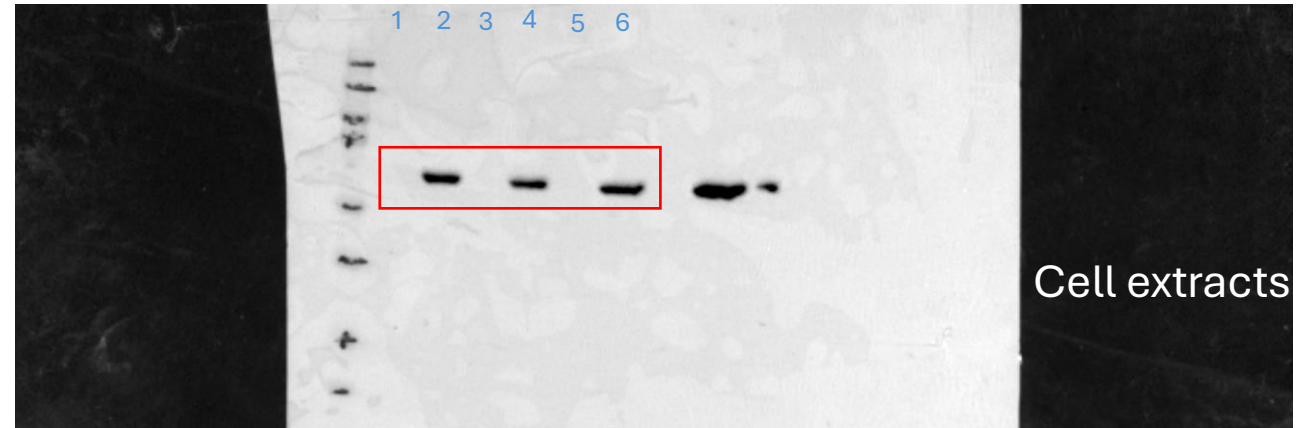

## Anti-IGF2BP2

### Cell extracts

- 1- Mock IGF2BP2-HA (-)
- 2- Mock IGF2BP2-HA (+)
- 3- ZIKV H/PF/2013 IGF2BP2-HA (-)
- 4- ZIKV H/PF/2013 IGF2BP2-HA (+)
- 5- ZIKV MR766 IGF2BP2-HA (-)
- 6- ZIKV MR766 IGF2BP2-HA (+)

Use for figure

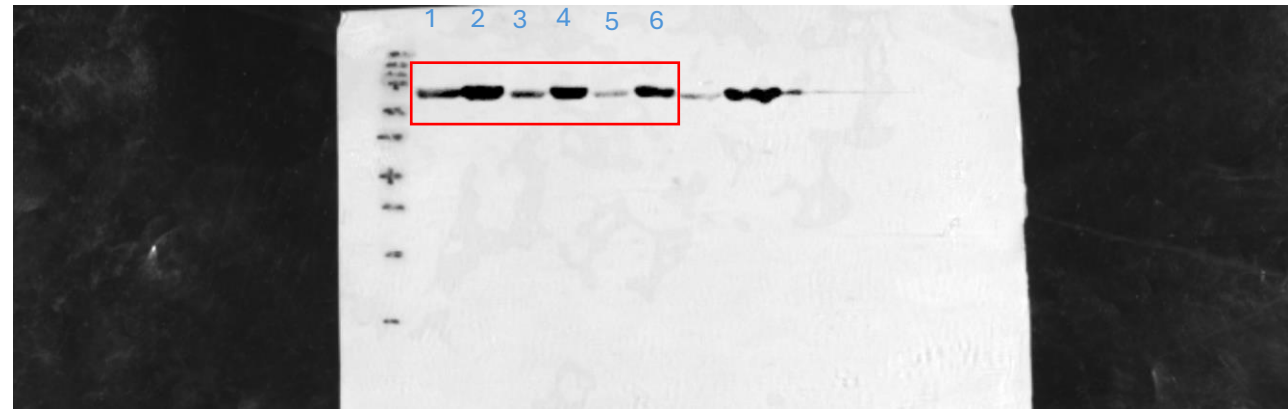

## Anti-NS5 ZIKV

### Cell extracts

- 1- Mock IGF2BP2-HA (-)
- 2- Mock IGF2BP2-HA (+)
- 3- ZIKV H/PF/2013 IGF2BP2-HA (-)
- 4- ZIKV H/PF/2013 IGF2BP2-HA (+)
- 5- ZIKV MR766 IGF2BP2-HA (-)
- 6- ZIKV MR766 IGF2BP2-HA (+)

Use for figure

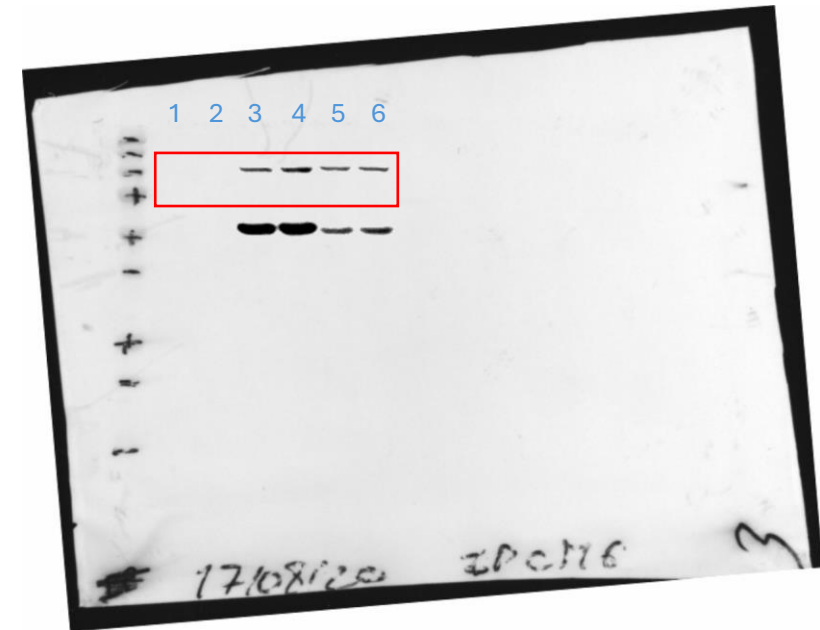

## Anti-NS3

### Cell extracts

- 1- Mock IGF2BP2-HA (-)
- 2- Mock IGF2BP2-HA (+)
- 3- ZIKV H/PF/2013 IGF2BP2-HA (-)
- 4- ZIKV H/PF/2013 IGF2BP2-HA (+)
- 5- ZIKV MR766 IGF2BP2-HA (-)
- 6- ZIKV MR766 IGF2BP2-HA (+)

Use for figure

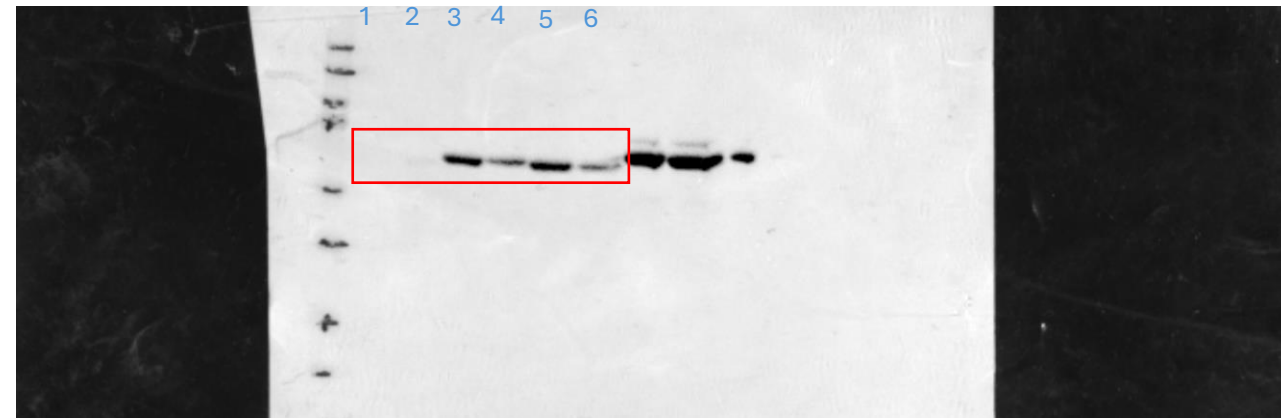

## Anti-NS5 ZIKV

### Cell extracts

- 1- Mock IGF2BP2-HA (-)
- 2- Mock IGF2BP2-HA (+)
- 3- ZIKV H/PF/2013 IGF2BP2-HA (-)
- 4- ZIKV H/PF/2013 IGF2BP2-HA (+)
- 5- ZIKV MR766 IGF2BP2-HA (-)
- 6- ZIKV MR766 IGF2BP2-HA (+)

Use for figure

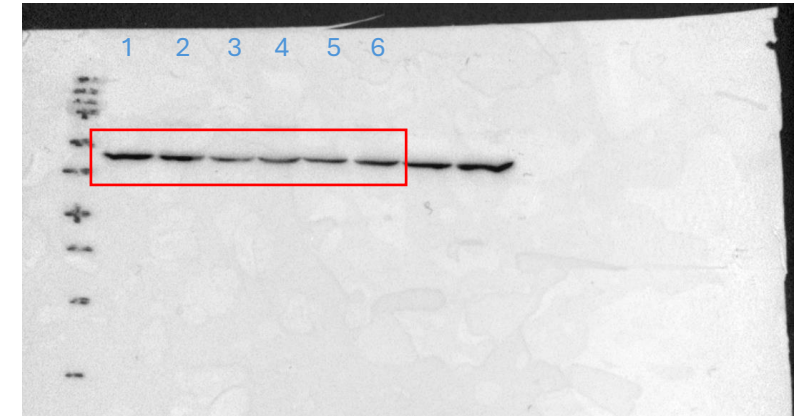

## Anti-HA

### IP anti-HA

- 1- Mock IGF2BP2-HA (-)
- 2- Mock IGF2BP2-HA (+)
- 3- ZIKV H/PF/2013 IGF2BP2-HA (-)
- 4- ZIKV H/PF/2013 IGF2BP2-HA (+)
- 5- ZIKV MR766 IGF2BP2-HA (-)
- 6- ZIKV MR766 IGF2BP2-HA (+)

Use for figure

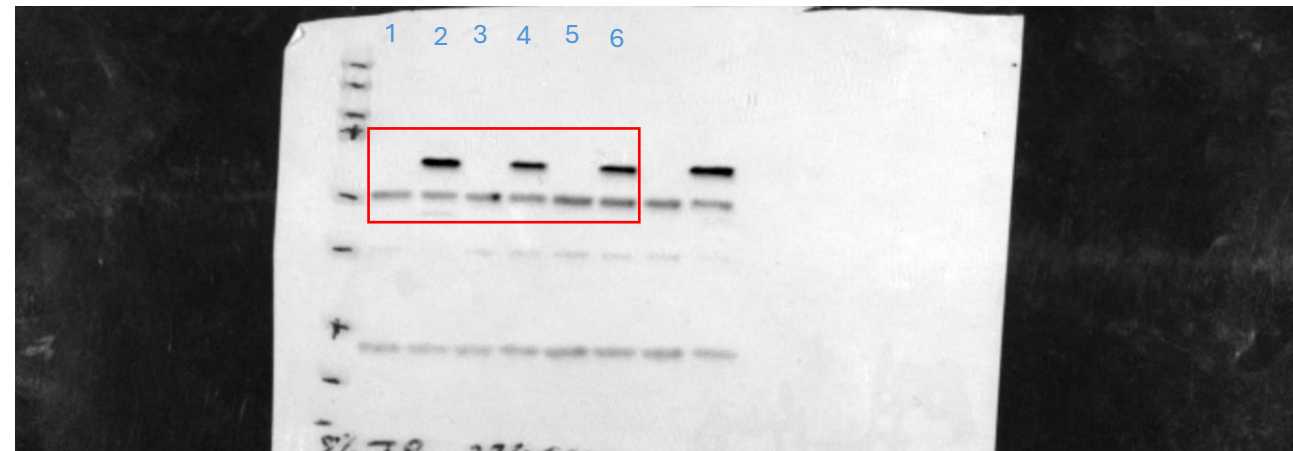

## Anti-IGF2BP2

### IP anti-HA

- 1- Mock IGF2BP2-HA (-)
- 2- Mock IGF2BP2-HA (+)
- 3- ZIKV H/PF/2013 IGF2BP2-HA (-)
- 4- ZIKV H/PF/2013 IGF2BP2-HA (+)
- 5- ZIKV MR766 IGF2BP2-HA (-)
- 6- ZIKV MR766 IGF2BP2-HA (+)

Use for figure

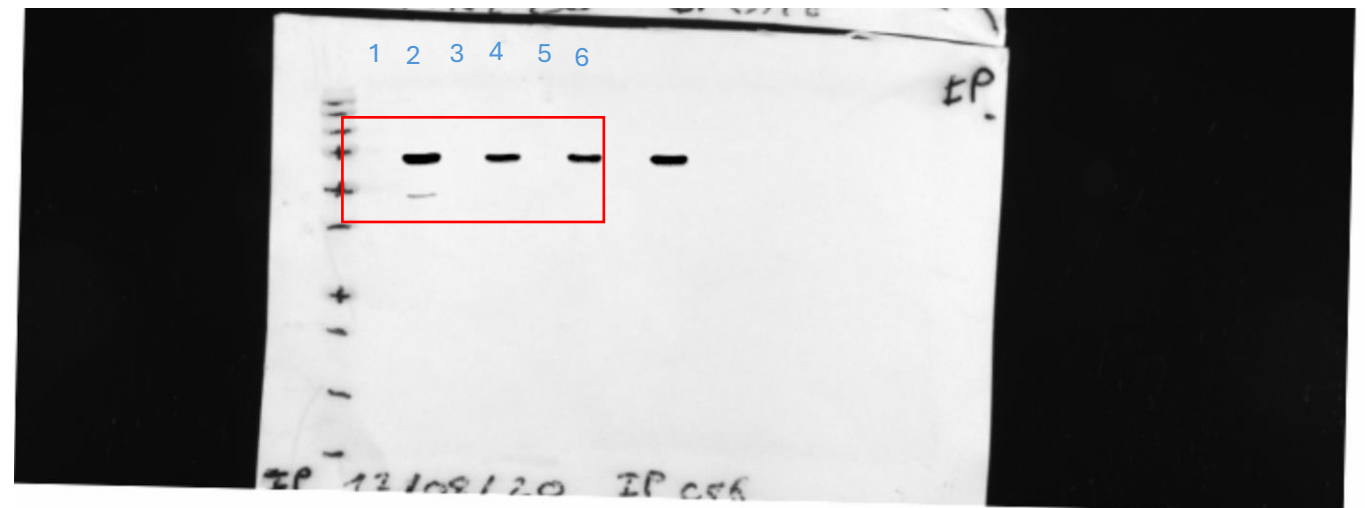



## Anti-NS5

### IP anti-HA

- 1- Mock IGF2BP2-HA (-)
- 2- Mock IGF2BP2-HA (+)
- 3- ZIKV H/PF/2013 IGF2BP2-HA (-)
- 4- ZIKV H/PF/2013 IGF2BP2-HA (+)
- 5- ZIKV MR766 IGF2BP2-HA (-)
- 6- ZIKV MR766 IGF2BP2-HA (+)

Use for figure

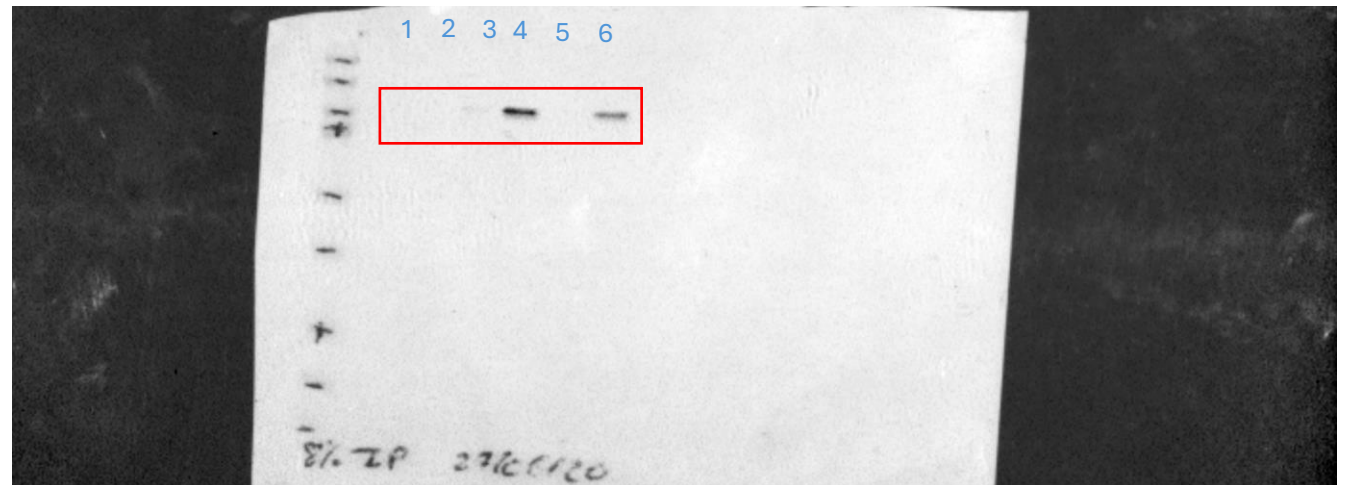

## Anti-NS3

### IP anti-HA

- 1- Mock IGF2BP2-HA (-)
- 2- Mock IGF2BP2-HA (+)
- 3- ZIKV H/PF/2013 IGF2BP2-HA (-)
- 4- ZIKV H/PF/2013 IGF2BP2-HA (+)
- 5- ZIKV MR766 IGF2BP2-HA (-)
- 6- ZIKV MR766 IGF2BP2-HA (+)

Use for figure

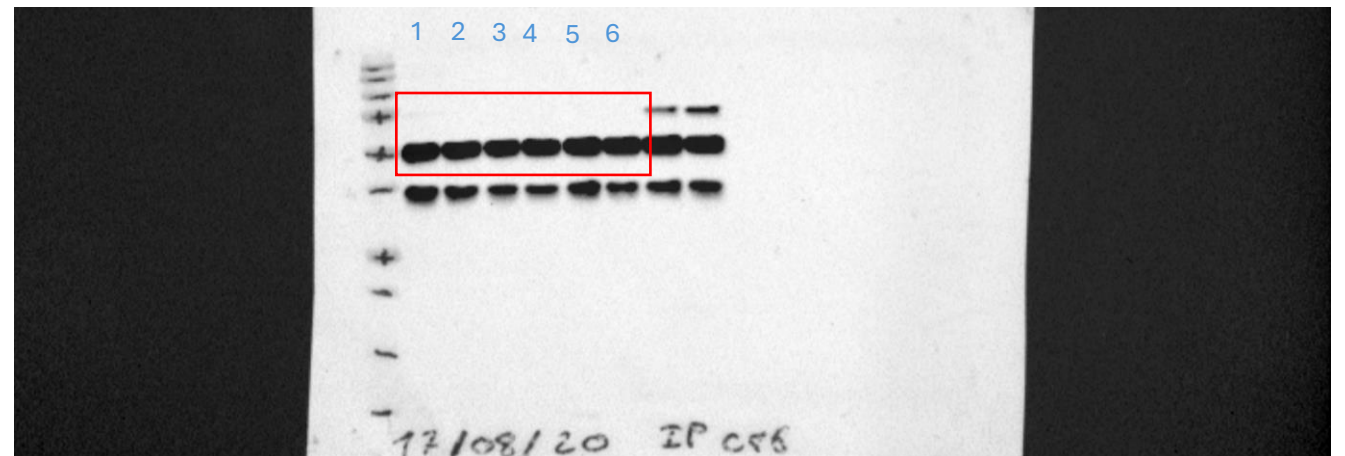

Supplement: fig4-data2 [file elife-94347-fig4-data2-v1.zip]
