# Supplementary material for: Zika virus remodels and hijacks IGF2BP2 ribonucleoprotein complex to promote viral replication organelle biogenesis
Source: eLife journal article supplement (doi:10.7554/elife.94347), 2024-02-19

Figure 8A

Anti-HA

Cell extracts

- 1- Mock IGF2BP2-HA (-)
- 2- Mock IGF2BP2-HA (+)
- 3- ZIKV H/PF/2013 IGF2BP2-HA (-)
- 4- ZIKV H/PF/2013 IGF2BP2-HA (+)

Use for figure

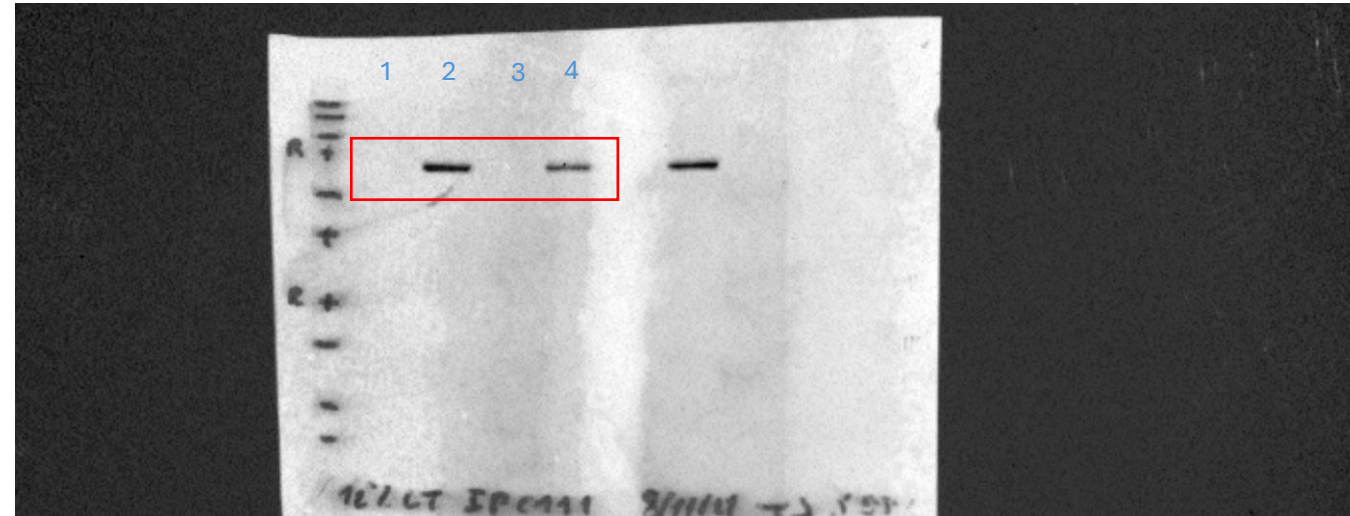

## Anti-IGF2BP2

### Cell extracts

- 1- Mock IGF2BP2-HA (-)
- 2- Mock IGF2BP2-HA (+)
- 3- ZIKV H/PF/2013 IGF2BP2-HA (-)
- 4- ZIKV H/PF/2013 IGF2BP2-HA (+)

Use for figure

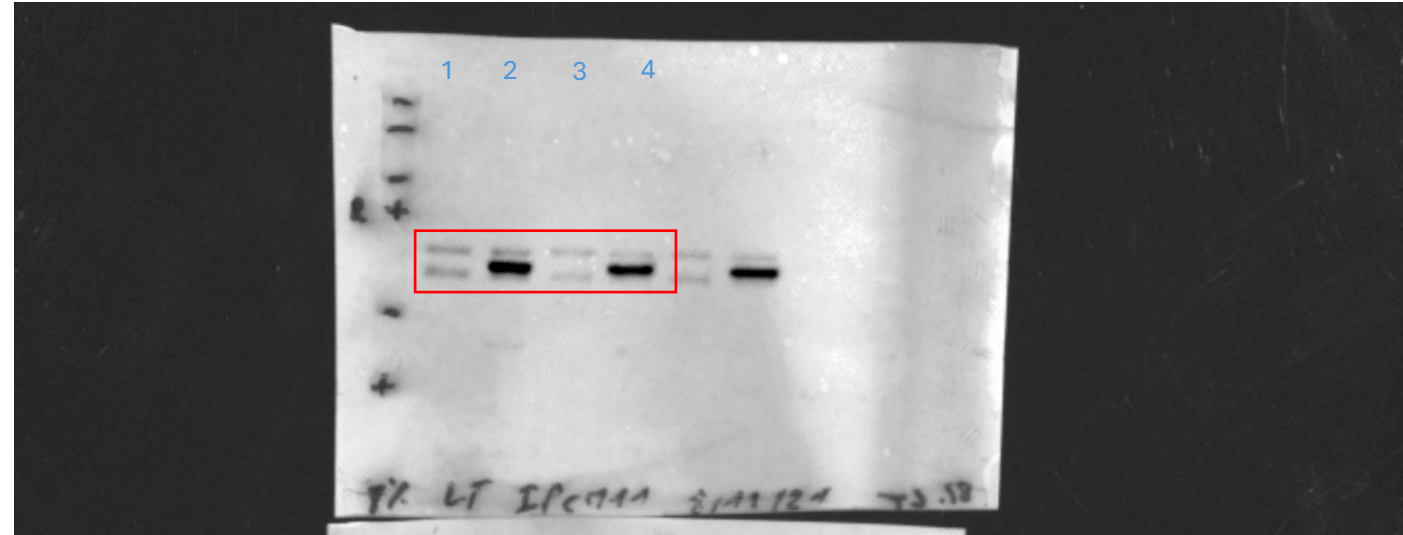

## Anti-IGF2BP1

### Cell extracts

- 1- Mock IGF2BP2-HA (-)
- 2- Mock IGF2BP2-HA (+)
- 3- ZIKV H/PF/2013 IGF2BP2-HA (-)
- 4- ZIKV H/PF/2013 IGF2BP2-HA (+)

Use for figure

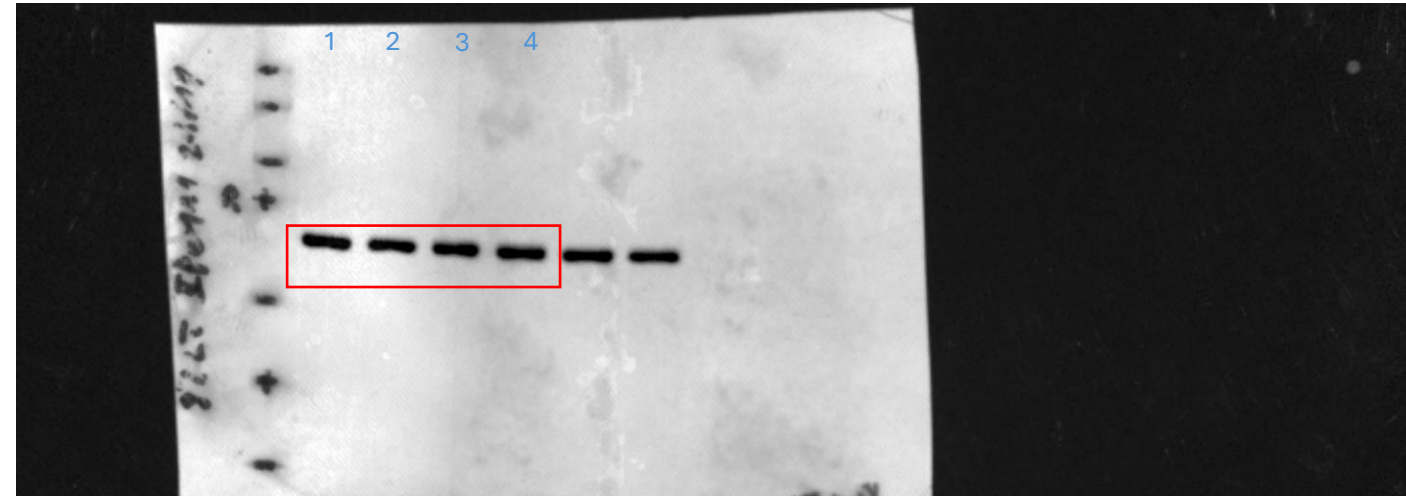

## Anti-IGF2BP3

## Cell extracts

- 1- Mock IGF2BP2-HA (-)
- 2- Mock IGF2BP2-HA (+)
- 3- ZIKV H/PF/2013 IGF2BP2-HA (-)
- 4- ZIKV H/PF/2013 IGF2BP2-HA (+)

Use for figure

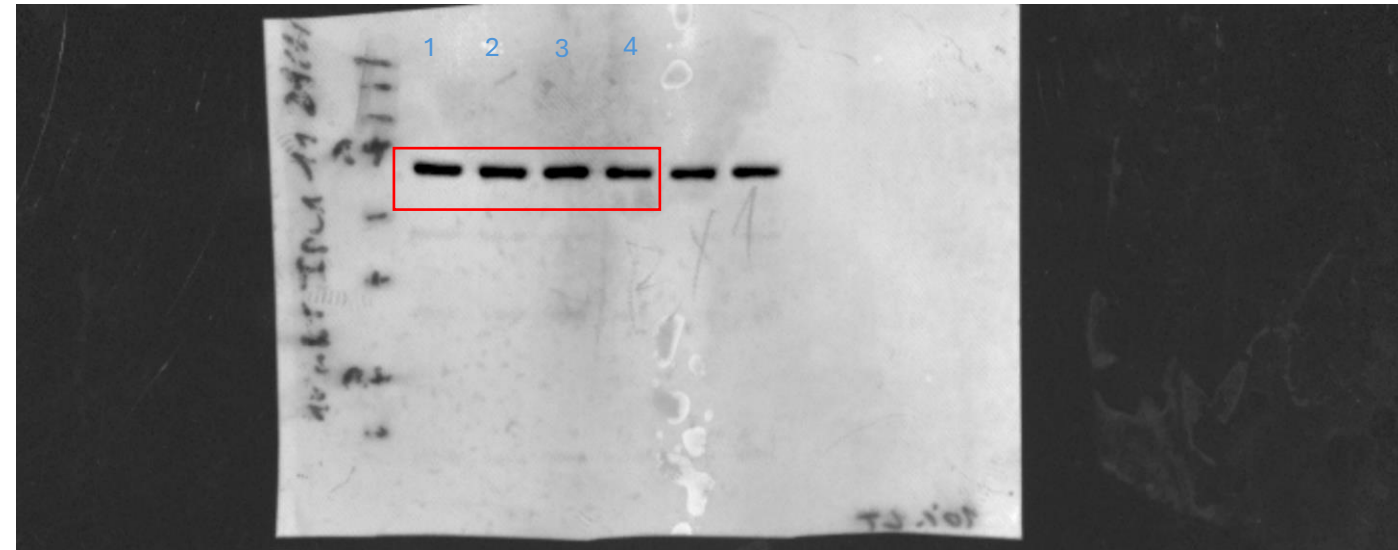

## Anti-YBX1

### Cell extracts

- 1- Mock IGF2BP2-HA (-)
- 2- Mock IGF2BP2-HA (+)
- 3- ZIKV H/PF/2013 IGF2BP2-HA (-)
- 4- ZIKV H/PF/2013 IGF2BP2-HA (+)

Use for figure

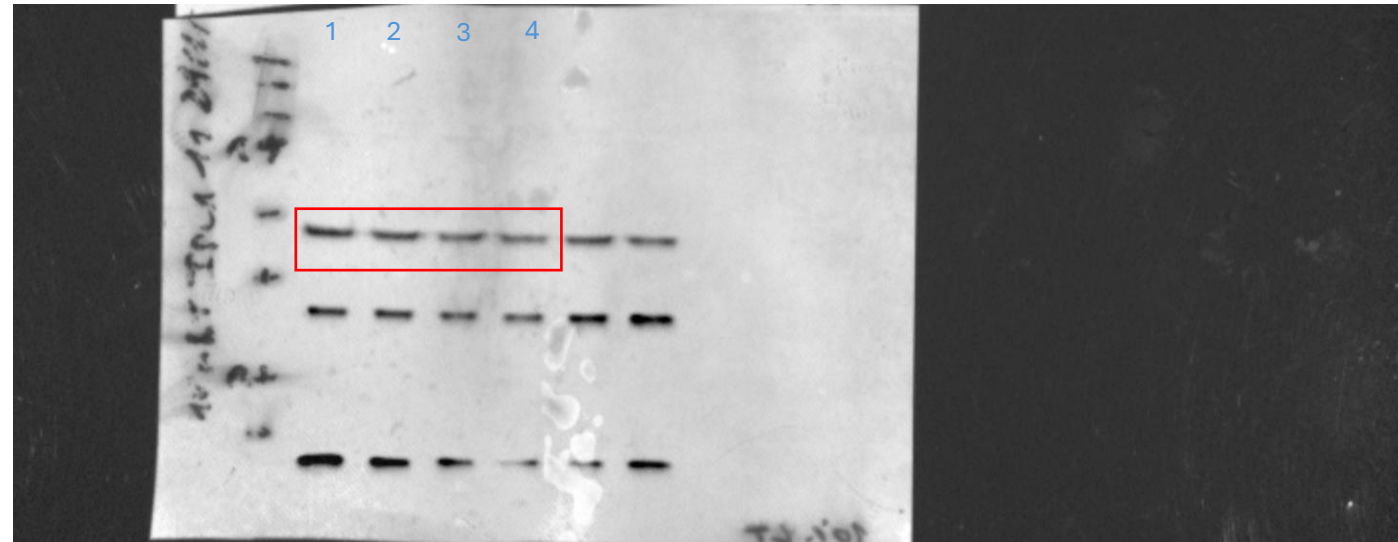

## Anti-NS5 ZIKV

### Cell extracts

- 1- Mock IGF2BP2-HA (-)
- 2- Mock IGF2BP2-HA (+)
- 3- ZIKV H/PF/2013 IGF2BP2-HA (-)
- 4- ZIKV H/PF/2013 IGF2BP2-HA (+)

Use for figure

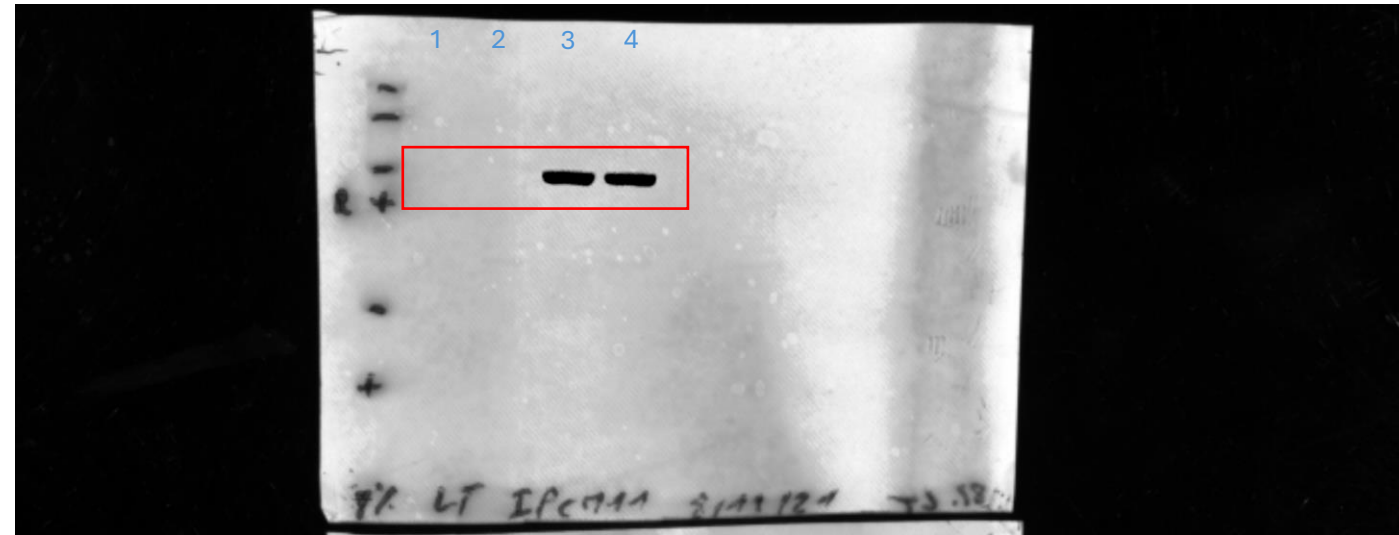

## Anti-actin

### Cell extracts

- 1- Mock IGF2BP2-HA (-)
- 2- Mock IGF2BP2-HA (+)
- 3- ZIKV H/PF/2013 IGF2BP2-HA (-)
- 4- ZIKV H/PF/2013 IGF2BP2-HA (+)

Use for figure

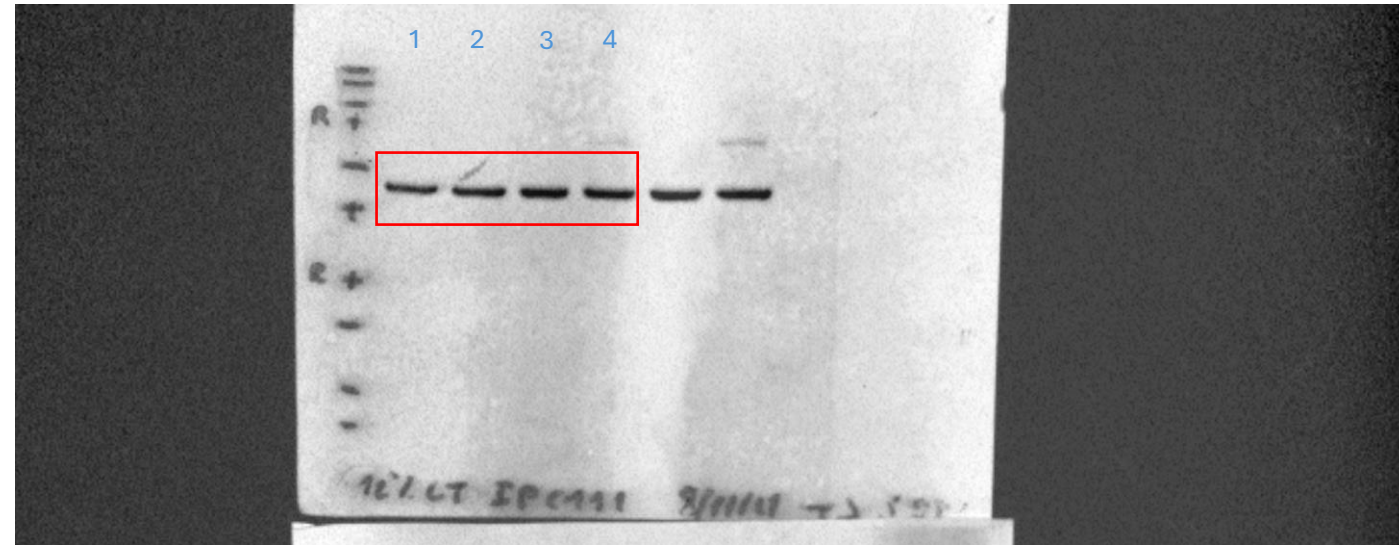



Anti-HA

IP anti HA

- 1- Mock IGF2BP2-HA (-)
- 2- Mock IGF2BP2-HA (+)
- 3- ZIKV H/PF/2013 IGF2BP2-HA (-)
- 4- ZIKV H/PF/2013 IGF2BP2-HA (+)

Use for figure

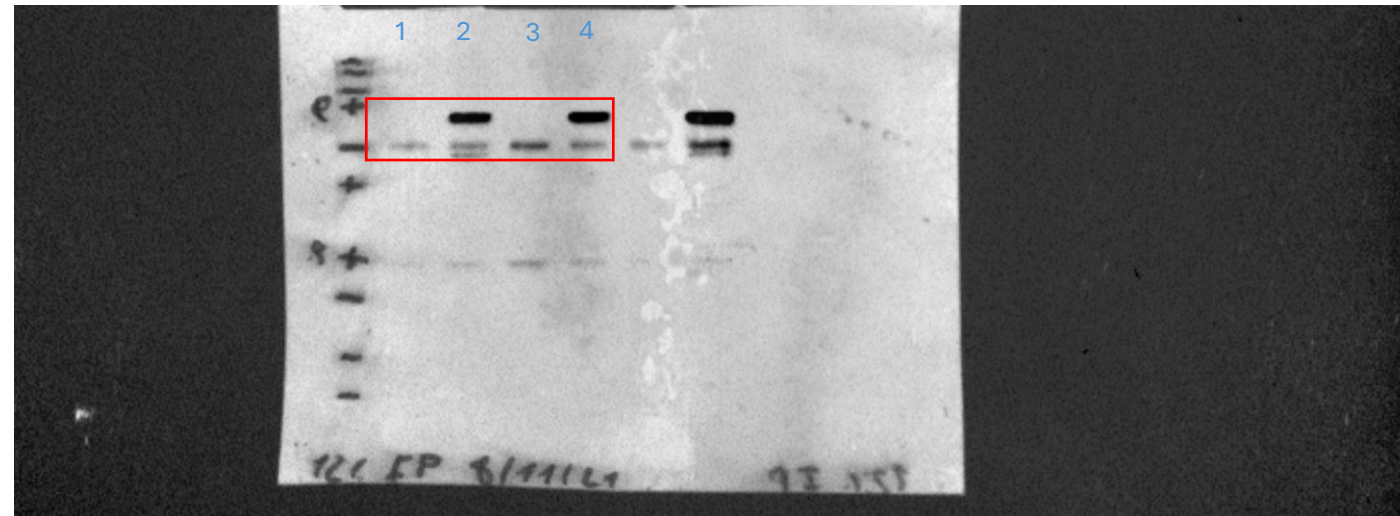

## Anti-IGF2BP2

### IP anti-HA

- 1- Mock IGF2BP2-HA (-)
- 2- Mock IGF2BP2-HA (+)
- 3- ZIKV H/PF/2013 IGF2BP2-HA (-)
- 4- ZIKV H/PF/2013 IGF2BP2-HA (+)

Use for figure

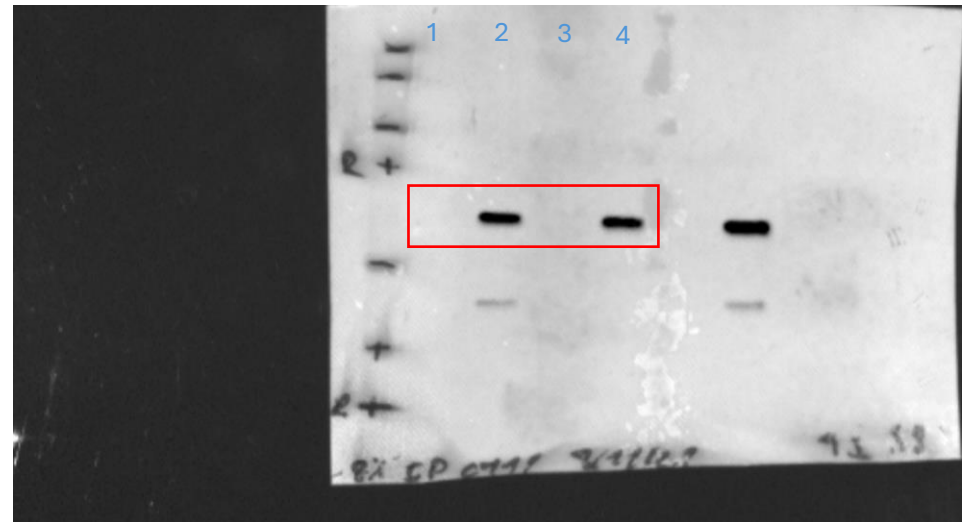

## Anti-IGF2BP1

IP anti-HA

- 1- Mock IGF2BP2-HA (-)
- 2- Mock IGF2BP2-HA (+)
- 3- ZIKV H/PF/2013 IGF2BP2-HA (-)
- 4- ZIKV H/PF/2013 IGF2BP2-HA (+)

Use for figure

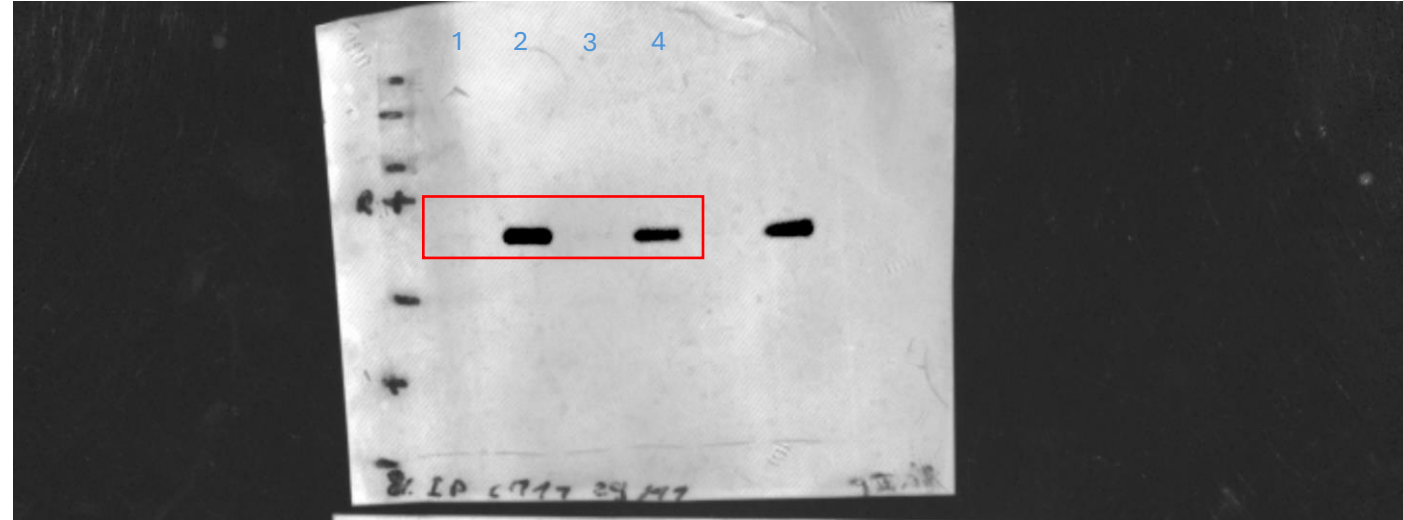

## Anti-IGF2BP3

IP anti-HA

- 1- Mock IGF2BP2-HA (-)
- 2- Mock IGF2BP2-HA (+)
- 3- ZIKV H/PF/2013 IGF2BP2-HA (-)
- 4- ZIKV H/PF/2013 IGF2BP2-HA (+)

Use for figure

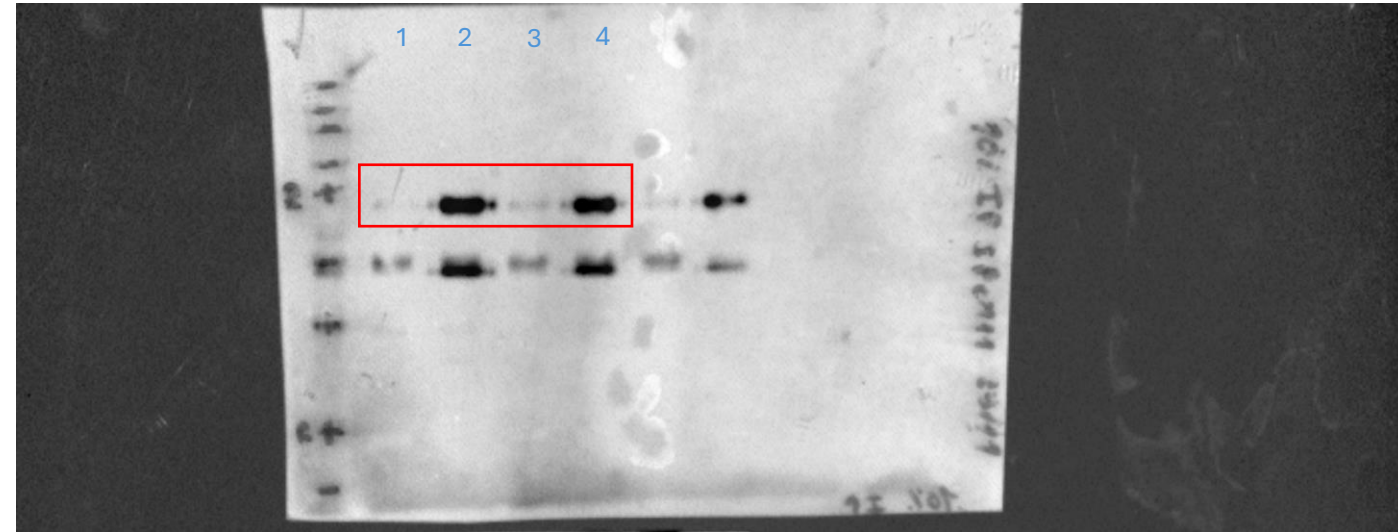

Anti-YBX1

IP anti-HA

- 1- Mock IGF2BP2-HA (-)
- 2- Mock IGF2BP2-HA (+)
- 3- ZIKV H/PF/2013 IGF2BP2-HA (-)
- 4- ZIKV H/PF/2013 IGF2BP2-HA (+)

Use for figure

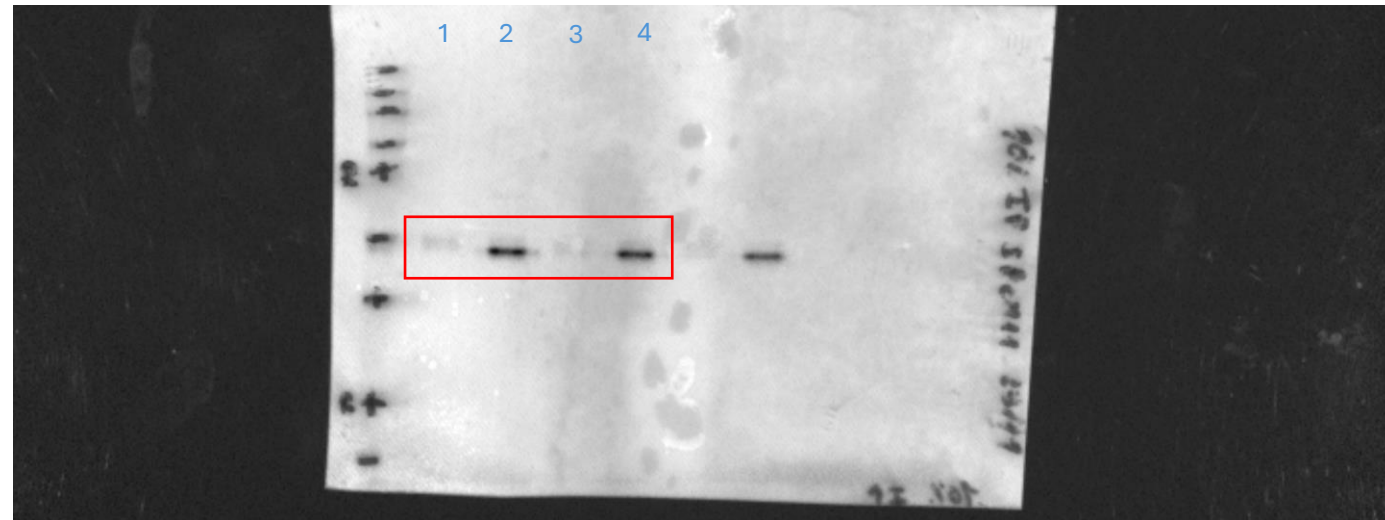

Anti-NS5 ZIKV

IP anti-HA

- 1- Mock IGF2BP2-HA (-)
  - 2- Mock IGF2BP2-HA (+)
  - 3- ZIKV H/PF/2013 IGF2BP2-HA (-)
  - 4- ZIKV H/PF/2013 IGF2BP2-HA (+)
- } Use for figure

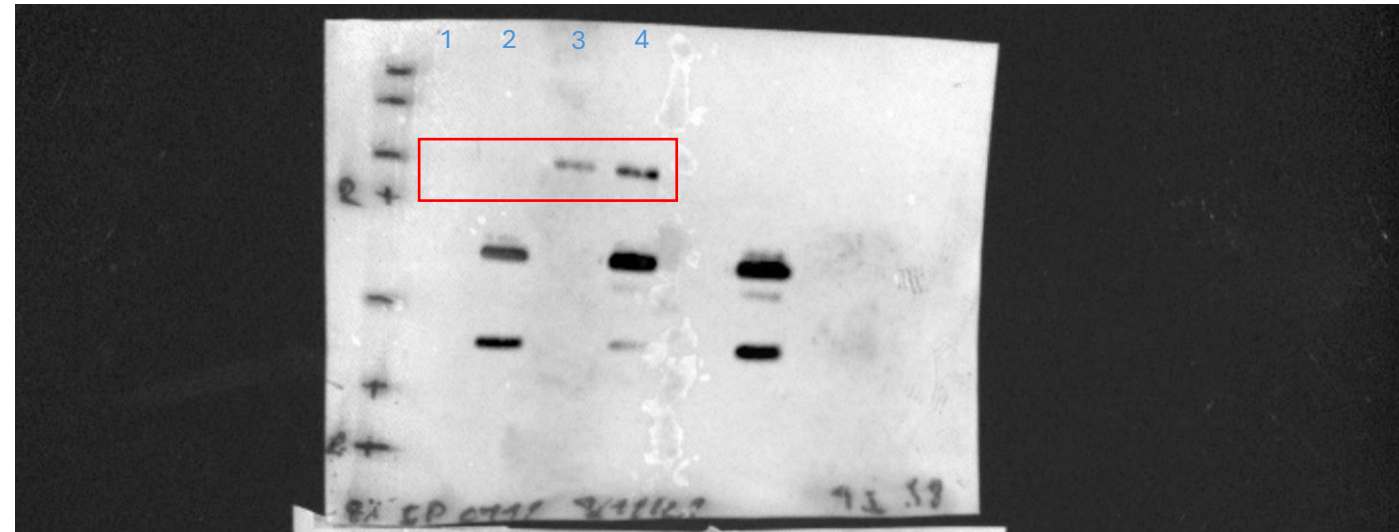

Supplement: fig8-data2 [file Figure 8-source data 2.pdf › Figure 8-source data 2.pdf]
