# Supplementary material for: Zika virus remodels and hijacks IGF2BP2 ribonucleoprotein complex to promote viral replication organelle biogenesis
Source: eLife journal article supplement (doi:10.7554/elife.94347), 2024-02-19

Figure 8-fig supplement 3A

## Anti-IGF2BP2

### Cell extracts

- 1- Mock IGF2BP2-HA (-) Rnase A(-)
- 2- Mock IGF2BP2-HA (-) RNase A (+)
- 3- Mock IGF2BP2-HA (+) Rnase A(-)
- 4- Mock IGF2BP2-HA (+) Rnase A(+)
- 5- ZIKV IGF2BP2-HA (-) Rnase A(-)
- 6- ZIKV IGF2BP2-HA (-) RNase A (+)
- 7- ZIKV IGF2BP2-HA (+) Rnase A(-)
- 8- ZIKV IGF2BP2-HA (+) Rnase A(+)

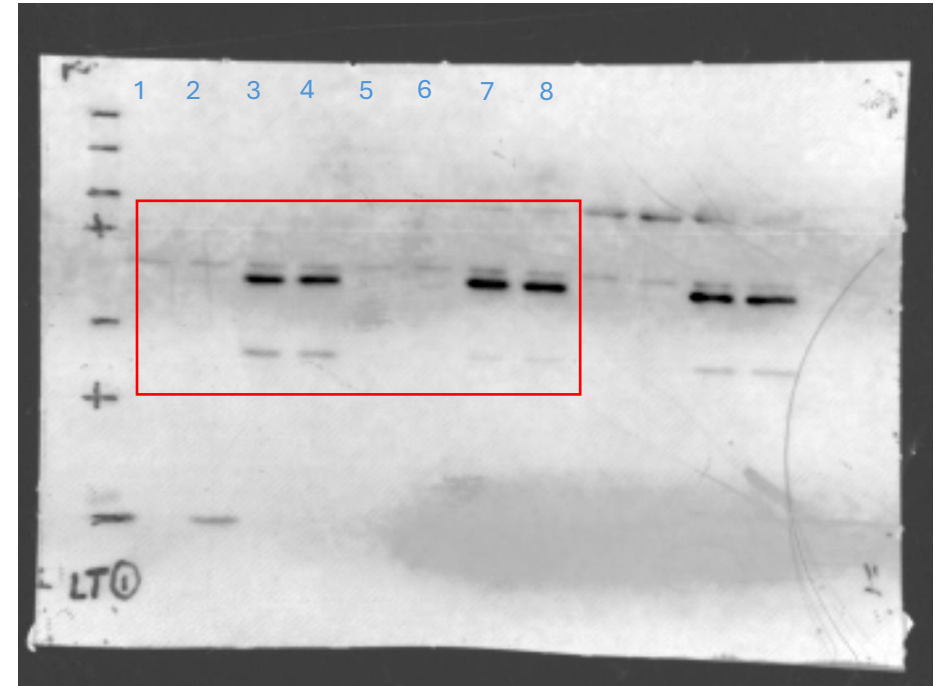

## Anti-HA

### Cell extracts

- 1- Mock IGF2BP2-HA (-) Rnase A(-)
- 2- Mock IGF2BP2-HA (-) RNase A (+)
- 3- Mock IGF2BP2-HA (+) Rnase A(-)
- 4- Mock IGF2BP2-HA (+) Rnase A(+)
- 5- ZIKV IGF2BP2-HA (-) Rnase A(-)
- 6- ZIKV IGF2BP2-HA (-) RNase A (+)
- 7- ZIKV IGF2BP2-HA (+) Rnase A(-)
- 8- ZIKV IGF2BP2-HA (+) Rnase A(+)

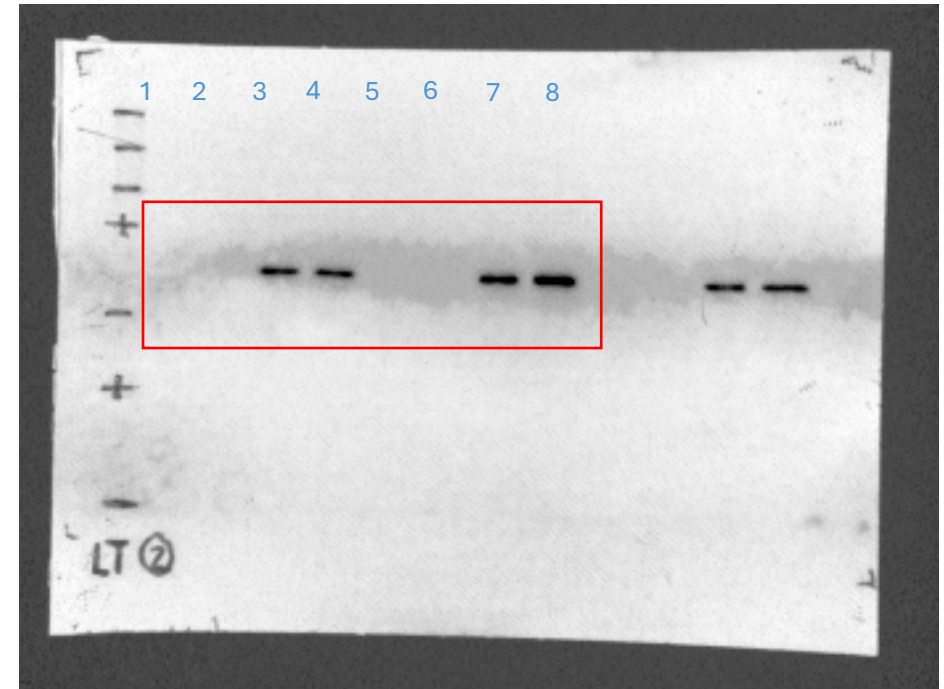

## Anti-ZIKV NS5

### Cell extracts

- 1- Mock IGF2BP2-HA (-) Rnase A(-)
- 2- Mock IGF2BP2-HA (-) RNase A (+)
- 3- Mock IGF2BP2-HA (+) Rnase A(-)
- 4- Mock IGF2BP2-HA (+) Rnase A(+)
- 5- ZIKV IGF2BP2-HA (-) Rnase A(-)
- 6- ZIKV IGF2BP2-HA (-) RNase A (+)
- 7- ZIKV IGF2BP2-HA (+) Rnase A(-)
- 8- ZIKV IGF2BP2-HA (+) Rnase A(+)

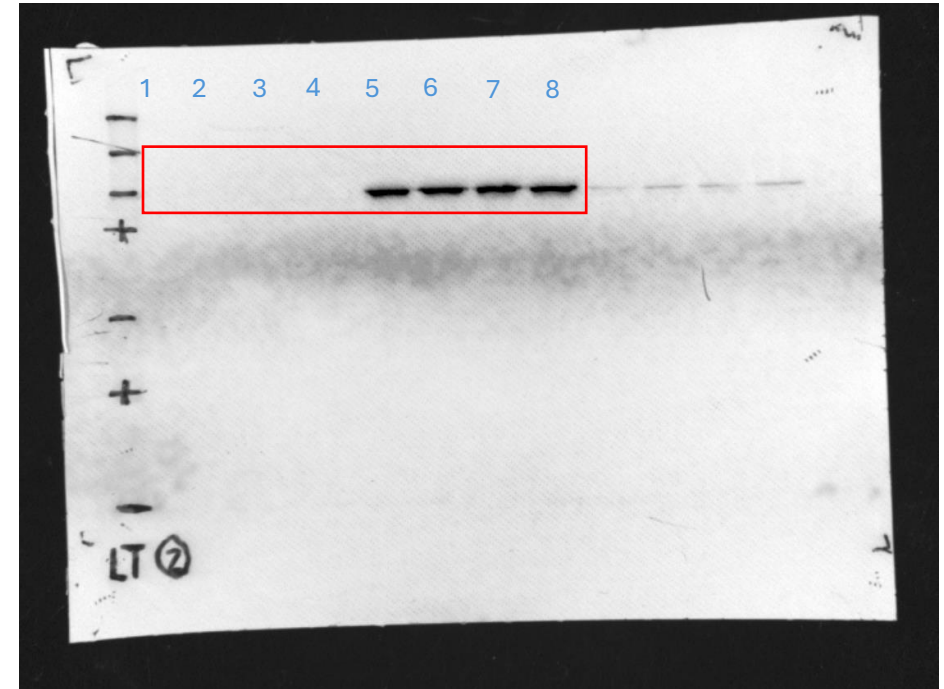

## Anti-ATL2

### Cell extracts

- 1- Mock IGF2BP2-HA (-) Rnase A(-)
- 2- Mock IGF2BP2-HA (-) RNase A (+)
- 3- Mock IGF2BP2-HA (+) Rnase A(-)
- 4- Mock IGF2BP2-HA (+) Rnase A(+)
- 5- ZIKV IGF2BP2-HA (-) Rnase A(-)
- 6- ZIKV IGF2BP2-HA (-) RNase A (+)
- 7- ZIKV IGF2BP2-HA (+) Rnase A(-)
- 8- ZIKV IGF2BP2-HA (+) Rnase A(+)

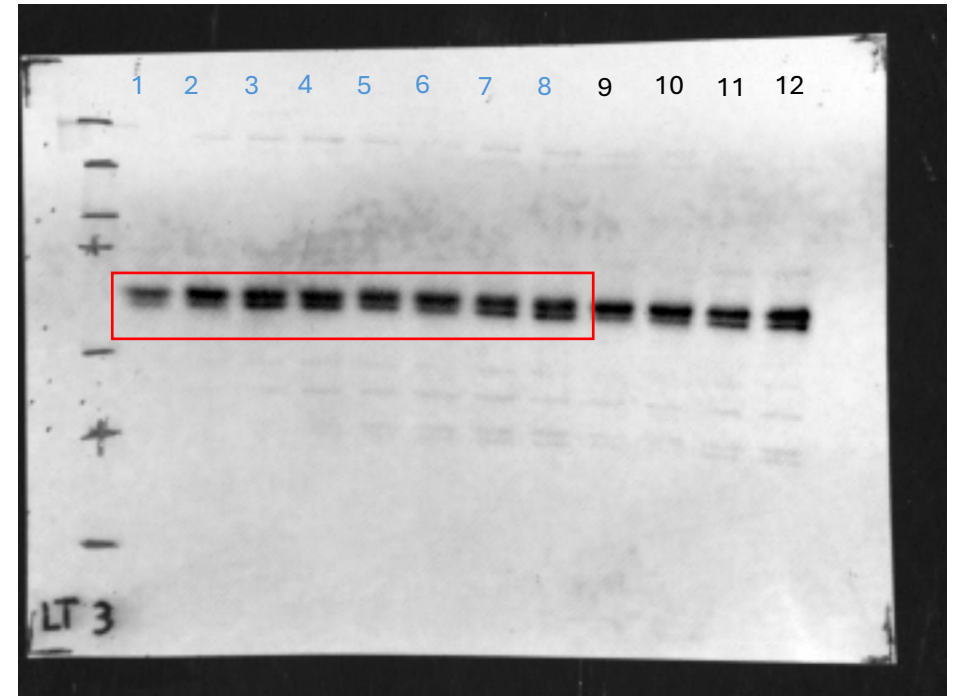

## Anti-IGF2BP1

### Cell extracts

- 1- Mock IGF2BP2-HA (-) Rnase A(-)
- 2- Mock IGF2BP2-HA (-) RNase A (+)
- 3- Mock IGF2BP2-HA (+) Rnase A(-)
- 4- Mock IGF2BP2-HA (+) Rnase A(+)
- 5- ZIKV IGF2BP2-HA (-) Rnase A(-)
- 6- ZIKV IGF2BP2-HA (-) RNase A (+)
- 7- ZIKV IGF2BP2-HA (+) Rnase A(-)
- 8- ZIKV IGF2BP2-HA (+) Rnase A(+)

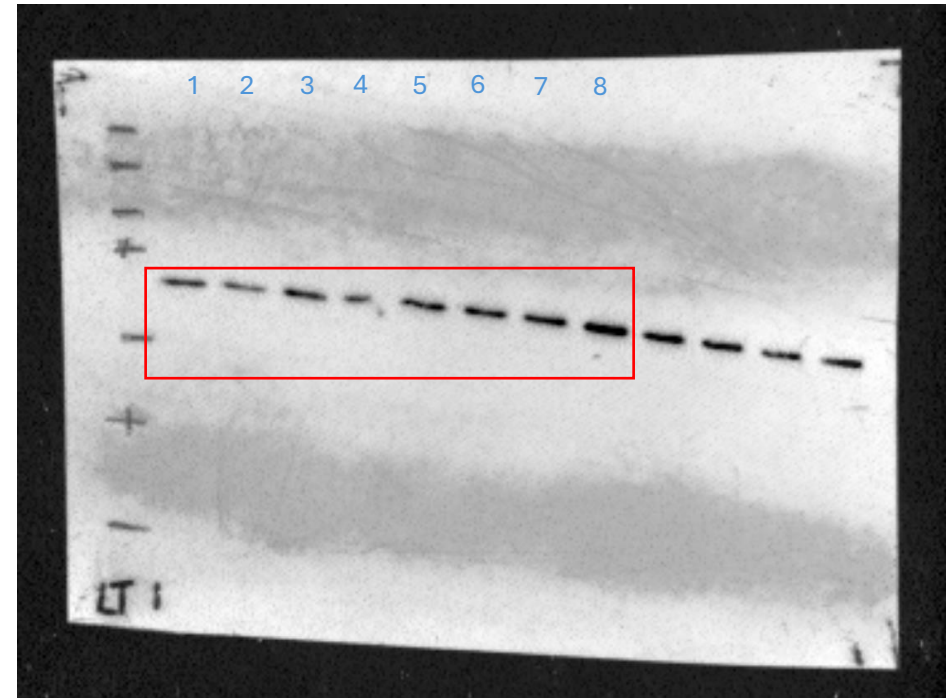

## Anti-IGF2BP3

### Cell extracts

- 1- Mock IGF2BP2-HA (-) Rnase A(-)
- 2- Mock IGF2BP2-HA (-) RNase A (+)
- 3- Mock IGF2BP2-HA (+) Rnase A(-)
- 4- Mock IGF2BP2-HA (+) Rnase A(+)
- 5- ZIKV IGF2BP2-HA (-) Rnase A(-)
- 6- ZIKV IGF2BP2-HA (-) RNase A (+)
- 7- ZIKV IGF2BP2-HA (+) Rnase A(-)
- 8- ZIKV IGF2BP2-HA (+) Rnase A(+)

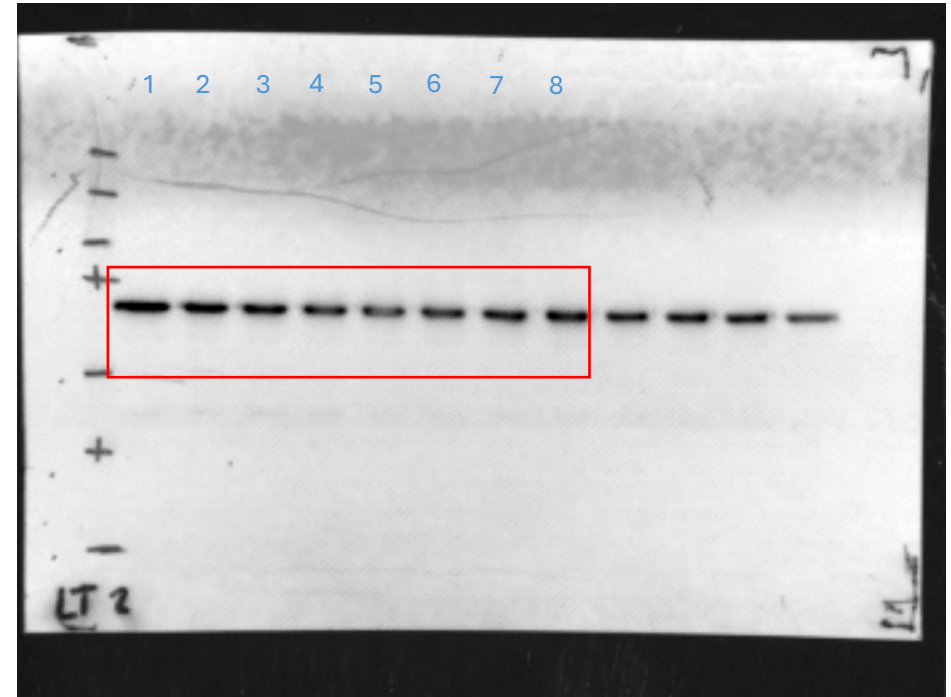

## Anti-actin

### Cell extracts

- 1- Mock IGF2BP2-HA (-) Rnase A(-)
- 2- Mock IGF2BP2-HA (-) RNase A (+)
- 3- Mock IGF2BP2-HA (+) Rnase A(-)
- 4- Mock IGF2BP2-HA (+) Rnase A(+)
- 5- ZIKV IGF2BP2-HA (-) Rnase A(-)
- 6- ZIKV IGF2BP2-HA (-) RNase A (+)
- 7- ZIKV IGF2BP2-HA (+) Rnase A(-)
- 8- ZIKV IGF2BP2-HA (+) Rnase A(+)

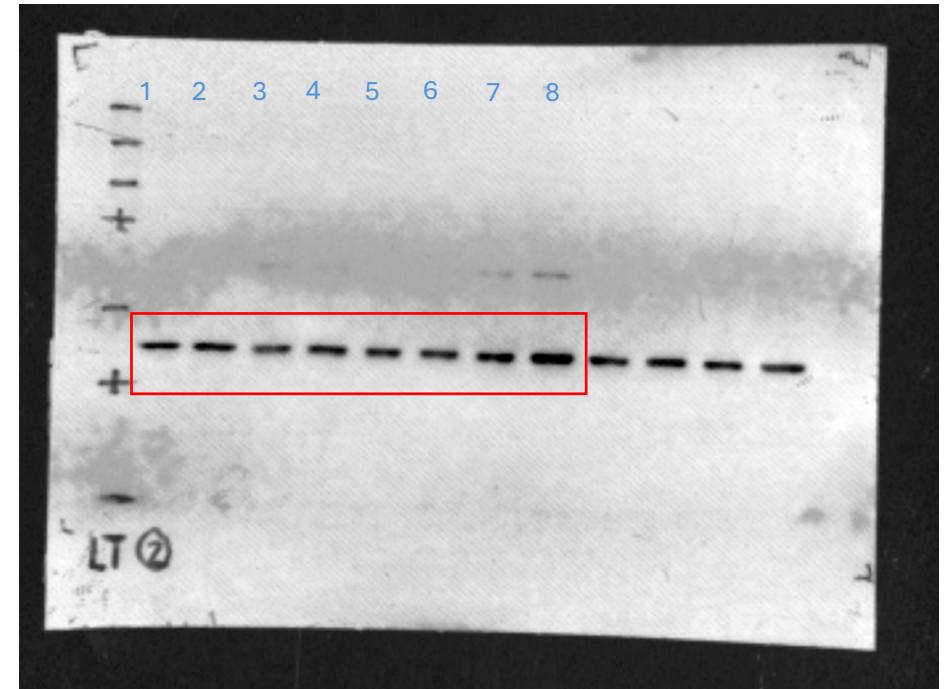

## Anti-IGF2BP2

IP anti-HA

- 1- Mock IGF2BP2-HA (-) Rnase A(-)
- 2- Mock IGF2BP2-HA (-) RNase A (+)
- 3- Mock IGF2BP2-HA (+) Rnase A(-)
- 4- Mock IGF2BP2-HA (+) Rnase A(+)
- 5- ZIKV IGF2BP2-HA (-) Rnase A(-)
- 6- ZIKV IGF2BP2-HA (-) RNase A (+)
- 7- ZIKV IGF2BP2-HA (+) Rnase A(-)
- 8- ZIKV IGF2BP2-HA (+) Rnase A(+)

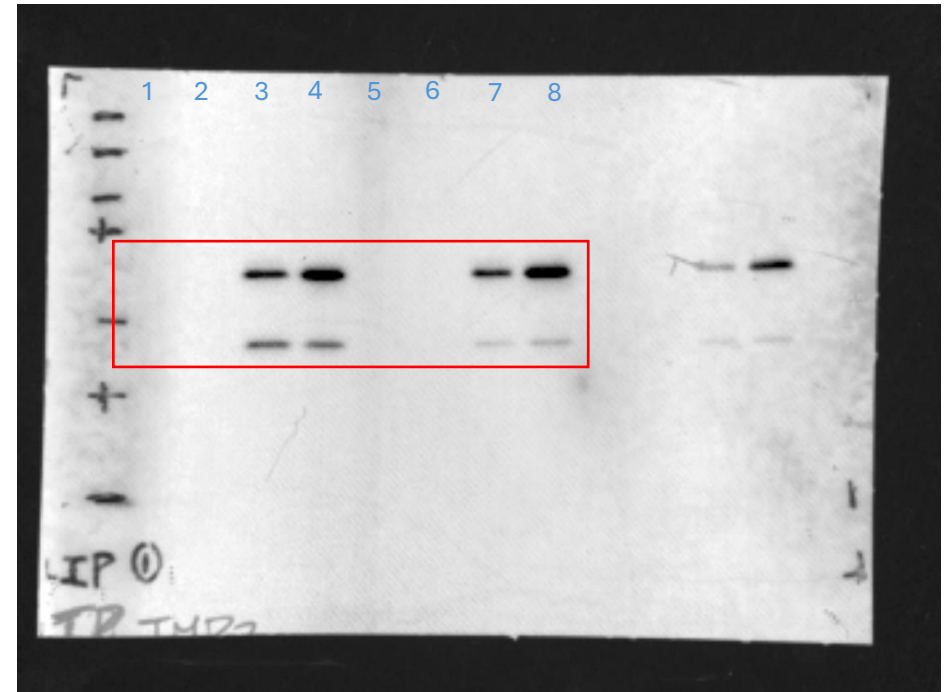

Anti-HA

IP anti-HA

- 1- Mock IGF2BP2-HA (-) Rnase A(-)
- 2- Mock IGF2BP2-HA (-) RNase A (+)
- 3- Mock IGF2BP2-HA (+) Rnase A(-)
- 4- Mock IGF2BP2-HA (+) Rnase A(+)
- 5- ZIKV IGF2BP2-HA (-) Rnase A(-)
- 6- ZIKV IGF2BP2-HA (-) RNase A (+)
- 7- ZIKV IGF2BP2-HA (+) Rnase A(-)
- 8- ZIKV IGF2BP2-HA (+) Rnase A(+)

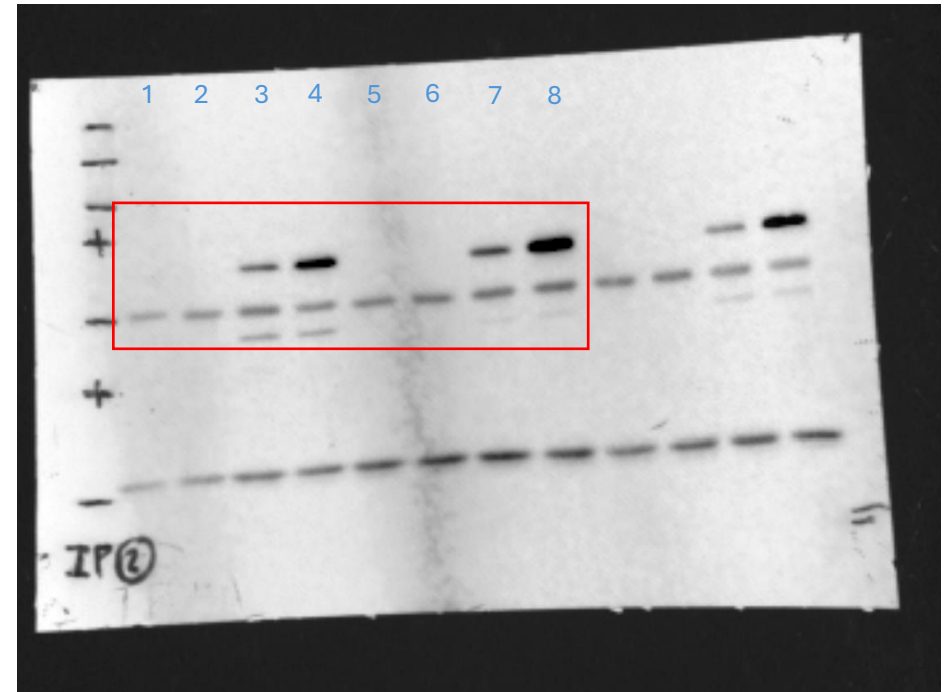

## Anti-ZIKV NS5

### IP anti-HA

- 1- Mock IGF2BP2-HA (-) Rnase A(-)
- 2- Mock IGF2BP2-HA (-) RNase A (+)
- 3- Mock IGF2BP2-HA (+) Rnase A(-)
- 4- Mock IGF2BP2-HA (+) Rnase A(+)
- 5- ZIKV IGF2BP2-HA (-) Rnase A(-)
- 6- ZIKV IGF2BP2-HA (-) RNase A (+)
- 7- ZIKV IGF2BP2-HA (+) Rnase A(-)
- 8- ZIKV IGF2BP2-HA (+) Rnase A(+)

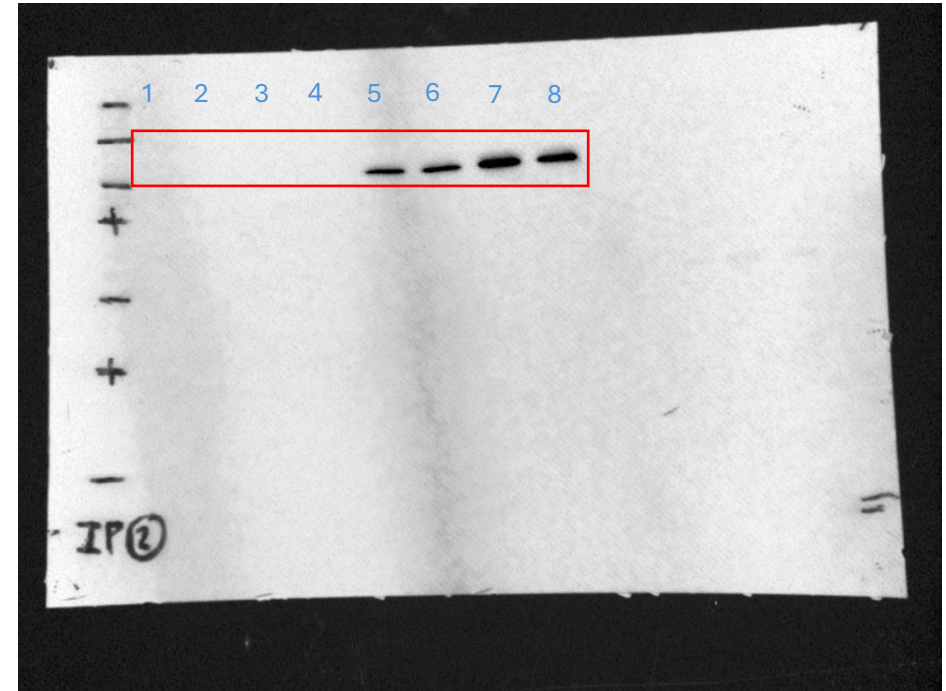

## Anti-ATL2

### IP anti-HA

- 1- Mock IGF2BP2-HA (-) Rnase A(-)
- 2- Mock IGF2BP2-HA (-) RNase A (+)
- 3- Mock IGF2BP2-HA (+) Rnase A(-)
- 4- Mock IGF2BP2-HA (+) Rnase A(+)
- 5- ZIKV IGF2BP2-HA (-) Rnase A(-)
- 6- ZIKV IGF2BP2-HA (-) RNase A (+)
- 7- ZIKV IGF2BP2-HA (+) Rnase A(-)
- 8- ZIKV IGF2BP2-HA (+) Rnase A(+)

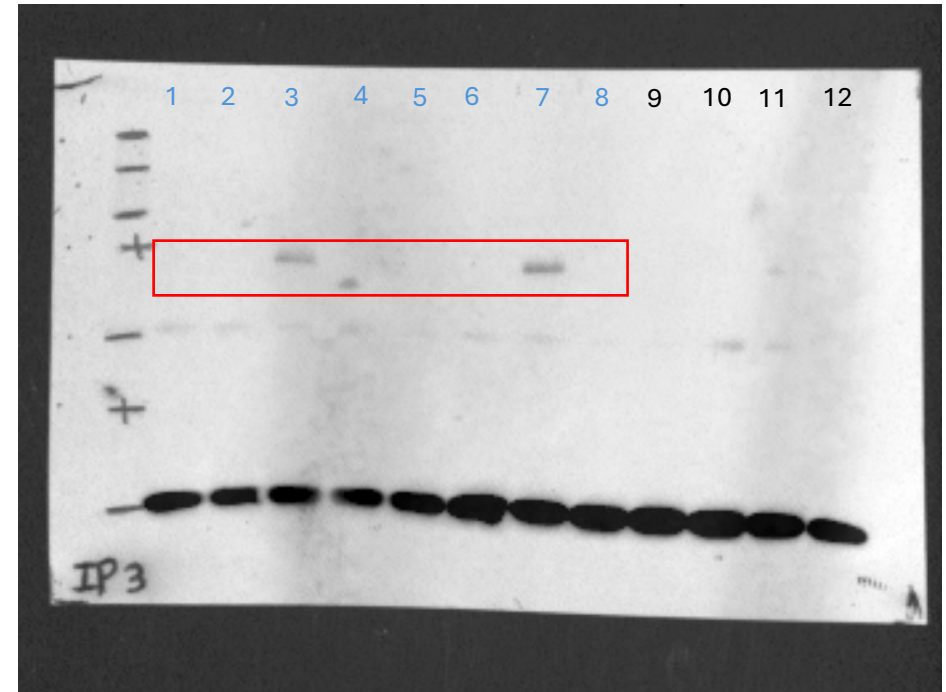

## Anti-IGF2BP1

### IP anti-HA

- 1- Mock IGF2BP2-HA (-) Rnase A(-)
- 2- Mock IGF2BP2-HA (-) RNase A (+)
- 3- Mock IGF2BP2-HA (+) Rnase A(-)
- 4- Mock IGF2BP2-HA (+) Rnase A(+)
- 5- ZIKV IGF2BP2-HA (-) Rnase A(-)
- 6- ZIKV IGF2BP2-HA (-) RNase A (+)
- 7- ZIKV IGF2BP2-HA (+) Rnase A(-)
- 8- ZIKV IGF2BP2-HA (+) Rnase A(+)

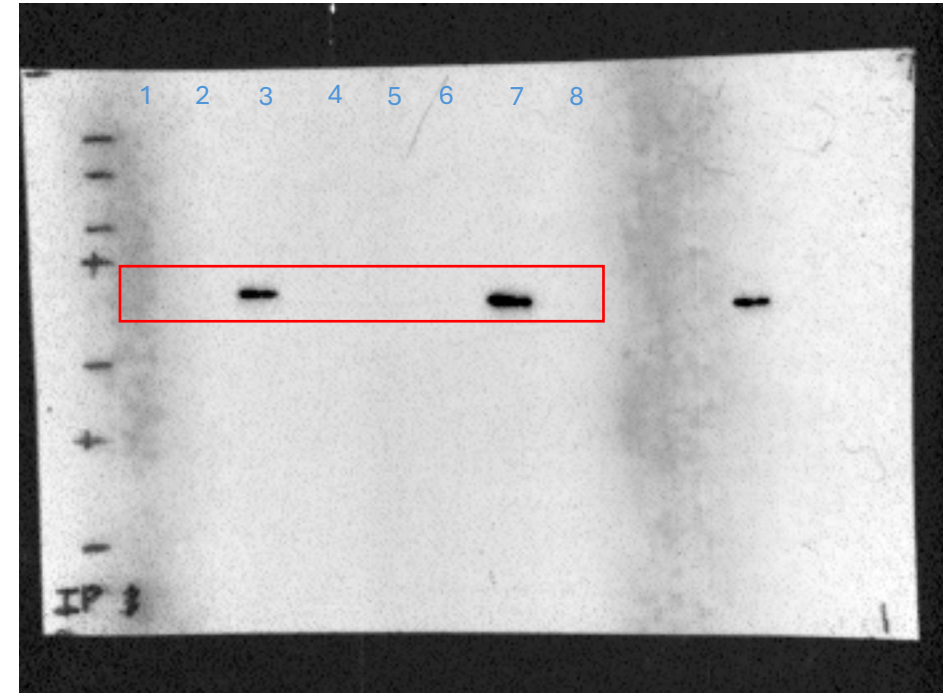

## Anti-IGF2BP3

### IP anti-HA

- 1- Mock IGF2BP2-HA (-) Rnase A(-)
- 2- Mock IGF2BP2-HA (-) RNase A (+)
- 3- Mock IGF2BP2-HA (+) Rnase A(-)
- 4- Mock IGF2BP2-HA (+) Rnase A(+)
- 5- ZIKV IGF2BP2-HA (-) Rnase A(-)
- 6- ZIKV IGF2BP2-HA (-) RNase A (+)
- 7- ZIKV IGF2BP2-HA (+) Rnase A(-)
- 8- ZIKV IGF2BP2-HA (+) Rnase A(+)

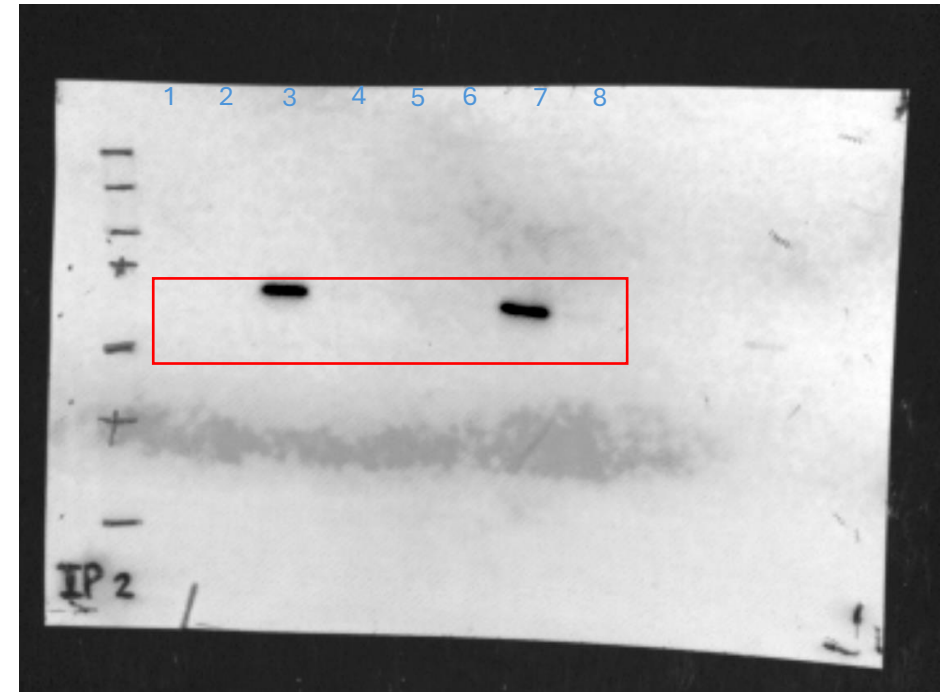

Supplement: fig8-figsupp3-data2 [file elife-94347-fig8-figsupp3-data2-v1.zip]
