# Supplementary material for: Zika virus remodels and hijacks IGF2BP2 ribonucleoprotein complex to promote viral replication organelle biogenesis
Source: eLife journal article supplement (doi:10.7554/elife.94347), 2024-02-19

Figure 9-figure supplement 2A

## Anti-HA

### Cell extracts

- 1- Mock IGF2BP2-HA (-) VCP-HA(-)
- 2- Mock IGF2BP2-HA (+) VCP-HA(-)
- 3- Mock IGF2BP2-HA (-) VCP-HA(+)
- 4- ZIKV IGF2BP2-HA (-) VCP-HA(-)
- 5- ZIKV IGF2BP2-HA (+) VCP-HA(-)
- 6- ZIKV IGF2BP2-HA (-) VCP-HA (+)
- 7- DENV IGF2BP2-HA (-) VCP-HA(-)
- 8- DENV IGF2BP2-HA (+) VCP-HA (-)
- 9- DENV IGF2BP2-HA (-) VCP-HA(+)

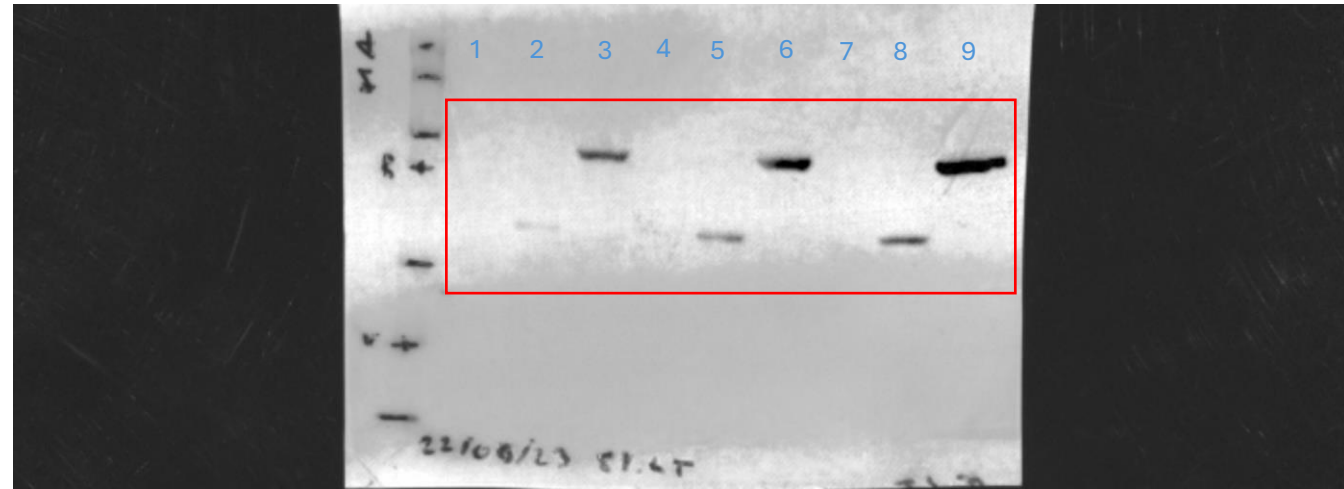

## Anti-VCP

### Cell extracts

- 1- Mock IGF2BP2-HA (-) VCP-HA(-)
- 2- Mock IGF2BP2-HA (+) VCP-HA(-)
- 3- Mock IGF2BP2-HA (-) VCP-HA(+)
- 4- ZIKV IGF2BP2-HA (-) VCP-HA(-)
- 5- ZIKV IGF2BP2-HA (+) VCP-HA(-)
- 6- ZIKV IGF2BP2-HA (-) VCP-HA (+)
- 7- DENV IGF2BP2-HA (-) VCP-HA(-)
- 8- DENV IGF2BP2-HA (+) VCP-HA (-)
- 9- DENV IGF2BP2-HA (-) VCP-HA(+)

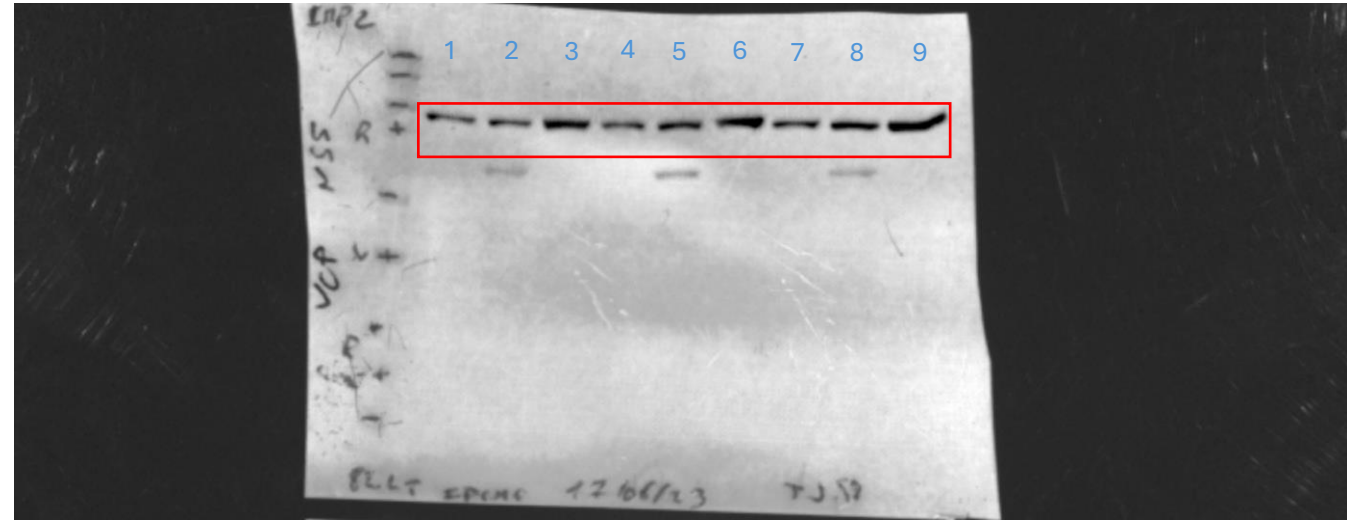

## Anti-IGF2BP2

### Cell extracts

- 1- Mock IGF2BP2-HA (-) VCP-HA(-)
- 2- Mock IGF2BP2-HA (+) VCP-HA(-)
- 3- Mock IGF2BP2-HA (-) VCP-HA(+)
- 4- ZIKV IGF2BP2-HA (-) VCP-HA(-)
- 5- ZIKV IGF2BP2-HA (+) VCP-HA(-)
- 6- ZIKV IGF2BP2-HA (-) VCP-HA (+)
- 7- DENV IGF2BP2-HA (-) VCP-HA(-)
- 8- DENV IGF2BP2-HA (+) VCP-HA (-)
- 9- DENV IGF2BP2-HA (-) VCP-HA(+)

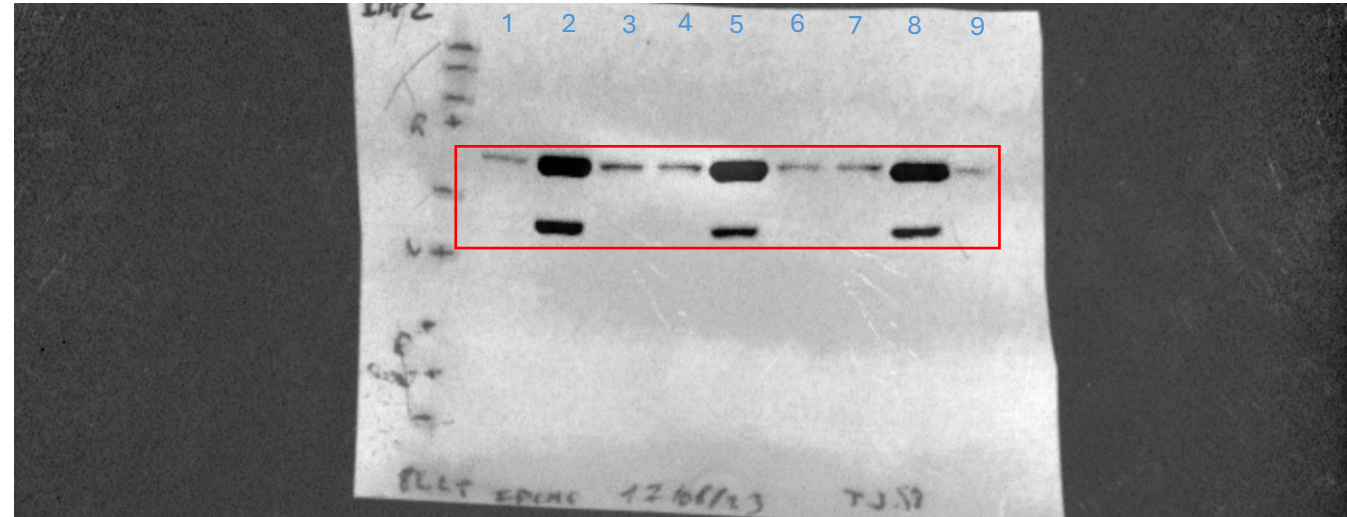

## Anti-NS5

## Cell extracts

- 1- Mock IGF2BP2-HA (-) VCP-HA(-)
- 2- Mock IGF2BP2-HA (+) VCP-HA(-)
- 3- Mock IGF2BP2-HA (-) VCP-HA(+)
- 4- ZIKV IGF2BP2-HA (-) VCP-HA(-)
- 5- ZIKV IGF2BP2-HA (+) VCP-HA(-)
- 6- ZIKV IGF2BP2-HA (-) VCP-HA (+)
- 7- DENV IGF2BP2-HA (-) VCP-HA(-)
- 8- DENV IGF2BP2-HA (+) VCP-HA (-)
- 9- DENV IGF2BP2-HA (-) VCP-HA(+)

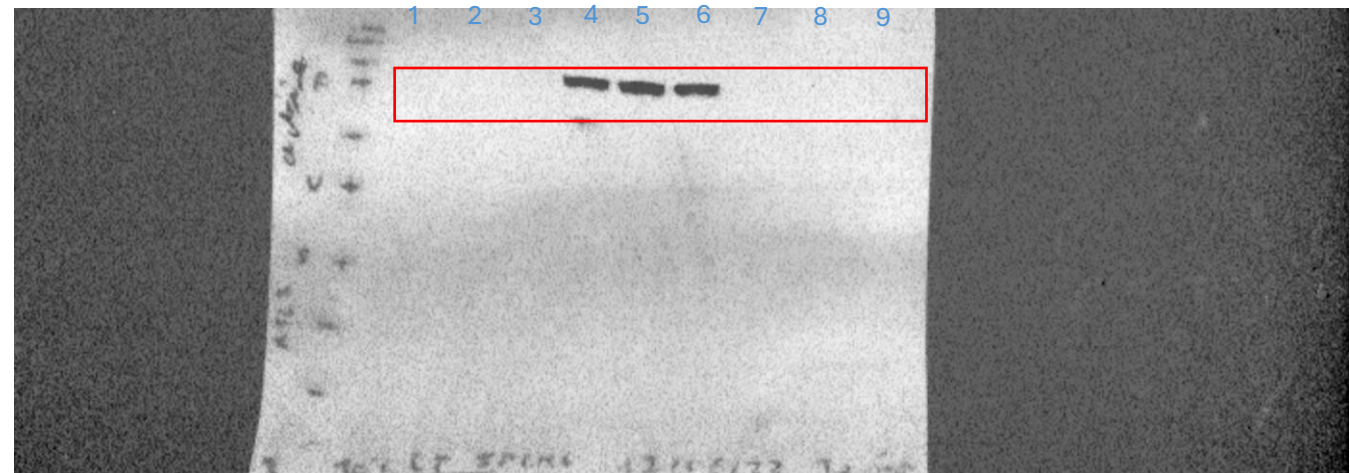

## Anti-ATL2

### Cell extracts

- 1- Mock IGF2BP2-HA (-) VCP-HA(-)
- 2- Mock IGF2BP2-HA (+) VCP-HA(-)
- 3- Mock IGF2BP2-HA (-) VCP-HA(+)
- 4- ZIKV IGF2BP2-HA (-) VCP-HA(-)
- 5- ZIKV IGF2BP2-HA (+) VCP-HA(-)
- 6- ZIKV IGF2BP2-HA (-) VCP-HA (+)
- 7- DENV IGF2BP2-HA (-) VCP-HA(-)
- 8- DENV IGF2BP2-HA (+) VCP-HA (-)
- 9- DENV IGF2BP2-HA (-) VCP-HA(+)

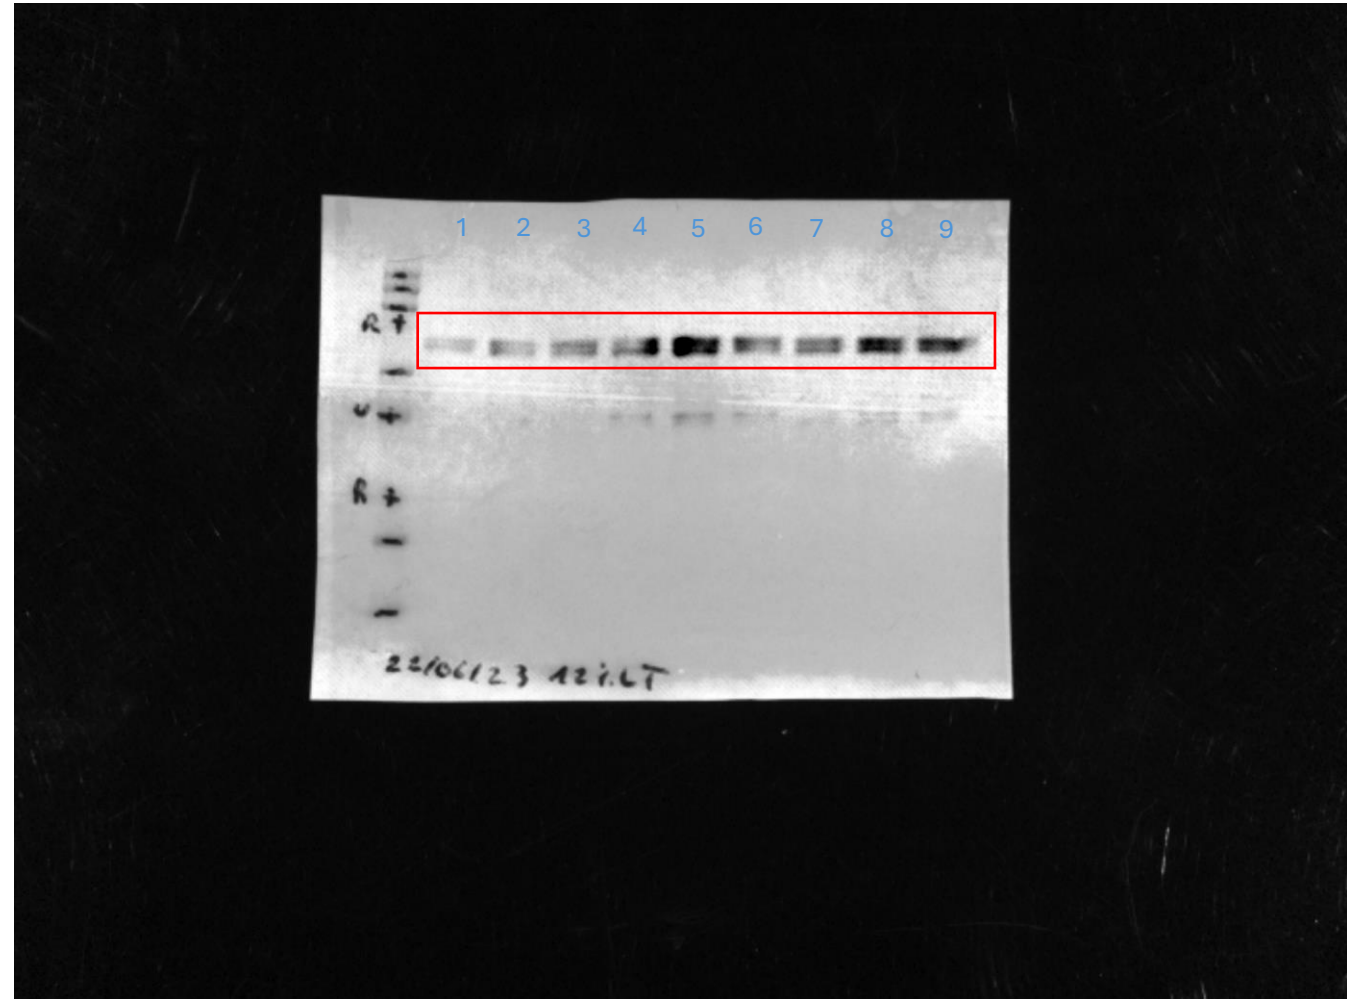

## Anti-IGF2BP1

### Cell extracts

- 1- Mock IGF2BP2-HA (-) VCP-HA(-)
- 2- Mock IGF2BP2-HA (+) VCP-HA(-)
- 3- Mock IGF2BP2-HA (-) VCP-HA(+)
- 4- ZIKV IGF2BP2-HA (-) VCP-HA(-)
- 5- ZIKV IGF2BP2-HA (+) VCP-HA(-)
- 6- ZIKV IGF2BP2-HA (-) VCP-HA (+)
- 7- DENV IGF2BP2-HA (-) VCP-HA(-)
- 8- DENV IGF2BP2-HA (+) VCP-HA (-)
- 9- DENV IGF2BP2-HA (-) VCP-HA(+)

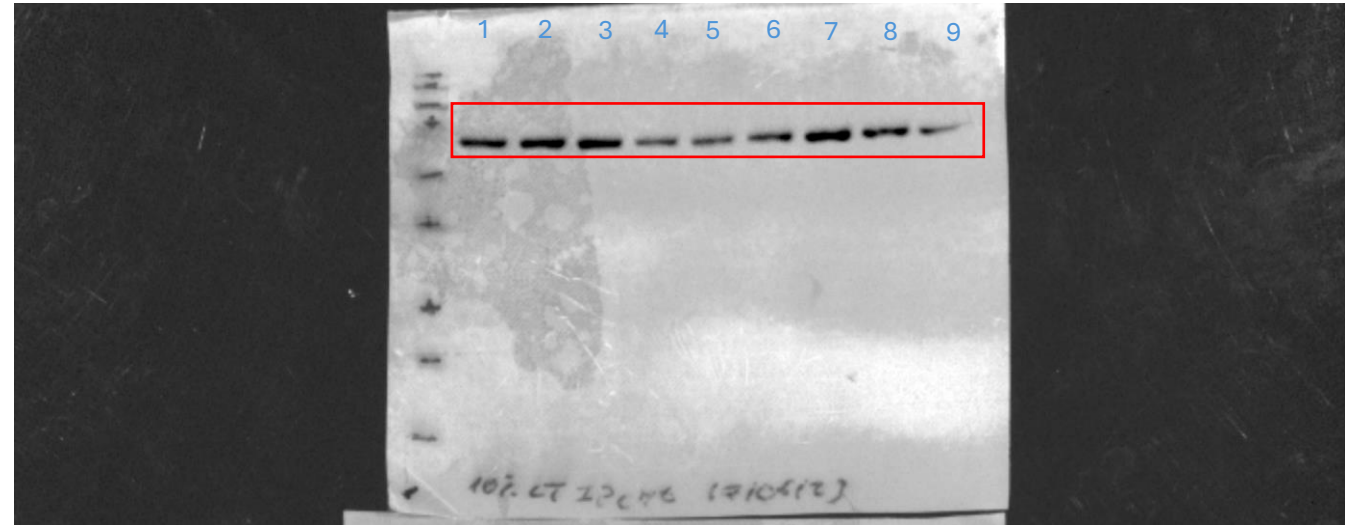

## Anti-IGF2BP3

### Cell extracts

- 1- Mock IGF2BP2-HA (-) VCP-HA(-)
- 2- Mock IGF2BP2-HA (+) VCP-HA(-)
- 3- Mock IGF2BP2-HA (-) VCP-HA(+)
- 4- ZIKV IGF2BP2-HA (-) VCP-HA(-)
- 5- ZIKV IGF2BP2-HA (+) VCP-HA(-)
- 6- ZIKV IGF2BP2-HA (-) VCP-HA (+)
- 7- DENV IGF2BP2-HA (-) VCP-HA(-)
- 8- DENV IGF2BP2-HA (+) VCP-HA (-)
- 9- DENV IGF2BP2-HA (-) VCP-HA(+)

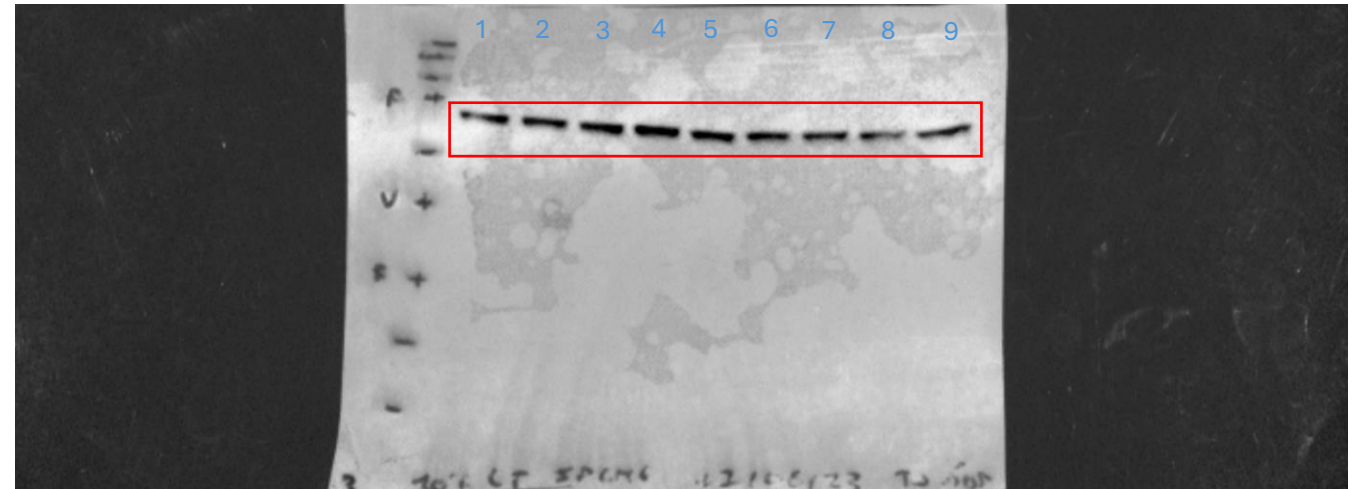



## Anti-YBX1

### Cell extracts

- 1- Mock IGF2BP2-HA (-) VCP-HA(-)
- 2- Mock IGF2BP2-HA (+) VCP-HA(-)
- 3- Mock IGF2BP2-HA (-) VCP-HA(+)
- 4- ZIKV IGF2BP2-HA (-) VCP-HA(-)
- 5- ZIKV IGF2BP2-HA (+) VCP-HA(-)
- 6- ZIKV IGF2BP2-HA (-) VCP-HA (+)
- 7- DENV IGF2BP2-HA (-) VCP-HA(-)
- 8- DENV IGF2BP2-HA (+) VCP-HA (-)
- 9- DENV IGF2BP2-HA (-) VCP-HA(+)

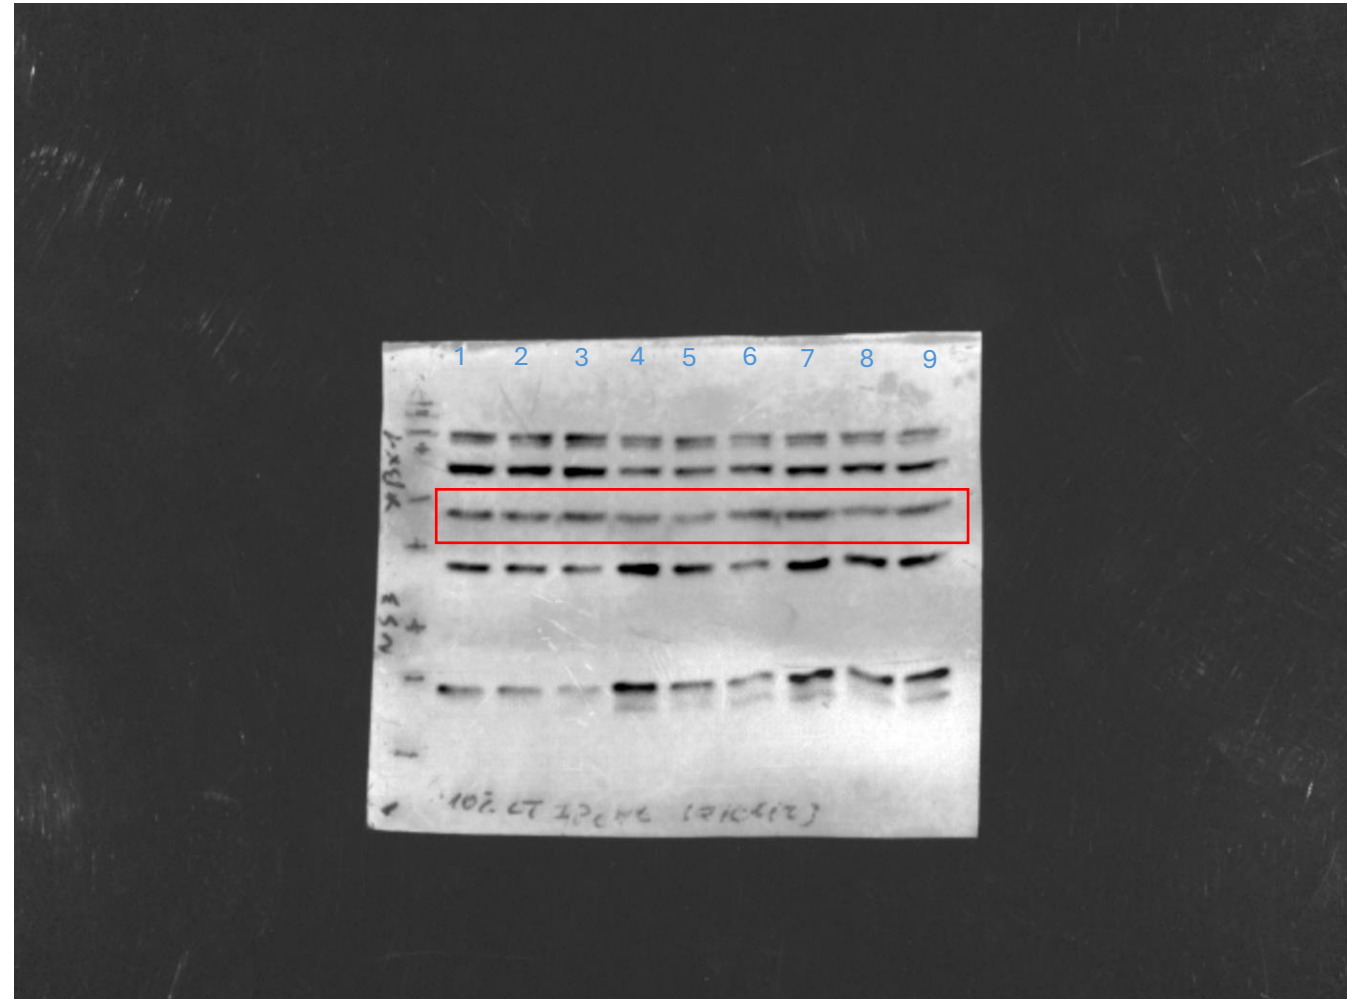

## Anti-actin

### Cell extracts

- 1- Mock IGF2BP2-HA (-) VCP-HA(-)
- 2- Mock IGF2BP2-HA (+) VCP-HA(-)
- 3- Mock IGF2BP2-HA (-) VCP-HA(+)
- 4- ZIKV IGF2BP2-HA (-) VCP-HA(-)
- 5- ZIKV IGF2BP2-HA (+) VCP-HA(-)
- 6- ZIKV IGF2BP2-HA (-) VCP-HA (+)
- 7- DENV IGF2BP2-HA (-) VCP-HA(-)
- 8- DENV IGF2BP2-HA (+) VCP-HA (-)
- 9- DENV IGF2BP2-HA (-) VCP-HA(+)

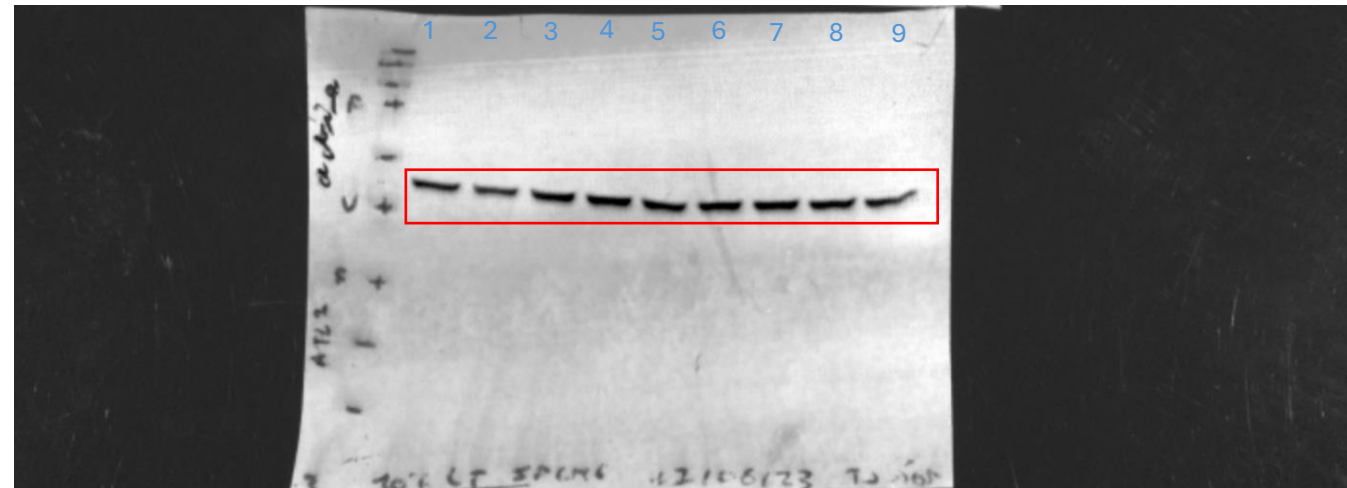

## Anti-HA

### IP anti-HA

- 1- Mock IGF2BP2-HA (-) VCP-HA(-)
- 2- Mock IGF2BP2-HA (+) VCP-HA(-)
- 3- Mock IGF2BP2-HA (-) VCP-HA(+)
- 4- ZIKV IGF2BP2-HA (-) VCP-HA(-)
- 5- ZIKV IGF2BP2-HA (+) VCP-HA(-)
- 6- ZIKV IGF2BP2-HA (-) VCP-HA (+)
- 7- DENV IGF2BP2-HA (-) VCP-HA(-)
- 8- DENV IGF2BP2-HA (+) VCP-HA (-)
- 9- DENV IGF2BP2-HA (-) VCP-HA(+)

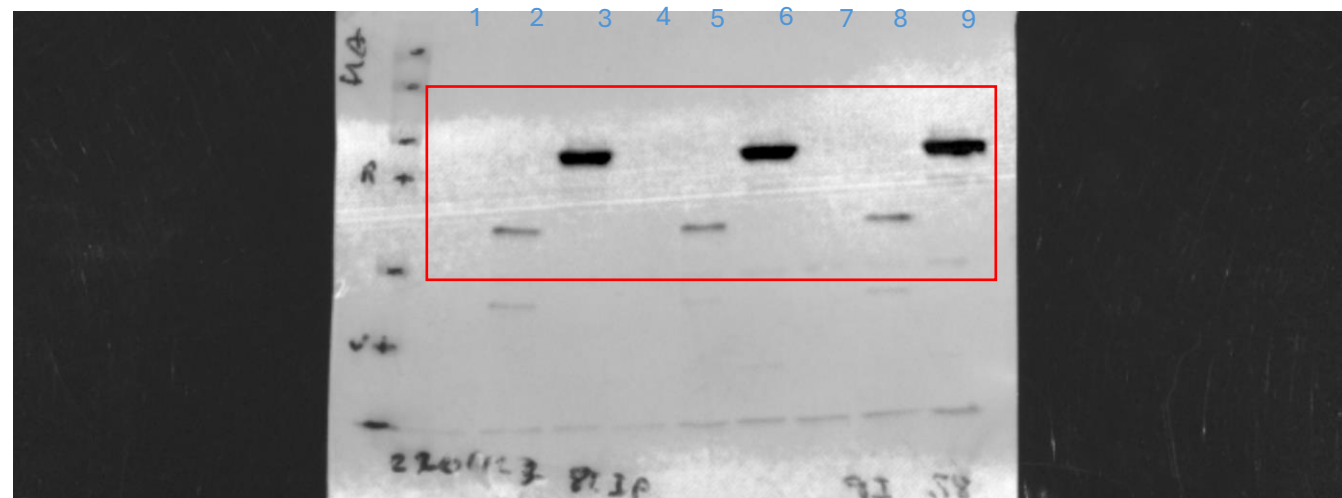

## Anti-VCP

### IP anti-HA

- 1- Mock IGF2BP2-HA (-) VCP-HA(-)
- 2- Mock IGF2BP2-HA (+) VCP-HA(-)
- 3- Mock IGF2BP2-HA (-) VCP-HA(+)
- 4- ZIKV IGF2BP2-HA (-) VCP-HA(-)
- 5- ZIKV IGF2BP2-HA (+) VCP-HA(-)
- 6- ZIKV IGF2BP2-HA (-) VCP-HA (+)
- 7- DENV IGF2BP2-HA (-) VCP-HA(-)
- 8- DENV IGF2BP2-HA (+) VCP-HA (-)
- 9- DENV IGF2BP2-HA (-) VCP-HA(+)

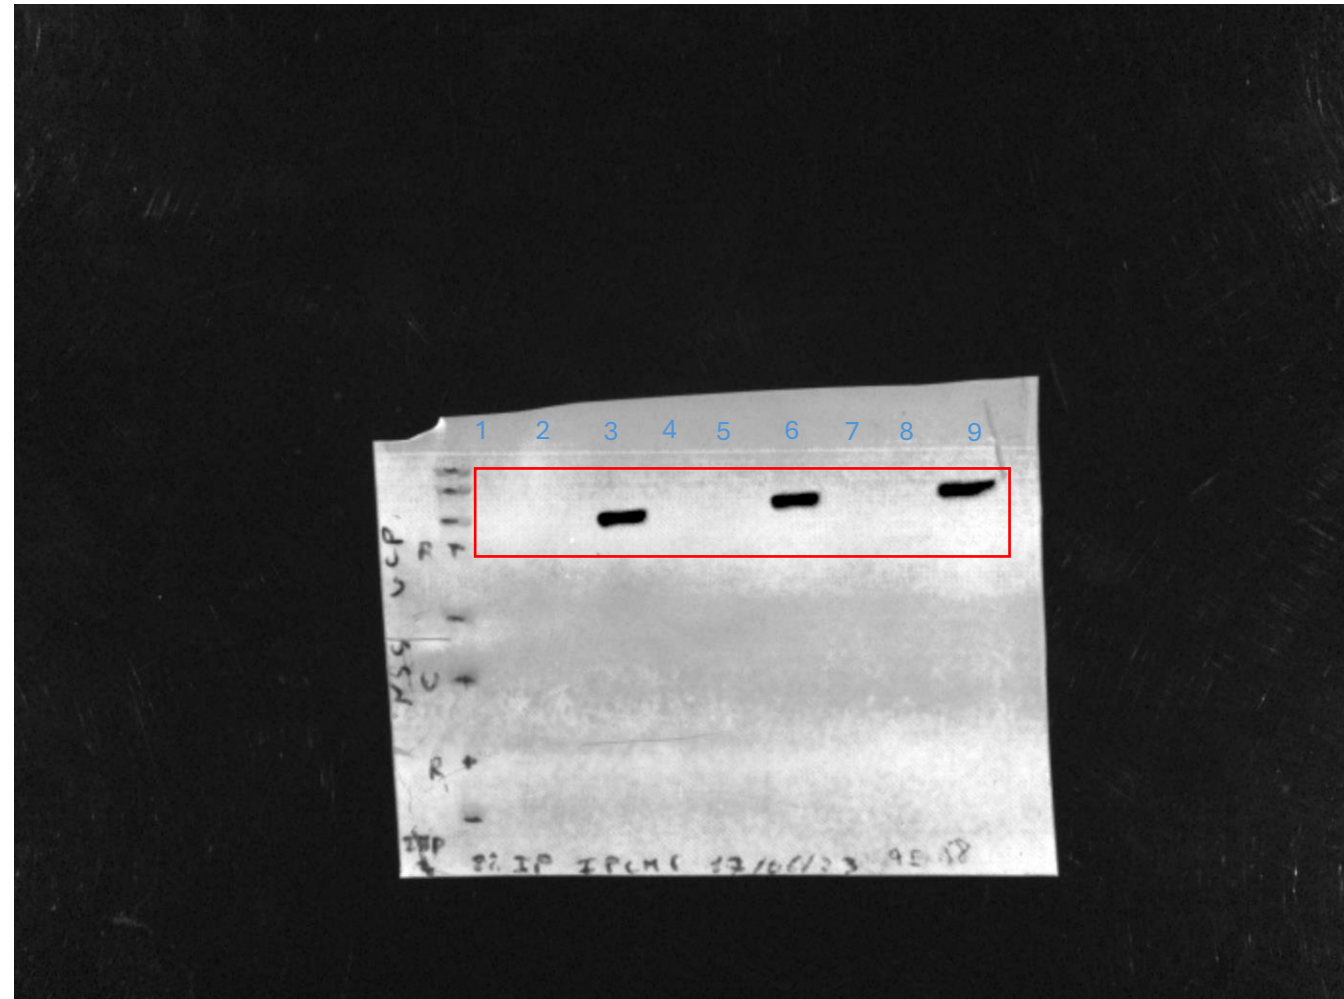

## Anti-IGF2BP2

### IP anti-HA

- 1- Mock IGF2BP2-HA (-) VCP-HA(-)
- 2- Mock IGF2BP2-HA (+) VCP-HA(-)
- 3- Mock IGF2BP2-HA (-) VCP-HA(+)
- 4- ZIKV IGF2BP2-HA (-) VCP-HA(-)
- 5- ZIKV IGF2BP2-HA (+) VCP-HA(-)
- 6- ZIKV IGF2BP2-HA (-) VCP-HA (+)
- 7- DENV IGF2BP2-HA (-) VCP-HA(-)
- 8- DENV IGF2BP2-HA (+) VCP-HA (-)
- 9- DENV IGF2BP2-HA (-) VCP-HA(+)

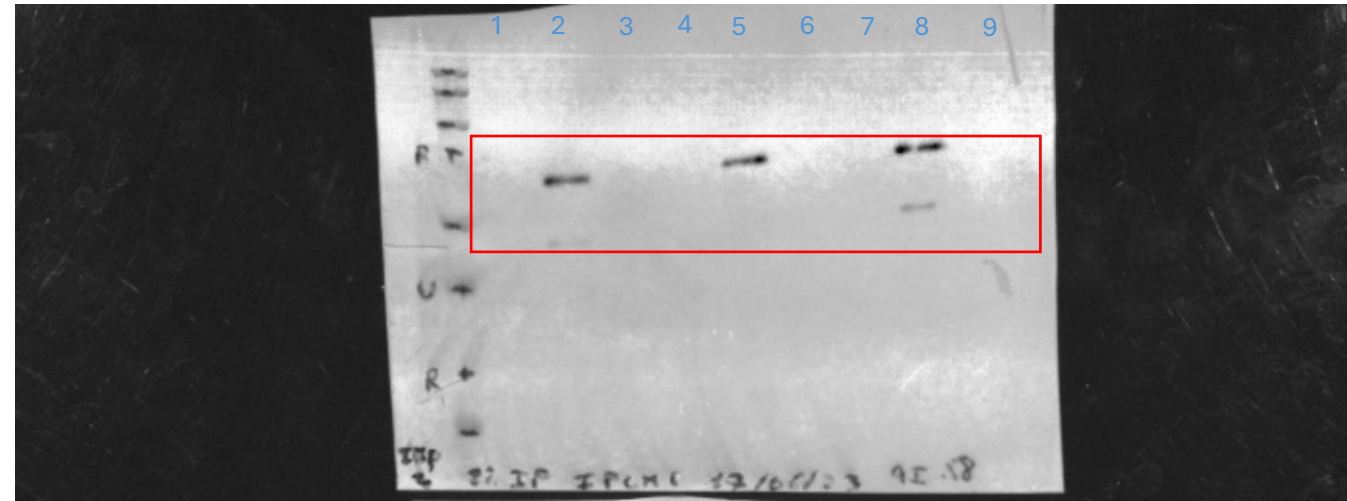

## Anti-NS5

### IP anti-HA

- 1- Mock IGF2BP2-HA (-) VCP-HA(-)
- 2- Mock IGF2BP2-HA (+) VCP-HA(-)
- 3- Mock IGF2BP2-HA (-) VCP-HA(+)
- 4- ZIKV IGF2BP2-HA (-) VCP-HA(-)
- 5- ZIKV IGF2BP2-HA (+) VCP-HA(-)
- 6- ZIKV IGF2BP2-HA (-) VCP-HA (+)
- 7- DENV IGF2BP2-HA (-) VCP-HA(-)
- 8- DENV IGF2BP2-HA (+) VCP-HA (-)
- 9- DENV IGF2BP2-HA (-) VCP-HA(+)

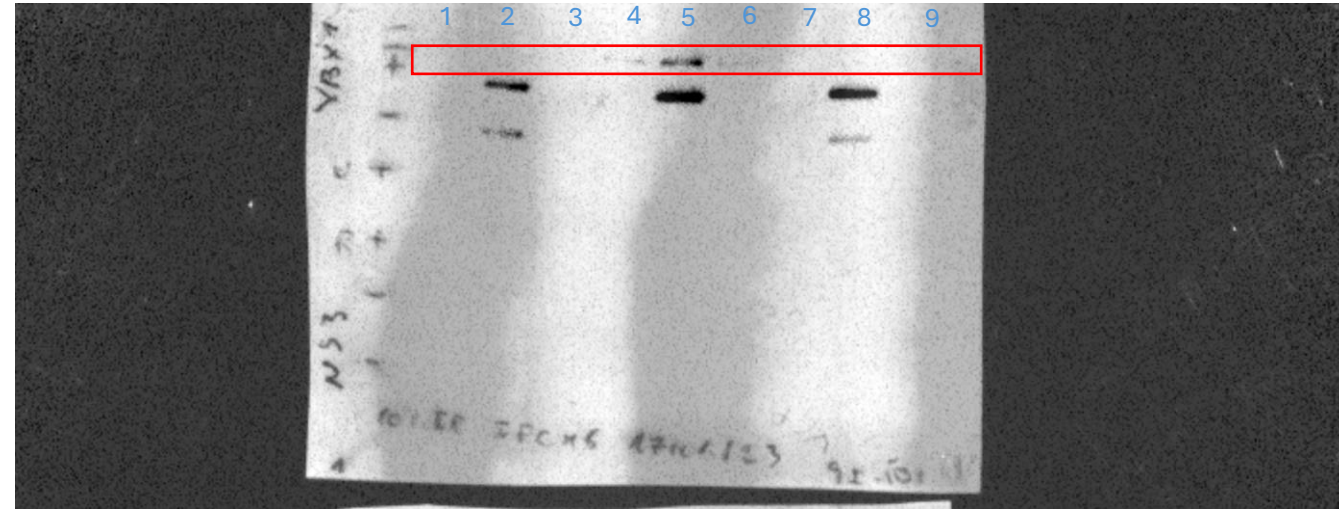



## Anti-ATL2

IP anti-HA

- 1- Mock IGF2BP2-HA (-) VCP-HA(-)
- 2- Mock IGF2BP2-HA (+) VCP-HA(-)
- 3- Mock IGF2BP2-HA (-) VCP-HA(+)
- 4- ZIKV IGF2BP2-HA (-) VCP-HA(-)
- 5- ZIKV IGF2BP2-HA (+) VCP-HA(-)
- 6- ZIKV IGF2BP2-HA (-) VCP-HA (+)
- 7- DENV IGF2BP2-HA (-) VCP-HA(-)
- 8- DENV IGF2BP2-HA (+) VCP-HA (-)
- 9- DENV IGF2BP2-HA (-) VCP-HA(+)

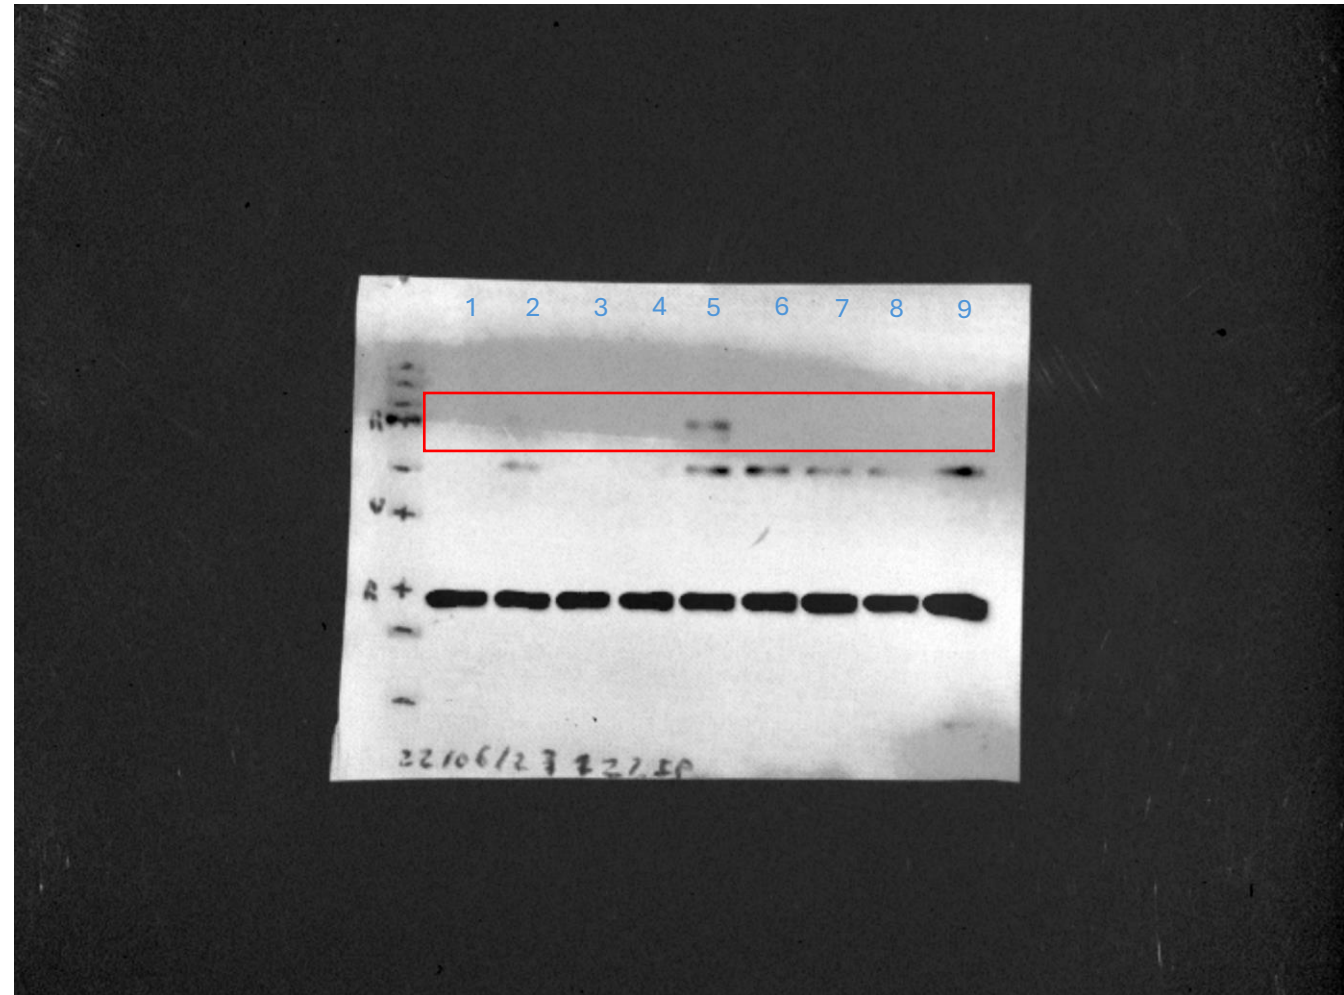

## Anti-IGF2BP1

### IP anti-HA

- 1- Mock IGF2BP2-HA (-) VCP-HA(-)
- 2- Mock IGF2BP2-HA (+) VCP-HA(-)
- 3- Mock IGF2BP2-HA (-) VCP-HA(+)
- 4- ZIKV IGF2BP2-HA (-) VCP-HA(-)
- 5- ZIKV IGF2BP2-HA (+) VCP-HA(-)
- 6- ZIKV IGF2BP2-HA (-) VCP-HA (+)
- 7- DENV IGF2BP2-HA (-) VCP-HA(-)
- 8- DENV IGF2BP2-HA (+) VCP-HA (-)
- 9- DENV IGF2BP2-HA (-) VCP-HA(+)

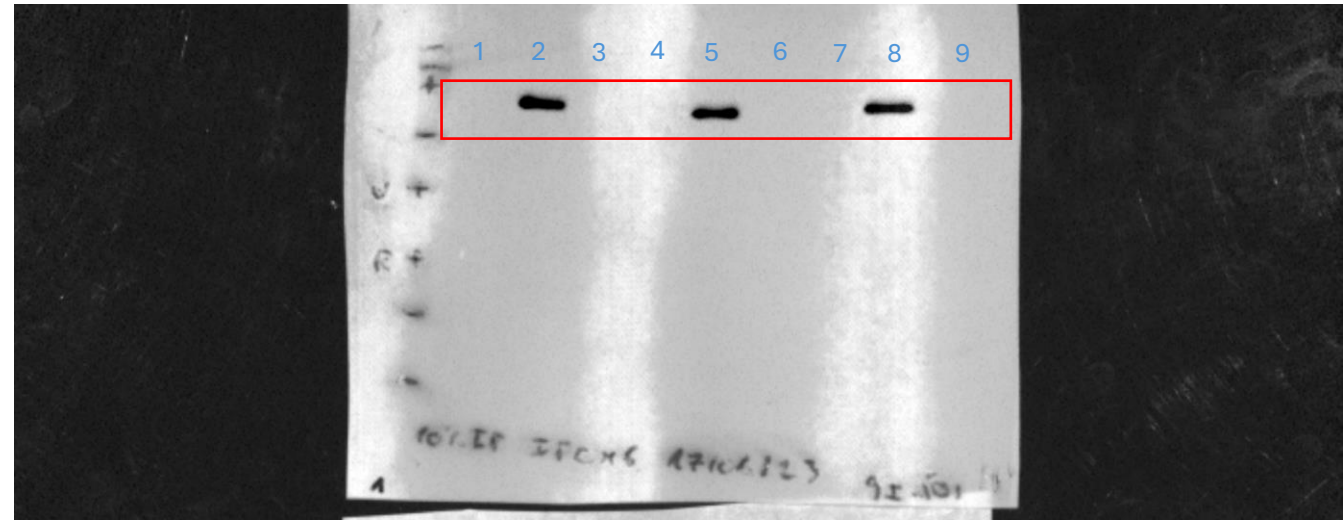



## Anti-IGF2BP3

### IP anti-HA

- 1- Mock IGF2BP2-HA (-) VCP-HA(-)
- 2- Mock IGF2BP2-HA (+) VCP-HA(-)
- 3- Mock IGF2BP2-HA (-) VCP-HA(+)
- 4- ZIKV IGF2BP2-HA (-) VCP-HA(-)
- 5- ZIKV IGF2BP2-HA (+) VCP-HA(-)
- 6- ZIKV IGF2BP2-HA (-) VCP-HA (+)
- 7- DENV IGF2BP2-HA (-) VCP-HA(-)
- 8- DENV IGF2BP2-HA (+) VCP-HA (-)
- 9- DENV IGF2BP2-HA (-) VCP-HA(+)

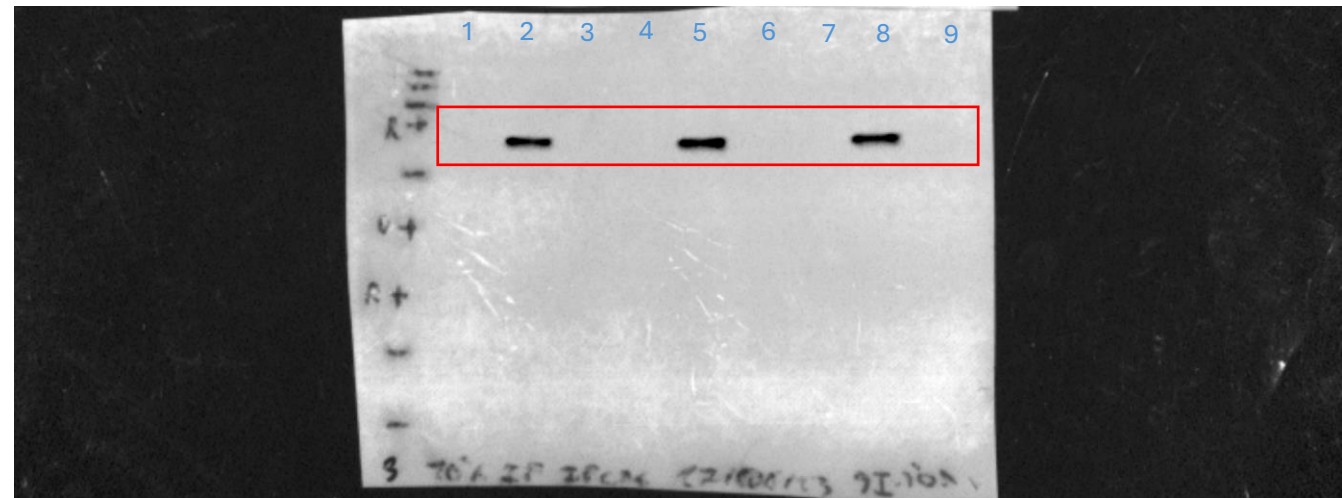

## Anti-YBX1

### IP anti-HA

- 1- Mock IGF2BP2-HA (-) VCP-HA(-)
- 2- Mock IGF2BP2-HA (+) VCP-HA(-)
- 3- Mock IGF2BP2-HA (-) VCP-HA(+)
- 4- ZIKV IGF2BP2-HA (-) VCP-HA(-)
- 5- ZIKV IGF2BP2-HA (+) VCP-HA(-)
- 6- ZIKV IGF2BP2-HA (-) VCP-HA (+)
- 7- DENV IGF2BP2-HA (-) VCP-HA(-)
- 8- DENV IGF2BP2-HA (+) VCP-HA (-)
- 9- DENV IGF2BP2-HA (-) VCP-HA(+)

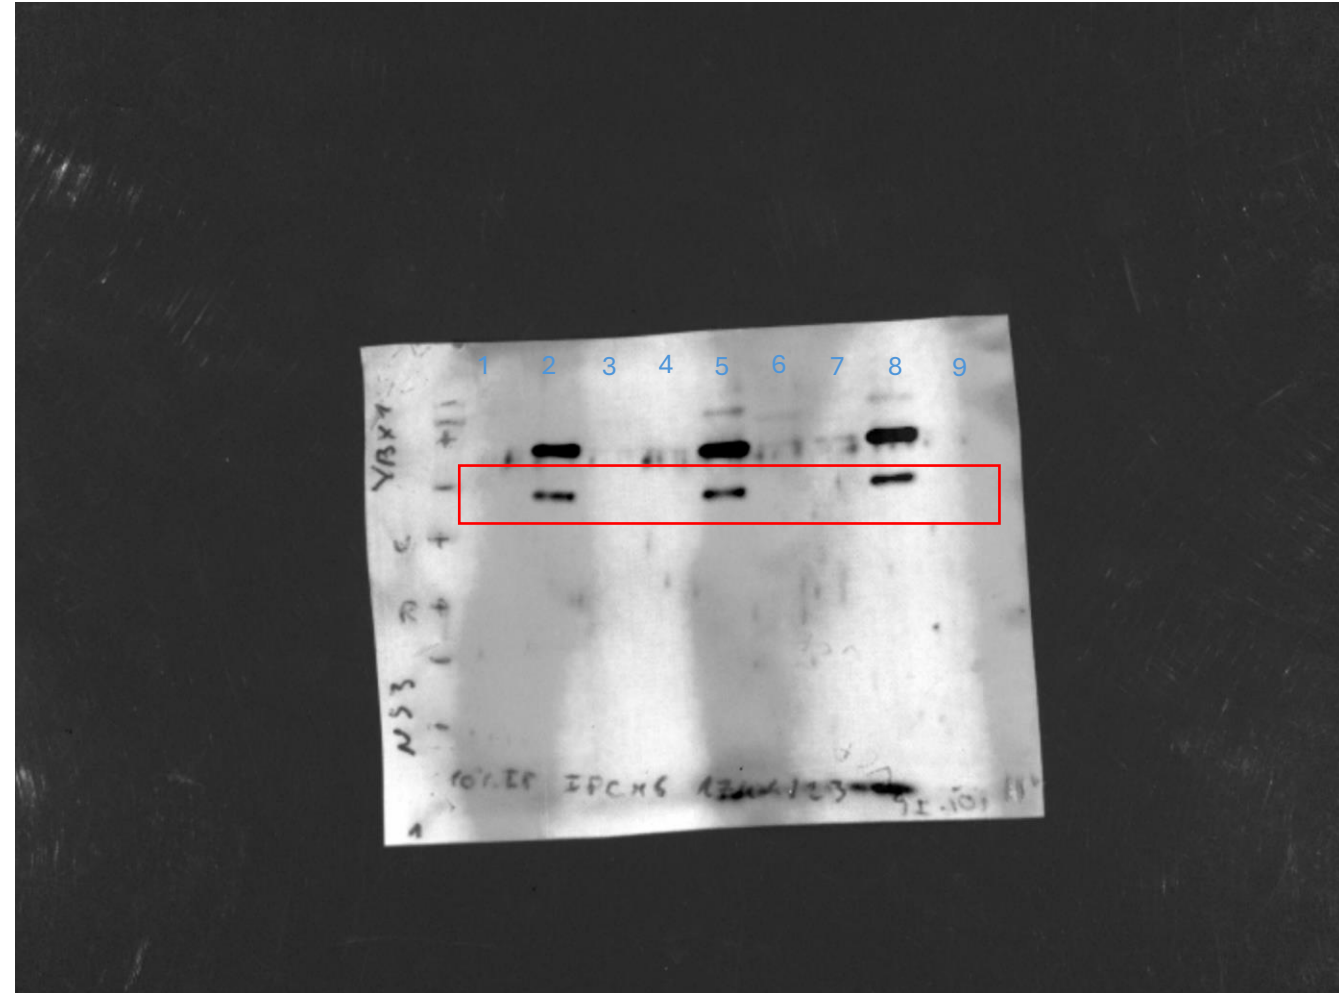

Supplement: fig9-figsupp2-data2 [file elife-94347-fig9-figsupp2-data2-v1.zip]
