# Supplementary material for: Zika virus remodels and hijacks IGF2BP2 ribonucleoprotein complex to promote viral replication organelle biogenesis
Source: eLife journal article supplement (doi:10.7554/elife.94347), 2024-02-19

Figure 2A

## Anti-IGF2BP2

- 1- Mock shNT
- 2- Mock shIGF2BP2
- 3- ZIKV shNT
- 4- ZIKV shIGF2BP2

1 2 3 4

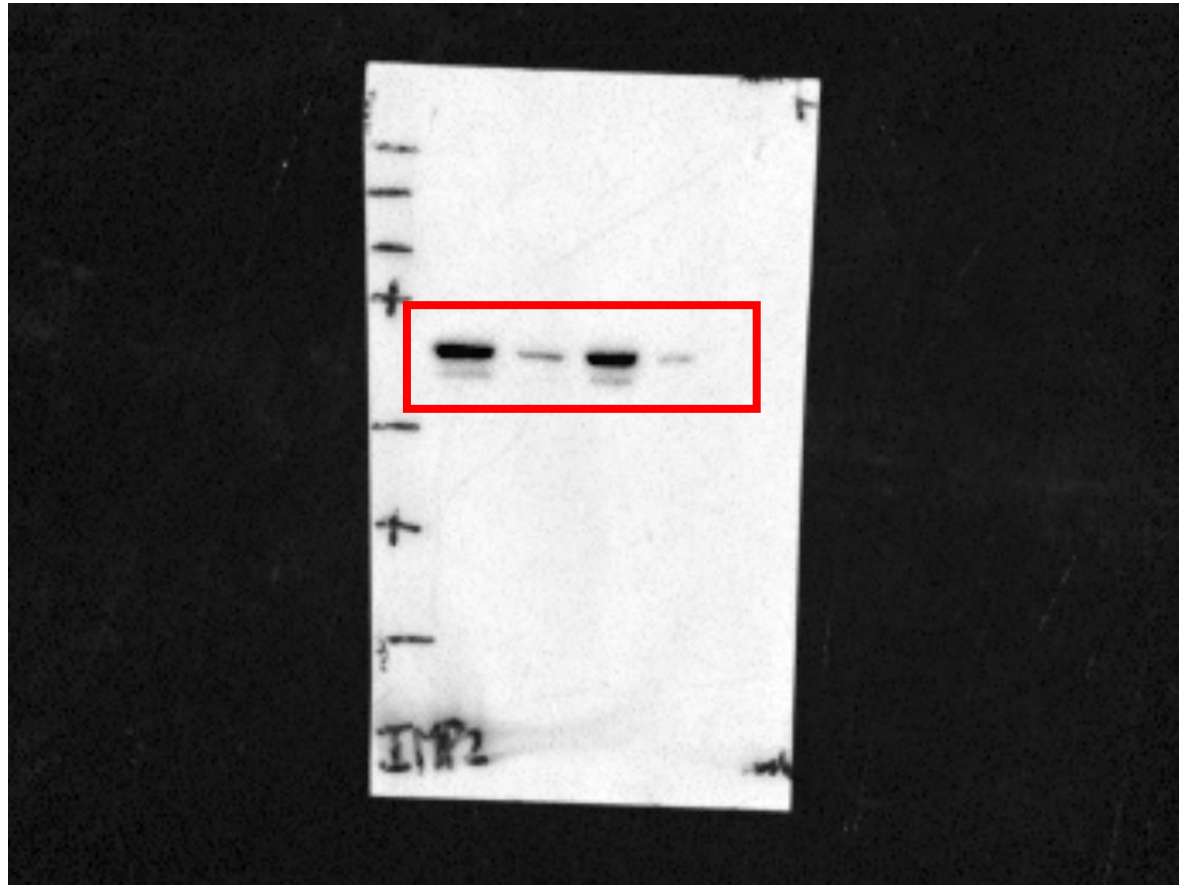

## Anti-NS3

- 1- Mock shNT
- 2- Mock shIGF2BP2
- 3- ZIKV shNT
- 4- ZIKV shIGF2BP2

1 2 3 4

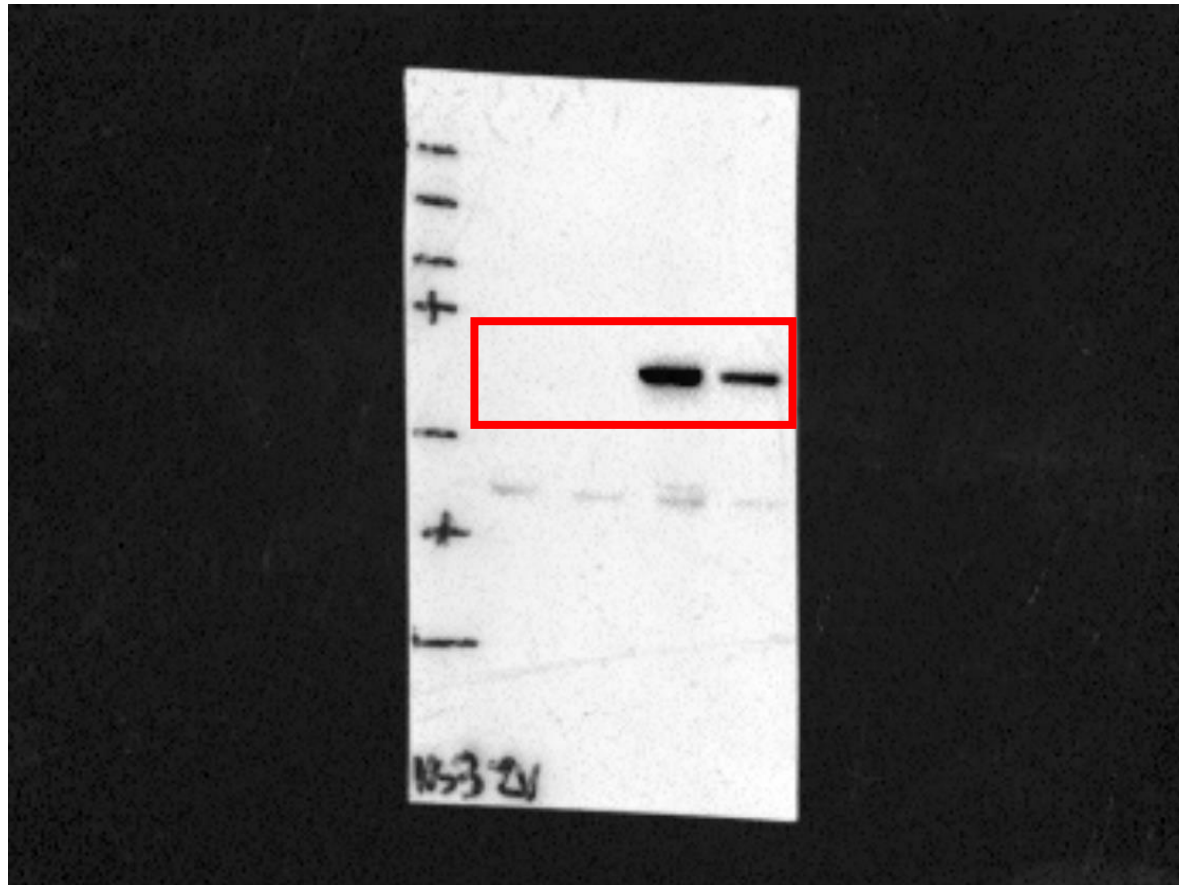

## Anti-NS4A ZIKV

- 1- Mock shNT
- 2- Mock shIGF2BP2
- 3- ZIKV shNT
- 4- ZIKV shIGF2BP2

1 2 3 4

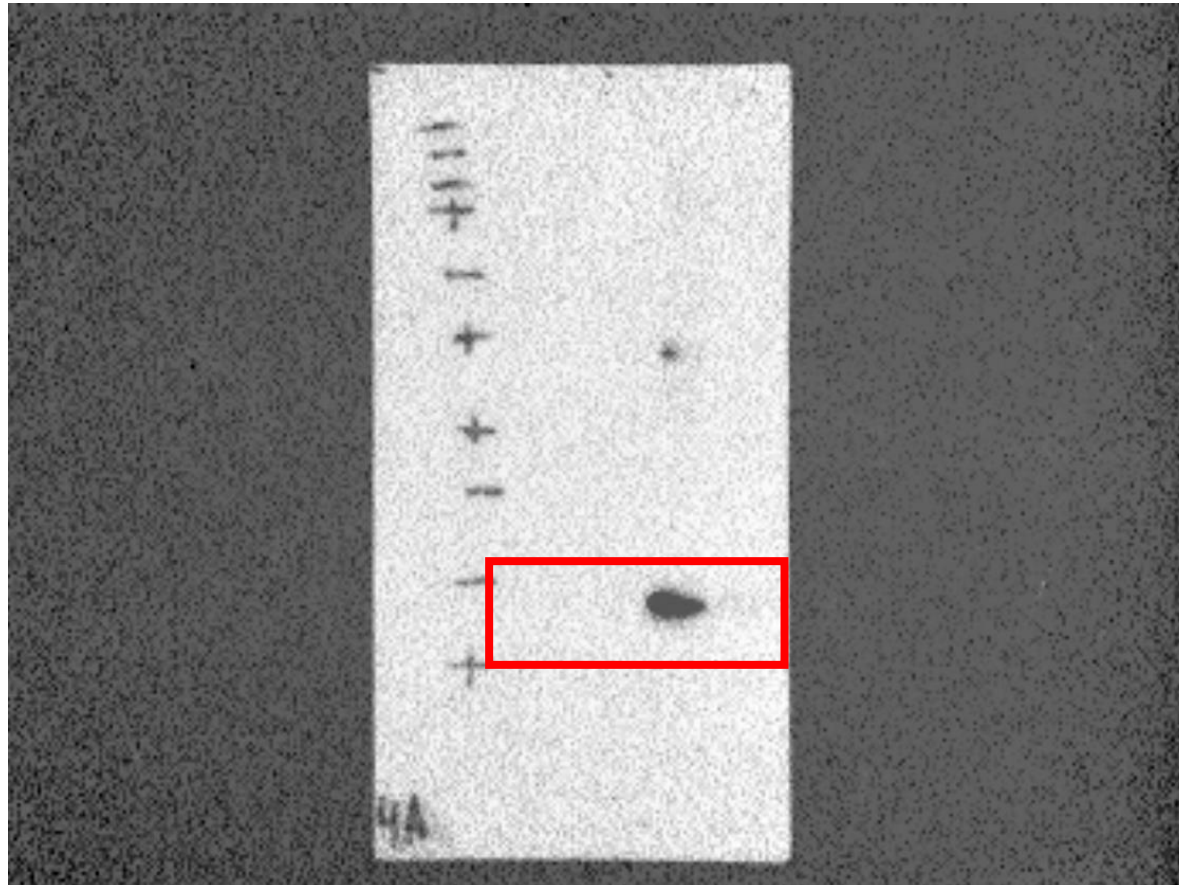

## Anti-NS5 ZIKV

- 1- Mock shNT
- 2- Mock shIGF2BP2
- 3- ZIKV shNT
- 4- ZIKV shIGF2BP2

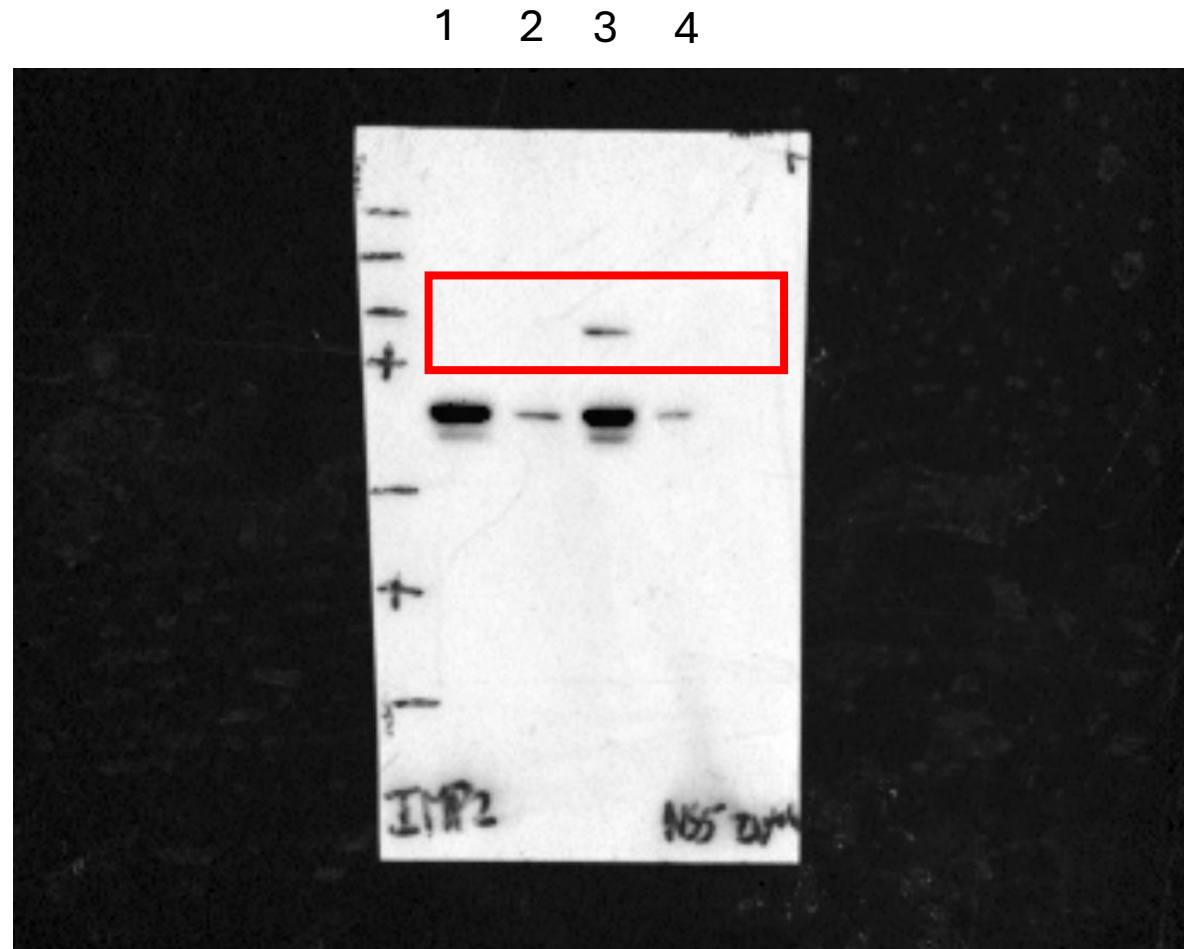

## Anti-actin

- 1- Mock shNT
- 2- Mock shIGF2BP2
- 3- ZIKV shNT
- 4- ZIKV shIGF2BP2

1 2 3 4

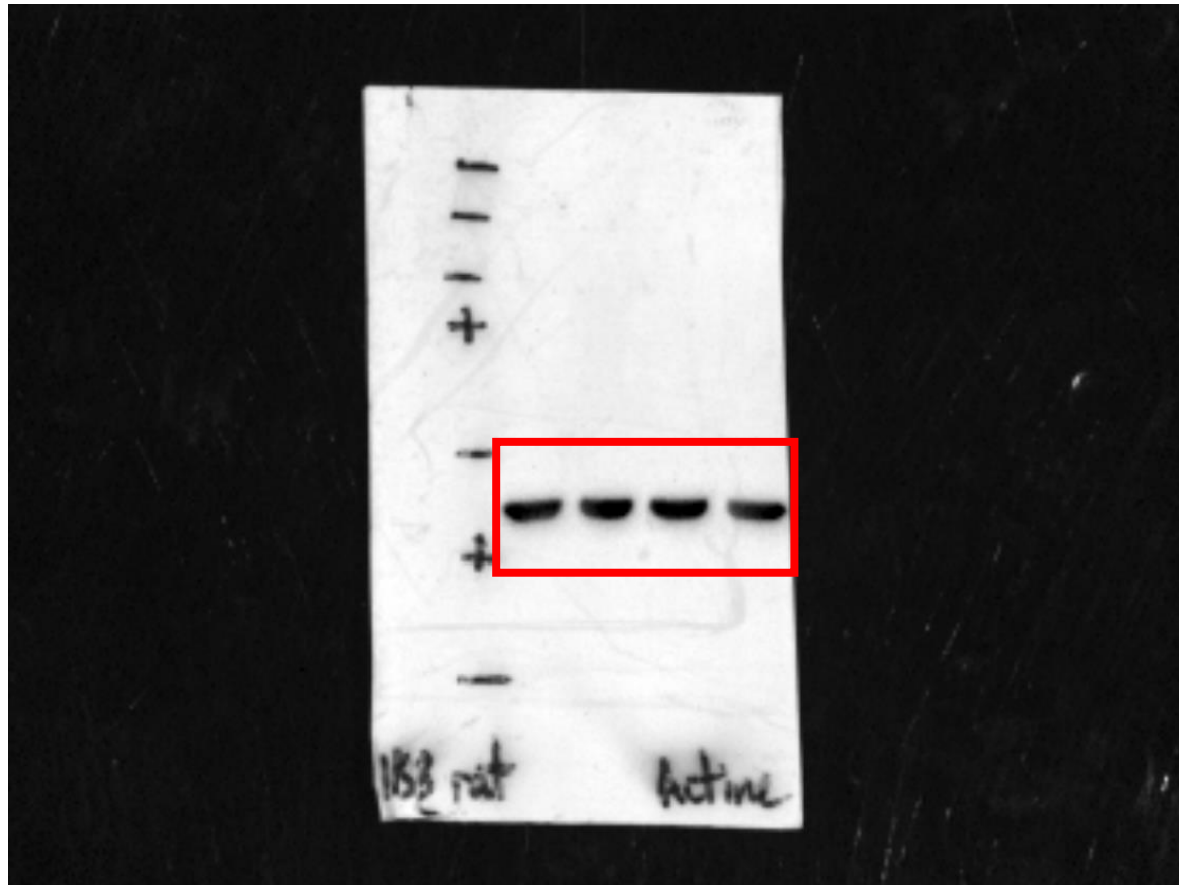

Figure 2D

## Anti-IGF2BP2

3- NHA-hTERT shNT

4- NHA-hTERT shIGF2BP2

3 4

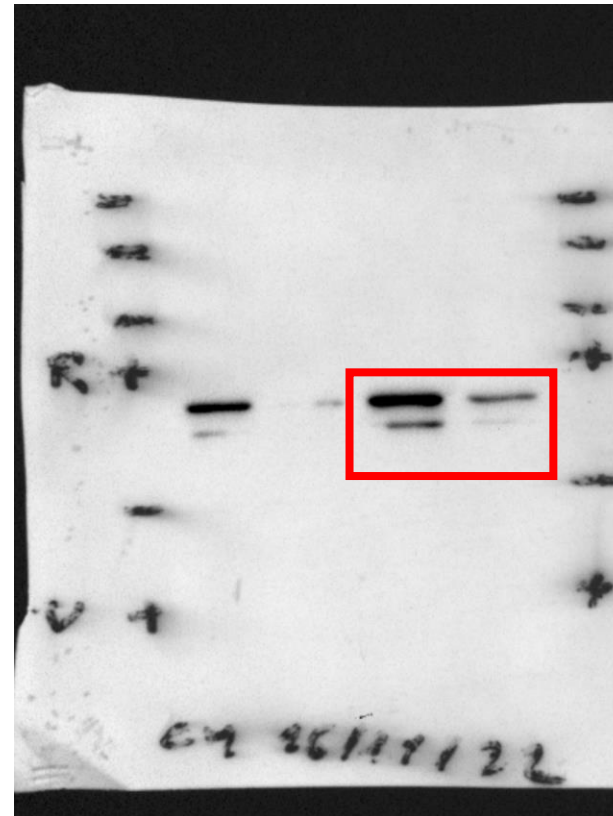

## Anti-actin

3- NHA-hTERT shNT

4- NHA-hTERT shIGF2BP2

3 4

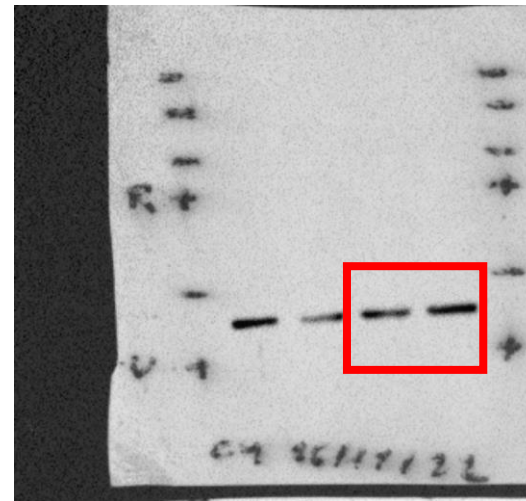

Figure 2E

## Anti-IGF2BP2

1- JEG-3 shNT

2- JEG-3 shIGF2BP2

1 2

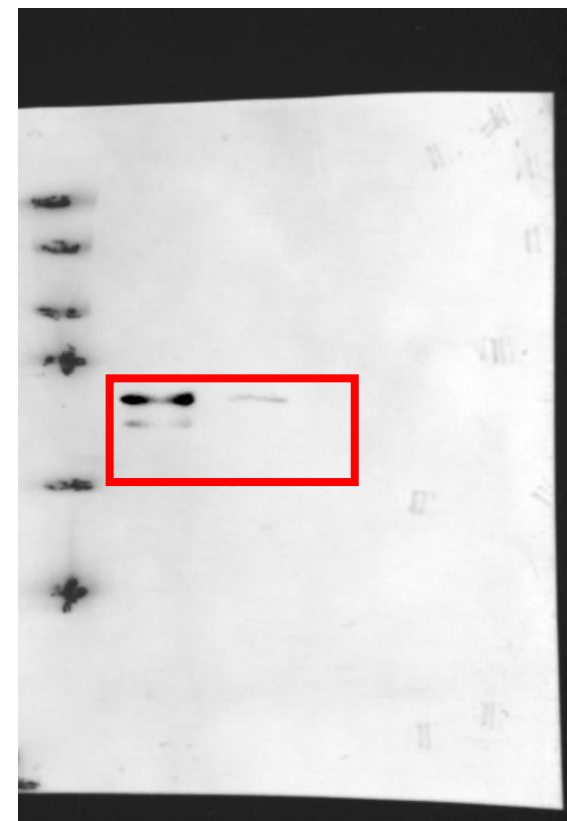

## Anti-Actin

1- JEG-3 shNT

2- JEG-3 shIGF2BP2

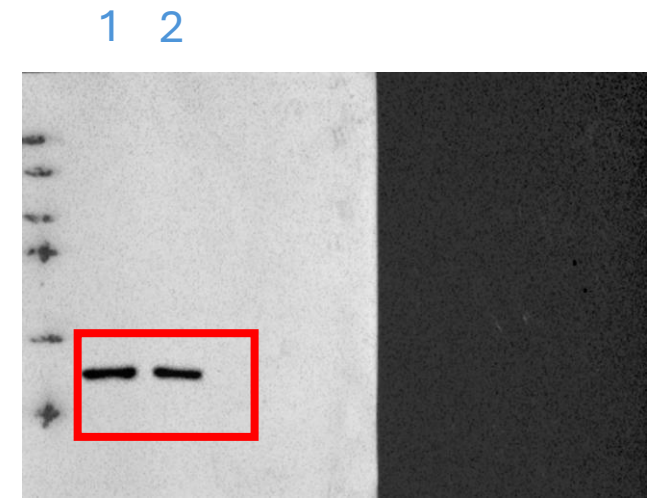

Supplement: fig2-data2 [file elife-94347-fig2-data2-v1.zip]
