# Supplementary material for: Zika virus remodels and hijacks IGF2BP2 ribonucleoprotein complex to promote viral replication organelle biogenesis
Source: eLife. 2024 Nov 20;13:RP94347. doi: 10.7554/eLife.94347 (PMC11578589; doi:10.7554/eLife.94347)
Supplement: Figure 1—source data 1. [file elife-94347-fig1-data1.xlsx]

## Sheet: Fig.1 
figure 1A	fold
Cell viability	N1	N2	N3	N4	N5	mean (%)	SEM
shNT	1	1	1	1	1	1	0
shRHA	0.68736	1.15158	0.770493	0.509827	0.573623	0.738	0.1125
shYBX1	0.801467	1.48923	1.17878	0.643984	0.82661	0.9888	0.1529
shDDX6	0.839548	1.65218	0.836509	0.754159	0.891358	0.9948	0.1652
shDDX21	0.75099	1.2434	1.0934	0.812819	0.760769	0.93	0.09935
shC1QBP1	0.827979	1.1199	1.1249	0.651458	0.719424	0.888	0.09896
shDDX5	0.939813	1.62581	1.26421	0.827642	0.924538	1.116	0.1477
shYBX2	0.647741	1.10014	0.885468	0.65863	0.669731	0.794	0.08858
shDDX3	0.899253	0.783675	1.12962	0.81068	0.850091	0.894	0.06234
shLARP1	0.916193	0.798566	1.31243	0.840476	0.797694	0.934	0.09652
sh IGF2BP2	0.91314	0.795882	1.02885	0.775549	0.704056	0.844	0.05732
figure 1B	fold titers
ZIKV H/PF/2013	N1	N2	N3	N4	mean (%)	SEM
shNT	1	1	1	1	1	0
shRHA		1.25	0.72	0.73	0.9	0.175
shYBX1	1.22	1.38	2.17	1.27	1.51	0.2225
shDDX6		1.13	1.72	1.01	1.287	0.2194
shDDX21	1.07	0.6	0.5	0.86	0.7575	0.1289
shC1QBP1	1	0.21	0.44	0.57	0.555	0.166
shDDX5	1.04	1.7	1.33	1.63	1.425	0.1514
shYBX2		0.22	0.28	0.6	0.3667	0.1179
shDDX3		0.72	0.52	0.97	0.7367	0.1302
shLARP1	2.89	2	1.72	1.9	2.128	0.2607
sh IGF2BP2	0.33	0.13	0.13	0.11	0.175	0.05188
figure 1C	fold titers
ZIKV MR766	N1	N2	N3	N4	mean (%)	SEM
shNT	1	1	1	1	1	0
shRHA		1.16	0.34	0.43	0.6433	0.2596
shYBX1	1.24	1.89	1.45	2.07	1.663	0.1918
shDDX6		0.65	1.11	0.57	0.7767	0.1683
shDDX21	0.9	0.81	0.82	0.48	0.7525	0.09304
shC1QBP1	0.71	0.87	0.84	1.81	1.058	0.2532
shDDX5	0.81	0.81	1.18	1.88	1.17	0.2522
shYBX2		1.53	1.13	1.5	1.387	0.1286
shDDX3		1.69	2.16	2.17	2.007	0.1584
shLARP1	1.95	1.84	2.05	2.29	2.033	0.09595
sh IGF2BP2	0.32	0.47	0.29	0.24	0.33	0.0495
figure 1D	fold titers
DENV2 16681s	N1	N2	N3	N4	mean (%)	SEM
shNT	1	1	1	1	1	0
shRHA		0.57	0.59	0.39	0.5167	0.0636
shYBX1	0.88	0.61	1.02	0.93	0.86	0.08822
shDDX6		0.55	0.83	1.72	1.033	0.3527
shDDX21	0.86	0.71	0.9	1.41	0.97	0.1523
shC1QBP1	0.72	0.26	0.37	0.22	0.3925	0.1137
shDDX5	0.99	0.5	0.47	0.83	0.6975	0.1271
shYBX2		0.59	0.65	0.96	0.7333	0.1146
shDDX3		0.89	0.84	0.7	0.81	0.05686
shLARP1	0.89	0.77	0.94	1.83	1.108	0.2435
sh IGF2BP2	1.1	0.57	0.46	0.38	0.6275	0.1622
figure 1F	fold Rluc
ZIKV-R2A	N1	N2	N3	N4	N5	mean (%)	SEM
shNT	1	1	1	1	1	1	0
shRHA	0.74	0.76	0.96	0.41	0.46	0.666	0.1022
shYBX1	0.61	0.52	0.61	0.31	0.37	0.484	0.06177
shDDX6	1.07	1.01	1.52	1	1.16	1.152	0.0963
shDDX21	0.7	0.87	1.04	0.72	0.96	0.858	0.06621
shC1QBP1	0.43	0.85	0.92	1.02	0.77	0.798	0.1008
shDDX5	0.88	1.05	1.55	1.41	1.27	1.232	0.1207
shYBX2	0.19	0.58	0.65	0.47	0.32	0.442	0.08411
shDDX3	0.39	0.64	0.72	0.48	0.48	0.542	0.06003
shLARP1	0.07	0.15	1.18	0.94	0.86	0.64	0.223
sh IGF2BP2	0.26	0.49	0.65	0.39	0.41	0.44	0.06419
