# Supplementary material for: Zika virus remodels and hijacks IGF2BP2 ribonucleoprotein complex to promote viral replication organelle biogenesis
Source: eLife. 2024 Nov 20;13:RP94347. doi: 10.7554/eLife.94347 (PMC11578589; doi:10.7554/eLife.94347)
Supplement: Figure 2—source data 1. [file elife-94347-fig2-data1.xlsx]

## Sheet: Fig.2
	fold ( IGF2BP2/GAPDH RNA)
figure 2B	N1	N2	N3	N4	N5	mean (%)	SEM
shNT	1	1	1	1	1	1	0
shIGF2BP2	0.301452	0.408951	0.384219	0.303549	0.244855	0.3286	0.02994
figure 2C	Titers (pfu/ml)
Huh7.5 cells	N1	N2	N3	mean (pfu/ml)	SEM
shNT	1100000	1250000	1600000	1316667	148137
shIGF2BP2	380000	333000	310000	341000	20599
figure 2D	fold titers							figure 2D	fold cell viability
NHA-hTERT cells	N1	N2	N3	N4	mean (%)	SEM		NHA-hTERT cells	N1	N2	N3	N4	mean (%)	SEM
shNT	1	1	1	1	1	0		shNT	1	1	1	1	1	0
shIGF2BP2	0.18	0.404255	0.22	0.407273	0.3029	0.05996		shIGF2BP2	0.921688	0.920139	0.811793	0.940197	0.8985	0.02924
figure 2E	fold titers							figure 2E	fold cell viability
JEG-3 cells	N1	N2	N3	mean (%)	SEM			JEG-3 cells	N1	N2	N3	mean (%)	SEM
shNT	1	1	1	1	0			shNT	1	1	1	1	0
shIGF2BP2	0.35	0.52	0.46	0.4433	0.04978			shIGF2BP2	0.95876	1.01	1.53548	1.168	0.1843
