# Supplementary material for: Zika virus remodels and hijacks IGF2BP2 ribonucleoprotein complex to promote viral replication organelle biogenesis
Source: eLife. 2024 Nov 20;13:RP94347. doi: 10.7554/eLife.94347 (PMC11578589; doi:10.7554/eLife.94347)
Supplement: Figure 3—source data 1. [file elife-94347-fig3-data1.xlsx]

## Sheet: Fig.3
figure 3A	fold titers
ZIKV FSS13025	N1	N2	N3	mean (%)	SEM
shNT	1	1	1	1	0
shIGF2BP2	0.55	0.5	0.47	0.5067	0.02333
NITD008	0	0		0	0
figure 3B	fold titers
DENV1 HAWAII	N1	N2	N3	mean (%)	SEM
shNT	1	1	1	1	0
shIGF2BP2	1.26	0.66	1.29	1.07	0.2052
NITD008	0	0	0	0	0
figure 3C	fold titers
DENV2 NGC	N1	N2	N3	mean (%)	SEM
shNT	1	1	1	1	0
shIGF2BP2	1.02	1	1.26	1.093	0.08353
NITD008	0	0	0	0	0
figure 3D	fold titers
DENV3 H84	N1	N2	N3	mean (%)	SEM
shNT	1	1	1	1	0
shIGF2BP2	0.91	0.74	0.81	0.82	0.04933
NITD008	0	0	0	0	0
figure 3E	fold titers
DENV4 H241	N1	N2	N3	mean (%)	SEM
shNT	1	1	1	1	0
shIGF2BP2	1.33	0.99	1.09	1.137	0.1009
NITD008	0	0	0	0	0
figure 3F	fold titers
WNV NY99	N1	N2	N3	mean (%)	SEM
shNT	1	1	1	1	0
shIGF2BP2	0.74	0.96	0.89	0.8633	0.06489
NITD008	0	0	0	0	0
figure 3G	fold titers
SARS-CoV-2	N1	N2	N3	mean (%)	SEM
shNT	1	1	1	1	0
shIGF2BP2	0.98	1.2	0.83	1.003	0.1074
Remdesivir	0	0	0	0	0
