# Supplementary material for: Zika virus remodels and hijacks IGF2BP2 ribonucleoprotein complex to promote viral replication organelle biogenesis
Source: eLife. 2024 Nov 20;13:RP94347. doi: 10.7554/eLife.94347 (PMC11578589; doi:10.7554/eLife.94347)
Supplement: Figure 4—source data 1. [file elife-94347-fig4-data1.xlsx]

## Sheet: Fig.4
	Manders'
Figure 4B	NS3/IGF2BP2	dsRNA/IGF2BP2
Cells	0.571	0.552
	0.327	0.324
	0.399	0.337
	0.477	0.497
	0.521	0.492
	0.623	0.611
	0.673	0.551
	0.411	0.417
	0.463	0.363
	0.614	0.607
	0.708	0.655
	0.189	0.437
	0.785	0.451
	0.129	0.374
	0.519	0.616
	0.353	0.611
	0.413	0
	0.896	0.583
	0.408	0.919
	0.424	0.567
	0.434	0.579
	0.251	0.643
	0.903	0.332
	0.429	0
	0.514	0.706
	0.565	0.433
	0.222	0.562
	0.226	0.431
	0.037	0.139
	0.162	0.165
		0.209
		0.5
Number of values	30	32
Mean	0.4549	0.4582
Std. Error of Mean	0.03911	0.03554
figure 4D	fold										figure 4D	fold
cell extract	N1	N2	N3	N4	N5	N6	N7	mean (%)	SEM		IP anti-HA	N1	N2	N3	N4	N5	N6	N7	N8	N9	mean (%)	SEM
- IGF2BP2-HA	0.93	0.65	0.5	1.17	1.28	0.84	1.07	0.92	0.1058		- IGF2BP2-HA	0.01	0.02	0.01	0.21	0.41	0.11	0.34778	0.3	0.05	0.1631	0.05257
+IGF2BP2-HA	1	1	1	1	1	1	1	1	0		+IGF2BP2-HA	1	1	1	1	1	1	1	1	1	1	0
