# Supplementary material for: Zika virus remodels and hijacks IGF2BP2 ribonucleoprotein complex to promote viral replication organelle biogenesis
Source: eLife. 2024 Nov 20;13:RP94347. doi: 10.7554/eLife.94347 (PMC11578589; doi:10.7554/eLife.94347)
Supplement: Figure 5—source data 1. [file elife-94347-fig5-data1.xlsx]

## Sheet: Fig.5
Figure 5A	Manders'
Cells	0.362
	0.311
	0.562
	0.315
	0.442
	0.387
	0.346
	0.356
	0.434
	0.346
	0.312
	0.482
	0.34
	0.214
	0.4
	0.214
	0.369
	0.24
	0.215
	0.122
	0.258
	0.098
	0.269
	0.254
	0.112
	0.111
	0.426
	0.18
	0.223
	0.055
	0.022
Number of values	31
Mean	0.2831
Std. Error of Mean	0.02351
figure 5B		fold						figure 5B		fold
cell extract		N1	N2	N3	mean (%)	SEM		IP anti-HA		N1	N2	N3	mean (%)	SEM
mock	-IGF2BP2-HA	0	0	0	0	0		mock	-IGF2BP2-HA	0	0	0	0	0
	+IGF2BP2-HA	0	0	0	0	0			+IGF2BP2-HA	0	0	0	0	0
ZIKV	-IGF2BP2-HA	1.27	0.86	1.34	1.157	0.1497		ZIKV	-IGF2BP2-HA	0.11	0.26	0.14	0.17	0.04583
	+IGF2BP2-HA	1	1	1	1	0			+IGF2BP2-HA	1	1	1	1	0
Figure 5D		ZIKV 3'UTR						Figure 5D		ZIKV 3'UTR
RRM	concentration (M)	Mean	SD					KH34	concentration (M)	Mean	SD
RRM	6.10352e-10	0.00877993	0.0541058					KH34	1.98364e-09	0.00190461	0.0821316
	1.2207e-09	0.0241269	0.0393681						3.96729e-09	0.0416802	0.0630683
	2.44141e-09	0.0484117	0.123744						7.93457e-09	-0.0120289	0.0365091
	4.88281e-09	0.0287277	0.0337141						1.58691e-08	0.0299568	0.157584
	9.76563e-09	0.114243	0.0758104						3.17383e-08	-0.0152093	0.107162
	1.95313e-08	0.117244	0.0005083						6.34766e-08	0.0859858	0.130811
	3.90625e-08	-0.0224346	0.0616407						1.26953e-07	0.130311	0.0314971
	7.8125e-08	0.00703166	0.0728304						2.53906e-07	0.282171	0.0235176
	1.5625e-07	0.17293	0.0387408						5.07813e-07	0.479373	0.2293
	3.125e-07	0.267108	0.0501498						1.01563e-06	0.633376	0.0720488
	6.25e-07	0.239638	0.0879567						2.03125e-06	0.893646	0.0890582
	1.25e-06	0.307768	0.0261766						4.0625e-06	0.967091	0.0399051
	2.5e-06	0.625725	0.0720399						8.125e-06	0.93884	0.175966
	5e-06	0.820233	0.0489067						1.625e-05	0.921388	0.142873
									3.25e-05	1.0855	0.135077
									6.5e-05	0.947417	0.0350321
Figure 5D		ZIKV 5'UTR						Figure 5D		ZIKV 5'UTR
RRM	concentration (M)	Mean	SD					KH34	concentration (M)	Mean	SD
RRM	6.10352e-10	-0.0121393	0.0532834					KH34	1.98364e-09	0.00128687	0.0321398
	1.2207e-09	-0.0309699	0.0564251						3.96729e-09	-0.0694247	0.0433681
	2.44141e-09	0.0265067	0.0586776						7.93457e-09	0.0427585	0.125995
	4.88281e-09	0.0149535	0.0347312						1.58691e-08	-0.00390231	0.0879064
	9.76563e-09	0.0419917	0.019237						3.17383e-08	0.0843202	0.0959003
	1.95313e-08	0.00161745	0.0146627						6.34766e-08	0.134729	0.0701369
	3.90625e-08	0.0467313	0.0210962						1.26953e-07	0.220404	0.110583
	7.8125e-08	0.0557145	0.0506178						2.53906e-07	0.529409	0.0950442
	1.5625e-07	0.0491226	0.0256245						5.07813e-07	0.694106	0.0904892
	3.125e-07	0.0518349	0.0665152						1.01563e-06	0.678508	0.0220855
	6.25e-07	0.0612257	0.119759						2.03125e-06	0.732242	0.116267
	1.25e-06	0.0194583	0.0224696						4.0625e-06	0.97406	0.0642783
	2.5e-06	0.0123952	0.0498974						8.125e-06	1.17167	0.063086
	5e-06	0.0464592	0.0136421						1.625e-05	0.956536	0.0125938
	1e-05	0.0357196	0.0078969
									6.5e-05	1.01077	0.197164
