# Supplementary material for: Zika virus remodels and hijacks IGF2BP2 ribonucleoprotein complex to promote viral replication organelle biogenesis
Source: eLife. 2024 Nov 20;13:RP94347. doi: 10.7554/eLife.94347 (PMC11578589; doi:10.7554/eLife.94347)
Supplement: Figure 6—source data 1. [file elife-94347-fig6-data1.xlsx]

## Sheet: Fig.6
Figure 6B		Fold Rluc
48H post-electroporation		N1	N2	N3	N4	Mean (%)	SEM
ZIVK sgR2A	shNT	1	1	1	1	1	0
	shIGF2BP2	0.579401	0.749388	0.713434	0.669522	0.6779	0.03668
ZIVK sgR2A GAA	shNT	0.0100051	0.0107526	0.0381548	0.00322508	0.01553	0.007728
	shIGF2BP2	0.0691162	0.00884428	0.0497768	0.0027726	0.03263	0.01603
Figure 6C		Fold Rluc
4h post-electroporation		N1	N2	N3	N4	Mean (%)	SEM
ZIVK sgR2A	shNT	1	1	1	1	1	0
	shIGF2BP2	0.723889	1.04677	0.927398	1.96943	1.167	0.2757
ZIVK sgR2A GAA	shNT	1	1	1	1	1	0
	shIGF2BP2	0.896078	0.992303	1.41909	1.45704	1.191	0.1441
