# Supplementary material for: Zika virus remodels and hijacks IGF2BP2 ribonucleoprotein complex to promote viral replication organelle biogenesis
Source: eLife. 2024 Nov 20;13:RP94347. doi: 10.7554/eLife.94347 (PMC11578589; doi:10.7554/eLife.94347)
Supplement: Figure 7—source data 1. [file elife-94347-fig7-data1.xlsx]

## Sheet: Fig.7
figure 7A		fold						figure 7A		fold
cell extract		N1	N2	N3	mean (%)	SEM		IP anti-HA		N1	N2	N3	mean (%)	SEM
mock	-IGF2BP2-HA	1.8	0.91	0.81	1.173	0.3147		mock	-IGF2BP2-HA	0.05	0.13	0.04	0.07333	0.02848
	+IGF2BP2-HA	1	1	1	1	0			+IGF2BP2-HA	1	1	1	1	0
ZIKV	-IGF2BP2-HA	1.92	0.1	0.43	0.8167	0.5598		ZIKV	-IGF2BP2-HA	0.01	0.01	0.01	0.01	0
	+IGF2BP2-HA	2.64	0.22	0.41	1.09	0.7769			+IGF2BP2-HA	0.12	0.11	0.06	0.09667	0.01856
figure 7B		fold						figure 7B		fold
cell extract		N1	N2	N3	mean (%)	SEM		IP anti-HA		N1	N2	N3	mean (%)	SEM
mock	-IGF2BP2-HA	1.13	0.91	0.65	0.8967	0.1387		mock	-IGF2BP2-HA	0.01	0.09	0.04	0.04667	0.02333
	+IGF2BP2-HA	1	1	1	1	0			+IGF2BP2-HA	1	1	1	1	0
ZIKV	-IGF2BP2-HA	1.46	0.3	0.82	0.86	0.3355		ZIKV	-IGF2BP2-HA	0.01	0.03	0.0356489	0.02522	0.007781
	+IGF2BP2-HA	2.57	0.41	0.73	1.237	0.673			+IGF2BP2-HA	0.49	0.35	0.316439	0.3855	0.05315
figure 7C		fold						figure 7C		fold
cell extract		N1	N2	N3	mean (%)	SEM		IP anti-HA		N1	N2	N3	mean (%)	SEM
mock	-IGF2BP2-HA	1.39	0.67	0.86	0.9733	0.2154		mock	-IGF2BP2-HA	0.03	0.39	0.18	0.2	0.1044
	+IGF2BP2-HA	1	1	1	1	0			+IGF2BP2-HA	1	1	1	1	0
ZIKV	-IGF2BP2-HA	2.07	1.24	1.68	1.663	0.2397		ZIKV	-IGF2BP2-HA	0.05	0.25	0.23	0.1767	0.0636
	+IGF2BP2-HA	2.95	1.21	2.1	2.087	0.5023			+IGF2BP2-HA	1.84	1.2	0.75	1.263	0.3162
