# Supplementary material for: Zika virus remodels and hijacks IGF2BP2 ribonucleoprotein complex to promote viral replication organelle biogenesis
Source: eLife. 2024 Nov 20;13:RP94347. doi: 10.7554/eLife.94347 (PMC11578589; doi:10.7554/eLife.94347)
Supplement: Figure 8—figure supplement 1—source data 1. [file elife-94347-fig8-figsupp1-data1.xlsx]

## Sheet: Figure 8-figure supplement 1
	Manders'				Manders'				Manders'
Figure 8S1A	NS3/IGF2BP3	dsRNA/IGF2BP3		Figure 8S1B	NS3/IGF2BP1	dsRNA/IGF2BP1		Figure 8S1C	NS3/YBX1	dsRNA/YBX1
Cells	0.376	0.521		Cells	0.18	0.385		Cells	0.212	0.576
	0.497	0.49			0.067	0.179			0.633	0.582
	0.483	0.686			0.025	0.19			0.357	0.427
	0.266	0.438			0.382	0.501			0.115	0.467
	0.343	0.52			0.094	0.451			0.144	0.804
	0.345	0.247			0.153	0.384			0.34	0.49
	0.284	0.568			0.072	0.073			0.146	0.447
	0.506	0.782			0.088	0.715			0.52	0.767
	0.702	0.86			0.562	0.767			0.686	0.55
	0.12	0.231			0.61	0.789			0.401	0.755
	0.168	0.341			0.651	0.641			0.534	0.622
	0.437	0.479			0.659	0.667			0.49	0.747
	0.724	0.755			0.328	0.607			0.325	0.473
	0.243	0.427			0.538	0.5			0.504	0.592
	0.531	0.688			0.288	0.492			0.415	0.512
	0.712	0.667			0.075	0.758			0.356	0.372
	0.651	0.861			0.026	0.562			0.605	0.822
	0.817	0.57			0.062	0.224			0.559	0.912
	0.225	0.12			0.146	0.296			0.329	0.687
	0.205	0.271		Number of values	19	19			0.405	0.76
Number of values	20	20		Mean	0.2635	0.4832			0.625	0.711
Mean	0.4318	0.5261		Std. Error of Mean	0.05318	0.04996			0.273	0.414
Std. Error of Mean	0.04646	0.04777							0.574	0.856
									0.24	0.179
									0.605	0.416
									0.422	0.615
									0.426	0.346
									0.639	0.434
									0.401	0.519
									0.417	0.66
									0.291	0.389
									0.229	0.237
									0.107	0.147
									0.371	0.128
									0.391	0.217
									0.262	0.288
									0.346	0.409
									0.314	0.168
									0.232	0.367
								Number of values	39	39
								Mean	0.3908	0.5093
								Std. Error of Mean	0.02498	0.03376
