# Supplementary material for: Zika virus remodels and hijacks IGF2BP2 ribonucleoprotein complex to promote viral replication organelle biogenesis
Source: eLife. 2024 Nov 20;13:RP94347. doi: 10.7554/eLife.94347 (PMC11578589; doi:10.7554/eLife.94347)
Supplement: Figure 8—figure supplement 2—source data 1. [file elife-94347-fig8-figsupp2-data1.xlsx]

## Sheet: Figure 8-figure supplement 2
Figure 8S2A	NS3/LARP1	dsRNA/LARP1		Figure 8S2B	NS3/DDX5	dsRNA/DDX5		Figure 8S2C	IGF2BP2	IGF2BP1	IGF2BP3	YBX1	LARP1	DDX5		Figure 8S2D	IGF2BP2	IGF2BP1	IGF2BP3	YBX1	LARP1	DDX5
Cells	0.048	0.345		Cells	0	0.023		Cells	0.571	0.18	0.376	0.212	0.048	0		Cells	0.552	0.385	0.521	0.576	0.345	0.023
	0.039	0.237			0	0			0.327	0.067	0.497	0.633	0.039	0			0.324	0.179	0.49	0.582	0.237	0
	0.063	0.231			0.006	0			0.399	0.025	0.483	0.357	0.063	0.006			0.337	0.19	0.686	0.427	0.231	0
	0.05	0.404			0.001	0.001			0.477	0.382	0.266	0.115	0.05	0.001			0.497	0.501	0.438	0.467	0.404	0.001
	0.11	0.234			0	0			0.521	0.094	0.343	0.144	0.11	0			0.492	0.451	0.52	0.804	0.234	0
	0.058	0.26			0.001	0			0.623	0.153	0.345	0.34	0.058	0.001			0.611	0.384	0.247	0.49	0.26	0
	0.049	0.337			0	0			0.673	0.072	0.284	0.146	0.049	0			0.551	0.073	0.568	0.447	0.337	0
	0.075	0.337			0	0.006			0.411	0.088	0.506	0.52	0.075	0			0.417	0.715	0.782	0.767	0.337	0.006
	0.04	0.244			0	0.001			0.463	0.562	0.702	0.686	0.04	0			0.363	0.767	0.86	0.55	0.244	0.001
	0.031	0.188			0	0			0.614	0.61	0.12	0.401	0.031	0			0.607	0.789	0.231	0.755	0.188	0
	0.086	0.438			0	0			0.708	0.651	0.168	0.534	0.086	0			0.655	0.641	0.341	0.622	0.438	0
	0.045	0.266			0	0			0.189	0.659	0.437	0.49	0.045	0			0.437	0.667	0.479	0.747	0.266	0
	0.006	0.363			0	0.011			0.785	0.328	0.724	0.325	0.006	0			0.451	0.607	0.755	0.473	0.363	0.011
	0.024	0.281			0.002	0.007			0.129	0.538	0.243	0.504	0.024	0.002			0.374	0.5	0.427	0.592	0.281	0.007
	0.01	0.46			0	0.004			0.519	0.288	0.531	0.415	0.01	0			0.616	0.492	0.688	0.512	0.46	0.004
	0.011	0.423			0	0.001			0.353	0.075	0.712	0.356	0.011	0			0.611	0.758	0.667	0.372	0.423	0.001
	0.076	0.164			0	0			0.413	0.026	0.651	0.605	0.076	0			0	0.562	0.861	0.822	0.164	0
	0.025	0.081			0	0.003			0.896	0.062	0.817	0.559	0.025	0			0.583	0.224	0.57	0.912	0.081	0.003
	0.127	0.287			0	0			0.408	0.146	0.225	0.329	0.127	0			0.919	0.296	0.12	0.687	0.287	0
	0.02	0.235			0.003	0.107			0.424		0.205	0.405	0.02	0.003			0.567		0.271	0.76	0.235	0.107
	0.061	0.255			0	0.022			0.434			0.625	0.061	0			0.579			0.711	0.255	0.022
	0.115	0.222			0.025	0.038			0.251			0.273	0.115	0.025			0.643			0.414	0.222	0.038
	0.073	0.221			0	0			0.903			0.574	0.073	0			0.332			0.856	0.221	0
	0.088	0.315			0.005	0.016			0.429			0.24	0.088	0.005			0			0.179	0.315	0.016
	0.037	0.16			0.002	0.042			0.514			0.605	0.037	0.002			0.706			0.416	0.16	0.042
	0.115	0.222			0	0.005			0.565			0.422	0.115	0			0.433			0.615	0.222	0.005
	0.053	0.277		Number of values	26	26			0.222			0.426	0.053				0.562			0.346	0.277
	0.174	0.233		Mean	0.001731	0.01104			0.226			0.639	0.174				0.431			0.434	0.233
	0.055	0.206		Std. Error of Mean	0.0009822	0.004475			0.037			0.401	0.055				0.139			0.519	0.206
	0.049	0.154							0.162			0.417	0.049				0.165			0.66	0.154
	0.094	0.201										0.291	0.094				0.209			0.389	0.201
Number of values	31	31										0.229					0.5			0.237
Mean	0.06152	0.2671										0.107								0.147
Std. Error of Mean	0.006892	0.01586										0.371								0.128
												0.391								0.217
												0.262								0.288
												0.346								0.409
												0.314								0.168
												0.232								0.367
								Number of values	30	19	20	39	31	26		Number of values	32	19	20	39	31	26
								Mean	0.4549	0.2635	0.4318	0.3908	0.06152	0.001731		Mean	0.4582	0.4832	0.5261	0.5093	0.2671	0.01104
								Std. Error of Mean	0.03911	0.05318	0.04646	0.02498	0.006892	0.0009822		Std. Error of Mean	0.03554	0.04996	0.04777	0.03376	0.01586	0.004475
