# Supplementary material for: Zika virus remodels and hijacks IGF2BP2 ribonucleoprotein complex to promote viral replication organelle biogenesis
Source: eLife. 2024 Nov 20;13:RP94347. doi: 10.7554/eLife.94347 (PMC11578589; doi:10.7554/eLife.94347)
Supplement: Figure 8—figure supplement 3—source data 1. [file elife-94347-fig8-figsupp3-data1.xlsx]

## Sheet: Figure 8-figure supplement 3
		fold
figure 8S3C		N1	N2	mean (%)	SEM
ZIKV	-RNAse	0.266438	0.298142	0.2823	0.01585
	-RNAse	1	1	1	0
	+RNAse	0.219894	0.290243	0.2551	0.03517
