# Supplementary material for: Zika virus remodels and hijacks IGF2BP2 ribonucleoprotein complex to promote viral replication organelle biogenesis
Source: eLife. 2024 Nov 20;13:RP94347. doi: 10.7554/eLife.94347 (PMC11578589; doi:10.7554/eLife.94347)
Supplement: Figure 8—source data 1. [file elife-94347-fig8-data1.xlsx]

## Sheet: Fig.8
figure 8B	fold									figure 8B	fold
cell extract	N1	N2	N3	N4	N5	mean (%)	SEM			IP anti-HA	N1	N2	N3	N4	N5	mean (%)	SEM
+ IGF2BP2-HA; -ZIKV	1	1	1	1	1	1	0			+ IGF2BP2-HA; -VZIK	1	1	1	1	1	1	0
+ IGF2BP2-HA; +ZIKV	1.79	1.39	0.35	0.86	0.62	1.002	0.261			+IGF2BP2-HA; +VZIK	0.66	0.91	0.84	0.47	0.6	0.696	0.08004
figure 8C	fold									figure 8C	fold
cell extract	N1	N2	N3	N4	N5	N6	mean (%)	SEM		IP anti-HA	N1	N2	N3	N4	N5	N6	N7	mean (%)	SEM
+ IGF2BP2-HA; -ZIKV	1	1	1	1	1	1	1	0		+ IGF2BP2-HA; -VZIK	1	1	1	1	1	1	1	1	0
+ IGF2BP2-HA; +ZIKV	3.65	2.13	0.87	1.09	1.04627	1.46	1.708	0.4295		+IGF2BP2-HA; +VZIK	0.41	0.22	0.47	1.36	0.7	0.36493	1.40509	0.7043	0.1834
figure 8D	fold									figure 8D	fold
cell extract	N1	N2	N3	N4	N5	mean (%)	SEM			IP anti-HA	N1	N2	N3	N4	N5	mean (%)	SEM
+ IGF2BP2-HA; -VZIK	1	1	1	1	1	1	0			+ IGF2BP2-HA; -VZIK	1	1	1	1	1	1	0
+IGF2BP2-HA; +VZIK	1.43	1.41	0.46	0.9	1.02	1.044	0.1796			+IGF2BP2-HA; +VZIK	0.57	0.64	1.35	0.36	1.78	0.94	0.268
