# Supplementary material for: Zika virus remodels and hijacks IGF2BP2 ribonucleoprotein complex to promote viral replication organelle biogenesis
Source: eLife. 2024 Nov 20;13:RP94347. doi: 10.7554/eLife.94347 (PMC11578589; doi:10.7554/eLife.94347)
Supplement: Figure 9—figure supplement 2—source data 1. [file elife-94347-fig9-figsupp2-data1.xlsx]

## Sheet: Figure 9-figure supplement 2
figure 9S2B left panel		fold						figure 9S2B right panel		fold
cell extract		N1	N2	N3	mean (%)	SEM		IP anti-HA		N1	N2	N3	mean (%)	SEM
+IGF2BP2-HA	-ZIKV	1	1	1	1	0		+IGF2BP2-HA	-ZIKV	1	1	1	1	0
	+ZIKV	2.99	0.65	0.89	1.51	0.7432			+ZIKV	158.28	11.37	17.36	62.34	48
