# Supplementary material for: Zika virus remodels and hijacks IGF2BP2 ribonucleoprotein complex to promote viral replication organelle biogenesis
Source: eLife. 2024 Nov 20;13:RP94347. doi: 10.7554/eLife.94347 (PMC11578589; doi:10.7554/eLife.94347)
Supplement: Figure 10—source data 1. [file elife-94347-fig10-data1.xlsx]

## Sheet: Fig.10
	fold
figure 10B	N1	N2	N3	mean (%)	SEM
shNT	0.8875	1	1.1345	1.007	0.0714
shIGF2BP2	0.132394	0.167516	0.124137	0.1413	0.0133
	fold
figure 10D	N1	N2	N3	mean (%)	SEM
shNT	69.7	62.3	50.06	60.69	5.727
shIGF2BP2	67.4	61.1665	47.12	58.56	5.997
	fold
figure 10F	N1	N2	N3	N4	mean (%)	SEM
shNT	67	73	81.18	70	72.8	3.052
shIGF2BP2	40	44.8	33.3	40	39.53	2.363
figure 10G	shNT	shIGF2BP2
VP size	61.8452	71.8142
		68.7723
	62.7013	46.5239
		48.7723
	101.086	71.5206
		77.3594
	73.6974	81.5168
		72.8348
	41.4374	70.7168
		63.3645
	45.8839	70.6787
		72.1045
	59.6394	80.0865
		80.6787
	65.6213	66.2581
		72.8039
	66.8394	55.231
		58.3665
	84.1877	53.1903
		51.6123
	60.3219	48.8768
		56.5935
	67.0865	77.9477
		74.9819
	74.3335	60.1335
		58.9374
	69.0432	75.6452
		66.0723
	61.2284	78.831
		63.7484
	61.8794	65.1665
		46.4729
	65.6555	66.7161
		68.351
	70.1297	71.9329
		53.2348
	73.9406	68.4265
		58.7865
	76.2935	45.1555
		87.5032
	70.0981	75.6561
		71.4903
	68.571	78.4684
		69.9748
	67.0103	50.4258
		66.2323
	70.9181	70.8155
		68.6419
	66.3516	60.9865
		62.7542
	80.7187	37.3142
		49.8626
	87.0877	68.7652
		90.2013
	76.9135	62.6374
		56.1316
	54.9413	61.3594
		76.8155
	72.4258	63.7935
		67.4587
	74.5103	62.4516
		70.4432
	73.0432	70.2452
		69.7045
	69.3303	67.8174
		56.5703
	72.0581	56.1832
		73.0258
	68.5735	69.6084
		44.4781
	62.6516	59.0787
		44.3258
	69.5245	81.0548
		67.0103
	56.3594	90.1671
		94.9665
	68.1639	96.3806
		83.0026
	62.5568	113.808
		84.5006
	71.4445	75.0561
		72.9884
	96.7052	70.0432
		85.4316
	57.0781	58.8071
		57.9148
	64.2181	65.2084
		63.251
	65.9748	75.4619
		69.6381
	85.7084	48.131
		95.4723
	67.5174	66.4058
		74.5858
	73.5387	91.1387
		73.0794
	82.8206	78.5535
		69.9677
	60.9703	60.5916
		65.7516
	51.6368	52.2645
		74.1697
	69.1974	75.6161
		67.2387
	69.6161	84.9045
		64.7187
	67.4465	60.0168
		47.751
	79.1258	63.3548
		58.9865
	65.8613	64.9742
		68.4923
	66.8303	72.1594
		65.8387
	69.3774	62.089
		59.5077
	66.2684	61.2465
		61.9748
	76.4742	60.8245
		68.4961
	68.691	52.4026
		62.0613
	71.391	53.4568
		71.8458
	88.7219	78.6129
		83.969
	66.1277	86.1419
		78.0252
	60.0245	84.9903
		67.4174
	57.6129	72.3084
		68.6181
	81.3361	72.771
		65.9548
	73.7903	70.1716
		64.0135
	64.2361	57.6916
		73.451
	86.0677	64.0077
		62.6071
	55.7826	62.6071
		64.0077
	76.6677	57.5452
		58.511
	64.531	65.6806
		68.0439
	72.5503	68.4155
		101.899
	62.5316	69.7045
		59.8729
	58.5587	70
		68.6284
	69.1794	64.7452
		65.9058
	81.2071	67.2948
		58.9813
	73.3348	68.0161
		52.3903
	59.4819	49.5135
		57.5097
	51.6265	57.9619
		56.311
	53.094	60.2174
	78.8845	63.2497
	69.0155	65.7226
	59.3923	65.371
	75.3723	56.5587
	61.4432	48.8613
	53.4961	53.0935
	62.4529	65.371
	72.3168	56.8626
	69.88
	79.2542
	92.6232
	57.2632
	90.1581
	66.4097
	66.6555
	65.1955
	55.3413
	68.0735
	76.7516
	72.4794
	65.631
	75.9071
	128.559
	74.1361
	65.4123
	48.8703
	55.7419
	54.6748
	59.4735
	70.8948
	93.6245
	66.3406
	78.3458
	51.089
	60.6639
	55.5658
	68.8774
	75.34
	68.2303
	62.9006
	65.3232
	79.4232
	68.0329
	73.7168
	49.2819
	61.7387
	64.2368
	70.2729
	63.8142
	56.9213
	54.6581
	58.4316
	72.3252
	56.1923
	64.9097
	68.9877
	55.2503
	72.2458
	60.709
	70.7768
	56.9671
	69.1252
	63.4381
	65.151
	117.655
	68.7561
	76.2619
	61.9
	73.7981
	68.4277
	73.329
	61.8465
	64.1458
	70.1006
	58.9832
	65.771
	73.4987
	76.44
	74.3458
	75.32
	62.6703
	76.5503
	80.0135
	91.5606
	65.4929
	68.8226
	72.4594
	88.3535
	77.3071
	71.8471
	52.5761
	64.7948
	51.7742
	65.9555
	52.4161
	65.4529
	60.9355
	68.6794
	65.9213
	77.0671
	71.7265
	64.9361
	81.7039
	72.9135
	83.291
	84.0032
	75.1587
	89.1368
	61.7806
	85.3613
	81.1639
	81.4187
	80.929
	85.6477
	71.3948
	79.9613
	75.5948
	71.3471
	79.0348
	93.2794
	81.6581
	76.8832
	87.9626
	101.181
	80.1174
	63.331
	63.9032
	62.1968
	74.7187
	82.6806
	78.7303
	78.0503
	60.8729
	73.5735
	72.6884
	72.291
	61.4981
	60.0955
	76.2652
	59.2006
	44.3058
	51.5897
	59.2484
	72.6665
	69.5981
	69.9865
	58.3155
	55.0116
	53.7335
	59.8903
	56.1968
	73.1252
	67.9084
	71.2555
	69.5781
	74.8497
	68.9665
	70.3458
	57.0852
	82.769
	55.4039
	61.1916
	58.7523
	68.5619
	70.7832
	79.4432
	74.4019
	66.1916
	52.8239
	62.1303
	54.711
	42.9897
	56.4123
	62.5484
	60.4419
	69.8852
	95.6484
	67.1355
	66.1065
	68.4484
	71.8316
	69.5529
	80.2116
	69.7019
	57.991
	74.7897
	71.6097
	66.8503
	64.3819
	62.5452
	76.5774
	53.9155
	66.1626
	87.8787
	59.3626
	95.4671
	91.6845
	85.7394
	66.9271
	91.671
	91.3684
	69.3774
	60.5697
	51.269
	64.7729
	69.0232
	72.4432
	66.8161
	73.4374
	59.4523
	50.4103
	64.7271
	54.8942
	68.2897
	70.0129
	64.1942
	60.1219
	58.7387
	73.0948
	68.3961
	65.0903
	72.7923
	73.9471
	64.2129
	58.9916
	77.1826
	75.5361
	78.4961
	73.7181
	75.8981
	71.3394
	70.4748
	82.9406
	48.9735
	89.4361
	73.3755
	70.1445
	74.3935
	74.7548
	78.1206
	81.8877
	84.9658
	83.0645
	63.3671
	56.3923
	47.091
	70.4987
	58.9065
	59.8206
	59.1419
	69.2381
	57.5187
	63.1277
	53.7581
	77.5316
	53.5981
	54.4677
	60.1729
	52.6774
	57.0574
	65.6361
	55.3342
	46.0497
	59.8432
	67.6826
	65.6168
	60.0458
	64.4903
	71.4665
	60.769
	65.5613
	70.2116
Number of values	354	171
Mean	68.8	66.92
Std. Error of Mean	0.5956	0.8916
